# Supplementary material for: Rapid, iterative syntheses of unsymmetrical di- and triarylboranes from crystalline aryldifluoroboranes
Source: Royal Society of Chemistry journal article supplement (doi:10.1039/d3sc05071h), 2023-01-01
Supplement: d3sc05071h1.pdf [file d3sc05071h1.pdf]

## **ELECTRONIC SUPPLEMENTARY INFORMATION**

Rapid, Iterative Syntheses of Unsymmetrical Di- and Triarylboranes from  
Crystalline Aryldifluoroboranes

Douglas Turnbull and Marc-André Légaré

**Table of contents.**

|                                              |            |
|----------------------------------------------|------------|
| <b>Experimental methods.....</b>             | <b>7</b>   |
| <b>Experimental and calculated data.....</b> | <b>32</b>  |
| <b>NMR spectra. ....</b>                     | <b>37</b>  |
| <b>Optimised geometries.....</b>             | <b>115</b> |
| <b>References.....</b>                       | <b>138</b> |

**List of tables.**

|                                                                                                                                                                                                                    |    |
|--------------------------------------------------------------------------------------------------------------------------------------------------------------------------------------------------------------------|----|
| <b>Table S1.</b> Optimisation of In Situ Synthesis of ArAr'BX from ArBX <sub>2</sub> and Ar'M.....                                                                                                                 | 24 |
| <b>Table S2.</b> Calculated $\Delta G$ and $\Delta H$ (kcal mol <sup>-1</sup> ) for Reactions of <b>3</b> with [BF <sub>4</sub> ] <sup>-</sup> and FIAs (kcal mol <sup>-1</sup> ) of <b>3</b> <sup>[a]</sup> ..... | 32 |
| <b>Table S3.</b> Experimental and Calculated <sup>11</sup> B and <sup>19</sup> F Chemical Shifts of <b>3–6</b> <sup>[a]</sup> .....                                                                                | 32 |
| <b>Table S4.</b> Selected Experimental and Calculated <sup>[a]</sup> Bond Lengths (in Å) and Angles (in °) of <b>3</b> and Related Compounds .....                                                                 | 33 |
| <b>Table S5.</b> Selected Experimental and Calculated <sup>[a]</sup> Bond Lengths (in Å) and Angles (in °) of <b>4–6</b> .....                                                                                     | 36 |

## List of figures.

|                                                                                                                                                                                                                                                                  |    |
|------------------------------------------------------------------------------------------------------------------------------------------------------------------------------------------------------------------------------------------------------------------|----|
| <b>Figure S1.</b> Standard numbering schemes for (hetero)aryl groups.....                                                                                                                                                                                        | 11 |
| <b>Figure S2.</b> Thermal ellipsoid plots (298 K, 30% probability level) of $\text{BBr}_3 \cdot \text{NMe}_2(4\text{-C}_6\text{H}_4\text{R})$ . Colours denote brown (Br), violet (Si), blue (N), pink (B), and grey (C), with H atoms omitted for clarity. .... | 34 |
| <b>Figure S3.</b> Optimised geometries and thermochemical data for calculated (PW6B95-D3(BJ)/def2-TZVP) $\text{MesBX}_2$ dimers. Colours denote brown (Br), yellow-green (Cl), green (F), pink (B), and grey (C), with H atoms omitted for clarity. ....         | 35 |
| <b>Figure S4.</b> $^1\text{H}$ NMR spectrum of <b>2b</b> .....                                                                                                                                                                                                   | 37 |
| <b>Figure S5.</b> $^{13}\text{C}$ NMR spectrum of <b>2b</b> .....                                                                                                                                                                                                | 38 |
| <b>Figure S6.</b> $^{11}\text{B}$ NMR spectrum of <b>2b</b> .....                                                                                                                                                                                                | 39 |
| <b>Figure S7.</b> $^1\text{H}$ - $^{13}\text{C}$ HMBC NMR spectrum of <b>2b</b> . Labelled peak correlates to the $\text{C}_i$ atom. ....                                                                                                                        | 40 |
| <b>Figure S8.</b> $^1\text{H}$ NMR spectrum of <b>3a</b> .....                                                                                                                                                                                                   | 41 |
| <b>Figure S9.</b> $^{13}\text{C}$ NMR spectrum of <b>3a</b> .....                                                                                                                                                                                                | 42 |
| <b>Figure S10.</b> $^{11}\text{B}$ NMR spectrum of <b>3a</b> .....                                                                                                                                                                                               | 43 |
| <b>Figure S11.</b> $^{19}\text{F}$ NMR spectrum of <b>3a</b> .....                                                                                                                                                                                               | 44 |
| <b>Figure S12.</b> $^1\text{H}$ - $^{13}\text{C}$ HMBC NMR spectrum of <b>3a</b> . Labelled peak correlates to the $\text{C}_i$ atom. ....                                                                                                                       | 45 |
| <b>Figure S13.</b> $^1\text{H}$ NMR spectrum of <b>3b</b> .....                                                                                                                                                                                                  | 46 |
| <b>Figure S14.</b> $^{13}\text{C}$ NMR spectrum of <b>3b</b> .....                                                                                                                                                                                               | 47 |
| <b>Figure S15.</b> $^{11}\text{B}$ NMR spectrum of <b>3b</b> .....                                                                                                                                                                                               | 48 |
| <b>Figure S16.</b> $^{19}\text{F}$ NMR spectrum of <b>3b</b> .....                                                                                                                                                                                               | 49 |
| <b>Figure S17.</b> $^1\text{H}$ - $^{13}\text{C}$ HMBC NMR spectrum of <b>3b</b> . Labelled peak correlates to the $\text{C}_i$ atom. ....                                                                                                                       | 50 |
| <b>Figure S18.</b> $^1\text{H}$ NMR spectrum of <b>3c</b> .....                                                                                                                                                                                                  | 51 |
| <b>Figure S19.</b> $^{13}\text{C}$ NMR spectrum of <b>3c</b> .....                                                                                                                                                                                               | 52 |

|                                                                                                                    |    |
|--------------------------------------------------------------------------------------------------------------------|----|
| <b>Figure S20.</b> $^{11}\text{B}$ NMR spectrum of <b>3c</b> .                                                     | 53 |
| <b>Figure S21.</b> $^{19}\text{F}$ NMR spectrum of <b>3c</b> .                                                     | 54 |
| <b>Figure S22.</b> $^1\text{H}$ - $^{13}\text{C}$ HMBC NMR spectrum of <b>3c</b> . Labelled peak correlates to C1. | 55 |
| <b>Figure S23.</b> $^1\text{H}$ NMR spectrum of <b>3d</b> .                                                        | 56 |
| <b>Figure S24.</b> $^{13}\text{C}$ NMR spectrum of <b>3d</b> .                                                     | 57 |
| <b>Figure S25.</b> $^{11}\text{B}$ NMR spectrum of <b>3d</b> .                                                     | 58 |
| <b>Figure S26.</b> $^{19}\text{F}$ NMR spectrum of <b>3d</b> .                                                     | 59 |
| <b>Figure S27.</b> $^1\text{H}$ - $^{13}\text{C}$ HMBC NMR spectrum of <b>3d</b> . Labelled peak correlates to C5. | 60 |
| <b>Figure S28.</b> $^1\text{H}$ NMR spectrum of <b>3e</b> .                                                        | 61 |
| <b>Figure S29.</b> $^{13}\text{C}$ NMR spectrum of <b>3e</b> .                                                     | 62 |
| <b>Figure S30.</b> $^{11}\text{B}$ NMR spectrum of <b>3e</b> .                                                     | 63 |
| <b>Figure S31.</b> $^{19}\text{F}$ NMR spectrum of <b>3e</b> .                                                     | 64 |
| <b>Figure S32.</b> $^1\text{H}$ NMR spectrum of <b>3f</b> .                                                        | 65 |
| <b>Figure S33.</b> $^{11}\text{B}$ NMR spectrum of <b>3f</b> .                                                     | 66 |
| <b>Figure S34.</b> $^{19}\text{F}$ NMR spectrum of <b>3f</b> .                                                     | 67 |
| <b>Figure S35.</b> $^1\text{H}$ NMR spectrum of <b>3g</b> .                                                        | 68 |
| <b>Figure S36.</b> $^{13}\text{C}$ NMR spectrum of <b>3g</b> .                                                     | 69 |
| <b>Figure S37.</b> $^{11}\text{B}$ NMR spectrum of <b>3g</b> .                                                     | 70 |
| <b>Figure S38.</b> $^{19}\text{F}$ NMR spectrum of <b>3g</b> .                                                     | 71 |
| <b>Figure S39.</b> $^1\text{H}$ NMR spectrum of <b>3h</b> .                                                        | 72 |
| <b>Figure S40.</b> $^{11}\text{B}$ NMR spectrum of <b>3h</b> .                                                     | 73 |
| <b>Figure S41.</b> $^{19}\text{F}$ NMR spectrum of <b>3h</b> .                                                     | 74 |
| <b>Figure S42.</b> $^1\text{H}$ NMR spectrum of <b>4a</b> .                                                        | 75 |
| <b>Figure S43.</b> $^{13}\text{C}$ NMR spectrum of <b>4a</b> .                                                     | 76 |

|                                                                                                                                    |     |
|------------------------------------------------------------------------------------------------------------------------------------|-----|
| <b>Figure S44.</b> $^{11}\text{B}$ NMR spectrum of <b>4a</b> .                                                                     | 77  |
| <b>Figure S45.</b> $^{19}\text{F}$ NMR spectrum of <b>4a</b> .                                                                     | 78  |
| <b>Figure S46.</b> $^1\text{H}$ - $^{13}\text{C}$ HMBC NMR spectrum of <b>4a</b> . Labelled peak correlates to $\text{C}_i$ (Mes). | 79  |
| <b>Figure S47.</b> $^1\text{H}$ NMR spectrum of <b>4b</b> .                                                                        | 80  |
| <b>Figure S48.</b> $^{13}\text{C}$ NMR spectrum of <b>4b</b> .                                                                     | 81  |
| <b>Figure S49.</b> $^{11}\text{B}$ NMR spectrum of <b>4b</b> .                                                                     | 82  |
| <b>Figure S50.</b> $^{19}\text{F}$ NMR spectrum of <b>4b</b> .                                                                     | 83  |
| <b>Figure S51.</b> $^1\text{H}$ NMR spectrum of <b>4c</b> .                                                                        | 84  |
| <b>Figure S52.</b> $^{13}\text{C}$ NMR spectrum of <b>4c</b> .                                                                     | 85  |
| <b>Figure S53.</b> $^{11}\text{B}$ NMR spectrum of <b>4c</b> .                                                                     | 86  |
| <b>Figure S54.</b> Fluorine-on-boron region in the $^{19}\text{F}$ NMR spectrum of <b>4c</b> .                                     | 87  |
| <b>Figure S55.</b> Fluorine-on-carbon region in the $^{19}\text{F}$ NMR spectrum of <b>4c</b> .                                    | 88  |
| <b>Figure S56.</b> $^1\text{H}$ NMR spectrum of <b>4d</b> .                                                                        | 89  |
| <b>Figure S57.</b> $^{13}\text{C}$ NMR spectrum of <b>4d</b> .                                                                     | 90  |
| <b>Figure S58.</b> $^{11}\text{B}$ NMR spectrum of <b>4d</b> .                                                                     | 91  |
| <b>Figure S59.</b> Fluorine-on-boron region in the $^{19}\text{F}$ NMR spectrum of <b>4d</b> .                                     | 92  |
| <b>Figure S60.</b> Fluorine-on-carbon region in the $^{19}\text{F}$ NMR spectrum of <b>4d</b> .                                    | 93  |
| <b>Figure S61.</b> $^1\text{H}$ NMR spectrum of <b>5a</b> .                                                                        | 94  |
| <b>Figure S62.</b> $^{13}\text{C}$ NMR spectrum of <b>5a</b> .                                                                     | 95  |
| <b>Figure S63.</b> $^{11}\text{B}$ NMR spectrum of <b>5a</b> .                                                                     | 96  |
| <b>Figure S64.</b> $^1\text{H}$ NMR spectrum of <b>5b</b> .                                                                        | 97  |
| <b>Figure S65.</b> $^{13}\text{C}$ NMR spectrum of <b>5b</b> .                                                                     | 98  |
| <b>Figure S66.</b> $^{11}\text{B}$ NMR spectrum of <b>5b</b> .                                                                     | 99  |
| <b>Figure S67.</b> $^1\text{H}$ NMR spectrum of <b>5c</b> .                                                                        | 100 |

|                                                                                                                                                                                                             |     |
|-------------------------------------------------------------------------------------------------------------------------------------------------------------------------------------------------------------|-----|
| <b>Figure S68.</b> $^{13}\text{C}$ NMR spectrum of <b>5c</b> .....                                                                                                                                          | 101 |
| <b>Figure S69.</b> $^{11}\text{B}$ NMR spectrum of <b>5c</b> .....                                                                                                                                          | 102 |
| <b>Figure S70.</b> $^1\text{H}$ NMR spectrum of <b>6</b> .....                                                                                                                                              | 103 |
| <b>Figure S71.</b> $^{13}\text{C}$ NMR spectrum of <b>6</b> .....                                                                                                                                           | 104 |
| <b>Figure S72.</b> $^{11}\text{B}$ NMR spectrum of <b>6</b> .....                                                                                                                                           | 105 |
| <b>Figure S73.</b> $^1\text{H}$ NMR spectrum of $\text{BBr}_3 \cdot \text{NMe}_2\text{Ph}$ .....                                                                                                            | 106 |
| <b>Figure S74.</b> $^{13}\text{C}$ NMR spectrum of $\text{BBr}_3 \cdot \text{NMe}_2\text{Ph}$ .....                                                                                                         | 107 |
| <b>Figure S75.</b> $^{11}\text{B}$ NMR spectrum of $\text{BBr}_3 \cdot \text{NMe}_2\text{Ph}$ .....                                                                                                         | 108 |
| <b>Figure S76.</b> $^1\text{H}$ NMR spectrum of $\text{BBr}_3 \cdot \text{NMe}_2(4\text{-C}_6\text{H}_4\text{SiMe}_3)$ .....                                                                                | 109 |
| <b>Figure S77.</b> $^{13}\text{C}$ NMR spectrum of $\text{BBr}_3 \cdot \text{NMe}_2(4\text{-C}_6\text{H}_4\text{SiMe}_3)$ .....                                                                             | 110 |
| <b>Figure S78.</b> $^{11}\text{B}$ NMR spectrum of $\text{BBr}_3 \cdot \text{NMe}_2(4\text{-C}_6\text{H}_4\text{SiMe}_3)$ .....                                                                             | 111 |
| <b>Figure S79.</b> $^1\text{H}$ NMR spectrum of product mixture from reaction of <b>3b</b> with NaphLi in pentane at $25^\circ\text{C}$ . Asterisks denote $\text{Ph}^*\text{B}(\text{Naph})\text{F}$ ..... | 112 |
| <b>Figure S80.</b> $^{11}\text{B}$ NMR spectrum of product mixture from reaction of <b>3b</b> with NaphLi in pentane at $25^\circ\text{C}$ .....                                                            | 113 |
| <b>Figure S81.</b> $^{19}\text{F}$ NMR spectrum of product mixture from reaction of <b>3b</b> with NaphLi in pentane at $25^\circ\text{C}$ .....                                                            | 114 |

## Experimental methods.

**General methods.** *Caution! Haloboranes are highly corrosive and fluoroboranes potentially release HF on contact with moisture; appropriate safety precautions should be taken.* All reactions were conducted under N<sub>2</sub>, with rigorously anhydrous conditions, using standard Schlenk and glove box techniques. Solvents were distilled from a solvent purification system onto freshly activated 4-Å molecular sieves and degassed briefly under dynamic vacuum. Benzene-*d*<sub>6</sub>, Me<sub>3</sub>SiCl, Me<sub>2</sub>SiHCl, and *N,N*-dimethylaniline were stored over freshly activated 4-Å molecular sieves and degassed with three freeze-pump-thaw cycles. Sodium tetrafluoroborate was finely ground, dried *in vacuo* at 120 °C for 16 h, and stored in the glove box. The following reagents were used as received from Sigma-Aldrich (MilliporeSigma) or Oakwood Products: acenaphthene, 1,4-xylene, *N*-bromosuccinimide, Br<sub>2</sub>, 2-bromomesitylene (MesBr), bromopentamethylbenzene (Ph\*Br), 1-bromonaphthalene (NaphBr), 9-bromoanthracene (AnBr), 1,4-dibromobenzene, benzo[*b*]thiophene, pentafluorobromobenzene, 3,5-bis(trifluoromethyl)-1-bromobenzene (Ar<sup>F</sup>Br), 1,4-bromo-*N,N*-dimethylaniline, <sup>n</sup>BuLi (2.5 M in hexanes), and BBr<sub>3</sub>. The following reagents were prepared using literature methods: 1-bromoacenaphthene,<sup>1</sup> 2,5-dibromo-1,4-xylene,<sup>2</sup> all aryltrimethylsilanes (**1**, except for **1b**),<sup>3–5</sup> 1,4-bis(dibromoboryl)benzene (**2f**),<sup>6</sup> mesityllithium (MesLi),<sup>7</sup> 1-naphthyllithium (NaphLi),<sup>8</sup> and 1,1'-dilithioferrocene (FcLi<sub>2</sub>·tmeda).<sup>9</sup> Solutions of C<sub>6</sub>F<sub>5</sub>MgBr and Ar<sup>F</sup>MgBr were prepared by reacting ArBr and unactivated Mg turnings in Et<sub>2</sub>O (ca. 0.3 M) in the glove box over 1–2 h and were stored at –35 °C in the glove box.

**NMR spectroscopy.** Multi-nuclear NMR spectra were collected using Bruker Avance III HD 400 MHz and Varian VNMRS 500 MHz instruments. Spectra were recorded on C<sub>6</sub>D<sub>6</sub> solutions in 5-mm-o.d. glass NMR tubes equipped with PTFE valves (J. Young) at 298 K and referenced to internal C<sub>6</sub>D<sub>6</sub> (<sup>1</sup>H: 7.15 ppm, <sup>13</sup>C: 128.06 ppm), external BF<sub>3</sub>·OEt<sub>2</sub> (<sup>11</sup>B: 0 ppm) and CFCl<sub>3</sub> (<sup>19</sup>F: 0 ppm). Data were processed and graphics were generated using MestReNova (version 14.2.0).<sup>10</sup>



**X-ray crystallography. *Crystal handling and data acquisition for 3 and 4a–b.***

Crystals were submerged in Paratone-N<sup>TM</sup> oil on microscope slides in a N<sub>2</sub>-filled glove box, transported in sealed vials at –78 °C, and selected under a microscope in a N<sub>2</sub>-filled glove bag positioned near the diffractometer. The selected crystals were affixed to a Hampton cryo-loop using Paratone-N<sup>TM</sup> oil, which was sealed under N<sub>2</sub> with a screw cap before being transferred quickly to the cold N<sub>2</sub> stream at the goniometer. Single-crystal X-ray diffraction data were collected on a Bruker D8 Venture diffractometer with a Metaljet liquid Ga X-ray source ( $\lambda = 1.34139 \text{ \AA}$ ) and Photon II CPAD detector. Data were collected at 150 K under a cold N<sub>2</sub> stream maintained by an Oxford Cryostream 800 cooler, which also protected the sensitive crystals from moisture.

***Crystal handling and data acquisition for 4d.*** Crystals were submerged in Paratone-N<sup>TM</sup> oil on microscope slides in a N<sub>2</sub>-filled glove box, transferred to, and selected under a microscope positioned near the diffractometer quickly, but without further precautions (Note: the crystals were observed to decompose appreciably after ca. 1 h in air). Single-crystal X-ray diffraction data were collected on a Bruker ApexII diffractometer with a Mo X-ray source ( $\lambda = 1.34139 \text{ \AA}$ ) and Photon II CPAD detector. Data were collected at 150 K under a cold N<sub>2</sub> stream maintained by an Oxford Cryostream 1000 cooler, which also protected the sensitive crystals from moisture.

***Crystal handling and data acquisition for 5, 6, and BBr<sub>3</sub>NMe<sub>2</sub>(4-C<sub>6</sub>H<sub>4</sub>R).*** Crystals were submerged in Paratone-N<sup>TM</sup> oil on microscope slides in a N<sub>2</sub>-filled glove box, transferred to, and selected under a microscope positioned near the diffractometer without further precautions. The selected crystals were affixed to a MiteGen loop using Paratone-N<sup>TM</sup> oil and transferred to the goniometer. Data were collected, at 298 K in air, on a Bruker D8 diffractometer with a Cu X-ray source ( $\lambda = 1.54178 \text{ \AA}$ ) and Photon CPAD detector.

***Unit cell determination, integration, and scaling.*** Diffraction data were processed using the Bruker APEX3 software suite. Final unit cells were determined using the difference-vectors or fast Fourier-transform methods to index diffraction spots from ca. 150 frames of data. In the cases of **3c** and **4a**, which were twinned, the unit cells of each twin component were determined using CELL\_NOW; in both cases, the second twin component adopts the same unit cell, rotated ca. 180° around a reciprocal axis with

respect to the first. Data were integrated using SAINT and scaled using SADABS (TWINABS for **3c** and **4a**).

**Structure solution and refinement.** Structure solution and refinement was performed using Olex2 (version 1.5).<sup>11</sup> The structures were solved using intrinsic phasing methods (ShelXT)<sup>12</sup> and refined using least-squares (Gauss-Newton) methods (olex2.refine). For **3**, further refinement employed Hirshfeld atom refinement as implemented in NoSpherA2 (Non-Spherical Atoms in Olex2).<sup>13</sup> Non-spherical atomic scattering factors were generated from Hirshfeld partitioning of the electron density, described by the molecular wavefunction calculated at the  $r^2$ SCAN/cc-pVTZ level of theory using ORCA (version 5.0.4).<sup>14</sup> Least-squares refinement of the crystallographic data was then performed using those scattering factors. Scattering-factor calculations were iterated between refinements until a converged model was achieved, to a maximum of 10 cycles. “Normal” integration accuracy, SCF threshold, and SCF convergence strategy were used to calculate the wavefunction. In all cases, final refinements were conducted with a  $1/\sigma^2(F^2)$  weighting scheme and extinction parameters where appropriate ( $x > 3\sigma(x)$ ).

For **3h**, which exhibited 80/20 rotational disorder about the B–C bond, the atomic displacement parameters (ADPs) of the C2/C2a and B1/B1a pairs were constrained to be equal, and rigid-bond restraints (RIGU) were used for the F1/F1a and F2/F2a pairs. The C–H distances and ADPs of H atoms were refined freely unless stated otherwise. In **3a**, H6a-c were refined isotropically (AFIX 134). In **3b**, 10 of the 15 H atoms were refined using ISOR restraints and the 1,3-distances of H8a-c, H9a-c, and H10a-c were restrained. In **3e**, H1, which exhibited a 50/50 disorder with the BF<sub>2</sub> group, was refined isotropically (AFIX 44). In **3h**, H2 in the minor component had to be refined isotropically with a fixed distance (AFIX 43). In **6**·0.5C<sub>6</sub>H<sub>5</sub>F, the solvent was disordered such that the F atom could not be located and a solvent mask was applied (as implemented in Olex2), which found 104 electrons across 2 voids per unit cell with a total volume of 392 Å<sup>3</sup>. This is consistent with 2 molecules of C<sub>6</sub>H<sub>5</sub>F per unit cell (100 electrons), or 0.5 per asymmetric unit.

Data were deposited in the Cambridge Crystallographic Data Centre, deposition numbers 2292569–2292582 and 2305672. Intermolecular interactions were measured using Mercury (version 2020.3.0)<sup>15</sup> and graphics were generated using Ortep3 (version 2020.1).<sup>16</sup>

**Computational details.** Calculations were performed using the PW6B95 functional with empirical dispersion (D3) and Becke-Johnson damping, denoted PW6B95-D3(BJ), as implemented in Gaussian 16 (revision C.01).<sup>17</sup> Geometry optimisations, vibrational frequency calculations, and isotropic NMR shielding tensor calculations were performed using the def2-TZVP basis set in C<sub>6</sub>H<sub>6</sub> using the SMD implicit solvent model. Chemical shifts were referenced to shielding tensors calculated at the same level for BF<sub>3</sub>·OEt<sub>2</sub> (<sup>11</sup>B: 0 ppm) and CFCl<sub>3</sub> (<sup>19</sup>F: -164.9 ppm).

## Syntheses.

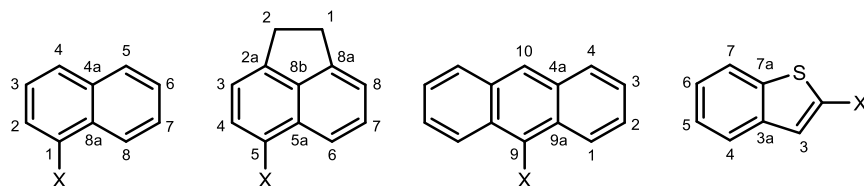

**Figure S1.** Standard numbering schemes for (hetero)aryl groups.

### Synthesis of **1b**.

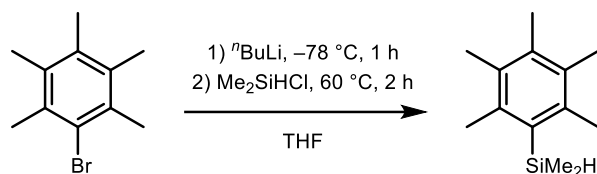

In a 100-mL round-bottom Schlenk flask, Ph\*Br (4.54 g, 20.0 mmol) was dissolved in THF (20 mL) and cooled to  $-78\text{ }^{\circ}\text{C}$ . Subsequently,  $n\text{-BuLi}$  (9.6 mL, 1.2 equiv.) was added dropwise to the solution and the reaction mixture was held at  $-78\text{ }^{\circ}\text{C}$  for 1 h. Chlorodimethylsilane (4.4 mL, 2.0 equiv.) was added in a single portion, the suspension was allowed to warm to ambient temperature, and was then heated to  $60\text{ }^{\circ}\text{C}$  for 2 h, during which a white precipitate formed. The volatiles were removed *in vacuo* and the residue was extracted with  $\text{Et}_2\text{O}$  (20 mL), washed with  $\text{H}_2\text{O}$  (2 x 20 mL), dried over  $\text{MgSO}_4$ , and evaporated, yielding **1b** (4.04 g, 97.9% w.r.t. Ph\*Br) as a white powder that was used without further purification. The  $^1\text{H}$  NMR spectrum agreed with previously reported data.

### Synthesis of **2b**.

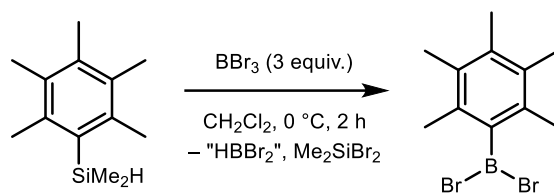

In a 25-mL Schlenk tube, **1b** (2.06 g, 10.0 mmol) was dissolved in  $\text{CH}_2\text{Cl}_2$  (10 mL), cooled to  $0\text{ }^\circ\text{C}$ , and  $\text{BBr}_3$  (2.8 mL, 30 mmol, 3.0 equiv.) was added dropwise with stirring. After 2 h at  $0\text{ }^\circ\text{C}$ , volatile materials were removed under dynamic vacuum, yielding **2b** (2.98 g, 93.9% w.r.t. **1b**) as colourless plates.

$^1\text{H NMR}$  (400 MHz,  $\text{C}_6\text{D}_6$ ):  $\delta$  1.82 (s, 6H, *m*-Me), 1.96 (s, 3H, *p*-Me), 2.09 (s, 5H, *o*-Me).

$^{13}\text{C NMR}$  (126 MHz,  $\text{C}_6\text{D}_6$ ):  $\delta$  14.9 (*m*-Me), 16.2 (*p*-Me), 20.4 (*o*-Me), 130.0 ( $\text{C}_m$ ), 132.5 ( $\text{C}_o$ ), 136.4 ( $\text{C}_p$ ), 140.7 ( $\text{C}_i$ , observed by  $^1\text{H}$ - $^{13}\text{C}$  HMBC).

$^{11}\text{B NMR}$  (128 MHz,  $\text{C}_6\text{D}_6$ ):  $\delta$  62.

### Synthesis of **3**.

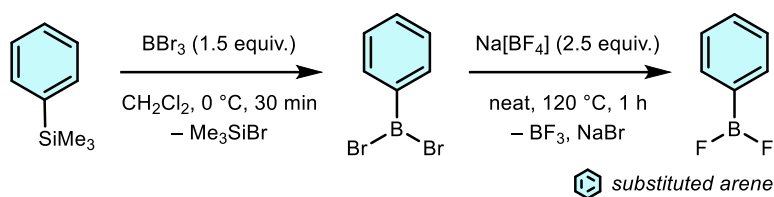

In a 25-mL Schlenk tube, arylsilane **1** (10 mmol) was dissolved in CH<sub>2</sub>Cl<sub>2</sub> (10 mL; 1,2-C<sub>2</sub>H<sub>4</sub>Cl<sub>2</sub> for **1g**), cooled to 0 °C, and BBr<sub>3</sub> (15 mmol, 1.5 equiv. per B atom) was added dropwise with stirring. After 30 min at 0 °C (2 h for **1b**, 2 h at 70 °C in 1,2-dichloroethane for **1g**, 30 min at -78 °C for **1h**), volatile materials were removed under dynamic vacuum, yielding intermediate **2**, and solid Na[BF<sub>4</sub>] (2.5 equiv. per B atom, 8.0 equiv. for **2h**) was added under a positive pressure of N<sub>2</sub>. The Schlenk tube was equipped with a septum and cannula that was fed into a saturated aqueous Na[HCO<sub>3</sub>] bath, and an air stream was pointed half-way up the tube to prevent sublimation into the cannula. The tube was then heated with stirring to 120 °C, resulting in melting and evolution of BF<sub>3</sub>, evidenced by bubbling and fuming in the Na[HCO<sub>3</sub>] bath, as well as slow deposition of crystals on the tube walls. Heating was continued for 1 h or until fuming had ceased. The tube was cooled to 0 °C, traces of BF<sub>3</sub> were removed under dynamic vacuum, and the crude mixture was sublimed under vacuum and/or extracted with pentane to afford **3**.

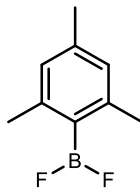

**3a** (84% yield, colourless needles, purified by recrystallisation from pentane). Crystals suitable for X-ray crystallography were obtained via sublimation during the reaction.

**<sup>1</sup>H NMR (500 MHz, C<sub>6</sub>D<sub>6</sub>):** δ 1.96 (s, 3H, *p*-Me), 2.27 (t,  $J_{\text{HF}} = 3.0$  Hz, 6H, *o*-Me), 6.56 (dec,  $^4J_{\text{HH}} = 0.7$  Hz, 2H, H<sub>m</sub>).

**<sup>13</sup>C NMR (126 MHz, C<sub>6</sub>D<sub>6</sub>):** δ 20.9 (*p*-Me), 22.4 (t,  $J_{\text{CF}} = 3.1$  Hz, *o*-Me), 120.3 (C<sub>i</sub>, observed by <sup>1</sup>H-<sup>13</sup>C HMBC), 129.0 (C<sub>m</sub>), 142.6 (C<sub>p</sub>), 146.7 (t,  $J_{\text{CF}} = 2.6$  Hz, C<sub>o</sub>).

**<sup>11</sup>B NMR (128 MHz, C<sub>6</sub>D<sub>6</sub>):** δ 25.9 (t,  $^1J_{\text{BF}} = 75$  Hz).

**<sup>19</sup>F NMR (377 MHz, C<sub>6</sub>D<sub>6</sub>):** δ -70.1 (m).

HRMS data could not be obtained due to immediate decomposition of the solid on contact with moist air.

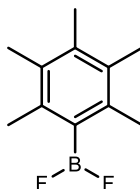

**3b** (89% yield, colourless plates, purified by recrystallisation from pentane). Crystals suitable for X-ray crystallography were obtained upon storing a saturated pentane solution at -35 °C for 16 h.

**<sup>1</sup>H NMR (500 MHz, C<sub>6</sub>D<sub>6</sub>):** δ 1.84 (s, 6H, *m*-Me), 1.92 (s, 3H, *p*-Me), 2.09 (s, 5H, *o*-Me).

**<sup>13</sup>C NMR (126 MHz, C<sub>6</sub>D<sub>6</sub>):** δ 15.4 (*m*-Me), 16.3 (*p*-Me), 20.4 (*o*-Me), 125.6 (C<sub>i</sub>, observed by <sup>1</sup>H-<sup>13</sup>C HMBC), 132.2 (C<sub>m</sub>), 136.2 (C<sub>o</sub>), 137.7 (C<sub>p</sub>).

**<sup>11</sup>B NMR (128 MHz, C<sub>6</sub>D<sub>6</sub>):** δ 27.3 (t,  $^1J_{\text{BF}} = 75$  Hz).

**<sup>19</sup>F NMR (377 MHz, C<sub>6</sub>D<sub>6</sub>):** δ -63.5 (m).

**HRMS (APCI):** *m/z* calcd. for [C<sub>11</sub>H<sub>15</sub>BF<sub>2</sub>]<sup>+</sup> 196.1229; found 196.1232.

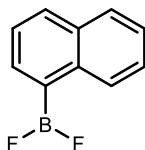

**3c** (81% yield, colourless needles, purified by recrystallisation from pentane). Crystals suitable for X-ray crystallography were obtained via sublimation during the reaction.

**<sup>1</sup>H NMR (400 MHz, C<sub>6</sub>D<sub>6</sub>):** δ 7.03 (dd, *J* = 8.2, 6.9 Hz, 1H, H3), 7.20 (ddd, *J* = 8.1, 6.8, 1.3 Hz, 1H, H7), 7.28 (ddd, *J* = 8.4, 6.8, 1.5 Hz, 1H, H6), 7.51 (dt, *J* = 8.1, 1.1 Hz, 1H, H5), 7.60 (dt, *J* = 8.2, 1.1 Hz, 1H, H4), 7.90 (dd, *J* = 6.9, 1.4 Hz, 1H, H2), 8.42 (d, *J* = 8.5 Hz, 1H, H8).

**<sup>13</sup>C NMR (126 MHz, C<sub>6</sub>D<sub>6</sub>):** δ 120.9 (C1, observed by <sup>1</sup>H-<sup>13</sup>C HMBC), 124.5 (C3), 125.9 (C7), 126.8 (t, *J*<sub>CF</sub> = 4.0 Hz, C8), 127.4 (obscured by C<sub>6</sub>D<sub>6</sub>, C6), 128.7 (C5), 133.3 (C8a), 134.7 (C4), 137.1 (C4a), 138.7 (t, *J*<sub>CF</sub> = 6.0 Hz, C2).

**<sup>11</sup>B NMR (128 MHz, C<sub>6</sub>D<sub>6</sub>):** δ 25.3 (t, <sup>1</sup>*J*<sub>BF</sub> = ca. 75 Hz).

**<sup>19</sup>F NMR (377 MHz, C<sub>6</sub>D<sub>6</sub>):** δ -82.7 (m).

HRMS data could not be obtained due to immediate decomposition of the solid on contact with moist air.



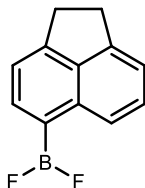

**3d** (80% yield, colourless needles, purified by recrystallisation from pentane). Crystals suitable for X-ray crystallography were obtained by slow evaporation of a saturated pentane solution at ambient temperature.

**$^1\text{H}$  NMR (400 MHz,  $\text{C}_6\text{D}_6$ ):**  $\delta$  2.80 (m, 2H, H2), 2.84 (m, 2H, H1), 6.88 (d,  $J = 7.0$  Hz, 1H, H3), 7.04 (d,  $J = 6.9$  Hz, 1H, H8), 7.35 (dd,  $J = 8.4, 6.9$  Hz, 1H, H7), 7.99 (d,  $J = 7.0$  Hz, 1H, H4), 8.19 (d,  $J = 8.4$  Hz, 1H, H6).

**$^{13}\text{C}$  NMR (101 MHz,  $\text{C}_6\text{D}_6$ ):**  $\delta$  29.73 (C1), 30.31 (C2), 116.3 (C5, observed by  $^1\text{H}$ - $^{13}\text{C}$  HMBC) 118.6 (C3), 119.7 (C8), 122.5 (t,  $J_{\text{CF}} = 3.3$  Hz, C6), 129.5 (C7), 135.8 (t,  $J_{\text{CF}} = 2.3$  Hz, C5a), 139.0 (C8b), 140.82 (t,  $J_{\text{CF}} = 6.0$  Hz, C4), 146.4 (C8a), 154.0 (C2a).

**$^{11}\text{B}$  NMR (128 MHz,  $\text{C}_6\text{D}_6$ ):**  $\delta$  25.5 (s).

**$^{19}\text{F}$  NMR (377 MHz,  $\text{C}_6\text{D}_6$ ):**  $\delta$  -85.7 (s).

**HRMS (APCI):**  $m/z$  calcd. for  $[\text{C}_{12}\text{H}_9\text{BF}_2+\text{H}]^+$  203.0838; found 203.0832.

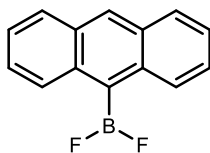

**3e** (54% yield, yellow needles, purified by sublimation at  $2 \times 10^{-2}$  mbar, 2 h followed by recrystallisation from pentane at  $-35$  °C). Crystals suitable for X-ray crystallography were obtained upon storing a saturated pentane solution at  $-35$  °C for 16 h.

**$^1\text{H}$  NMR (400 MHz,  $\text{C}_6\text{D}_6$ ):**  $\delta$  7.20 (m, 4H, H2/H3), 7.68 (d\*,  $J = 8.2$  Hz, 2H, H4), 8.15 (s, 1H, H10), 8.32 (d\*,  $J = 8.8$  Hz, 2H, H1). Asterisk (\*) denotes unresolved fine structure.

**$^{13}\text{C}$  NMR (126 MHz,  $\text{C}_6\text{D}_6$ ):**  $\delta$  137.5 (C4a, t,  $J_{\text{CF}} = 1.5$  Hz), 133.5 (C10), 131.0 (C9a), 129.1 (C4), 127.4 (C3), 127.2 (C1, t,  $J_{\text{CF}} = 4.5$  Hz), 125.0 (C2), n.o. (C9).

**$^{11}\text{B}$  NMR (128 MHz,  $\text{C}_6\text{D}_6$ ):**  $\delta$  27.0 (t,  $^1J_{\text{BF}} = \text{ca. } 70$  Hz).

**$^{19}\text{F}$  NMR (377 MHz,  $\text{C}_6\text{D}_6$ ):**  $\delta$  -63.9 (d).

**HRMS (APCI):**  $m/z$  calcd. for  $[\text{C}_{14}\text{H}_9\text{BF}_2+\text{H}]^+$  227.0838; found 227.0837.

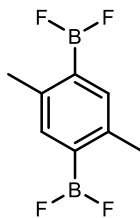

**3g** (79% yield, colourless needles, purified by recrystallisation from pentane). Crystals suitable for X-ray crystallography were obtained via sublimation during the reaction.

**<sup>1</sup>H NMR (400 MHz, C<sub>6</sub>D<sub>6</sub>):** δ 2.16 (s, 6H, Me), 7.41 (s, 2H, H<sub>Ar</sub>).

**<sup>13</sup>C NMR (101 MHz, C<sub>6</sub>D<sub>6</sub>):** δ 20.7 (Me), 128.0 (C<sub>Ar</sub>-B, observed by <sup>1</sup>H-<sup>13</sup>C HMBC) 139.0 (C<sub>Ar</sub>-H), 142.9 (C<sub>Ar</sub>-Me).

**<sup>11</sup>B NMR (128 MHz, C<sub>6</sub>D<sub>6</sub>):** δ 24.8 (s).

**<sup>19</sup>F NMR (377 MHz, C<sub>6</sub>D<sub>6</sub>):** δ -80.9 (s).

HRMS data could not be obtained due to immediate decomposition of the solid on contact with moist air.

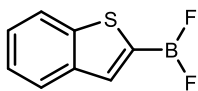

**3h** (31% yield, pale yellow needles, purified by sublimation at 120 °C under an atmosphere of N<sub>2</sub>). Crystals suitable for X-ray crystallography were obtained via sublimation during the reaction. Small amounts of side products co-sublimed with the product and attempts to separate them via crystallisation were unsuccessful.

**<sup>1</sup>H NMR (400 MHz, C<sub>6</sub>D<sub>6</sub>):** δ 7.03 (m, 2H, H<sub>5/6</sub>), 7.44 (m, 2H, H<sub>4/7</sub>), 7.62 (s, 1H, H<sub>3</sub>).

**<sup>11</sup>B NMR (128 MHz, C<sub>6</sub>D<sub>6</sub>):** δ 23.3 (s).

**<sup>19</sup>F NMR (377 MHz, C<sub>6</sub>D<sub>6</sub>):** δ -88.1 (m).

**HRMS (APCI):** m/z calcd. for [C<sub>8</sub>H<sub>5</sub>BF<sub>2</sub>S]<sup>+</sup> 182.0168; found 182.0175.

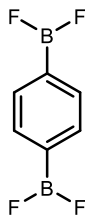

**NMR-scale synthesis of 3f.** This reaction is a modification of that given above for **3**. In the glove box, a 5-mm o.d. NMR tube equipped with a J. Young PTFE valve was charged with **2f** (0.0060 g, 0.014 mmol) and Na[BF<sub>4</sub>] (0.0181 g, 0.165 mmol, 11 equiv.). The tube was connected to a high-vacuum Schlenk line, cooled to -60 °C, and evacuated. It was then closed and heated to 120 °C for 1 h under static vacuum, during which colourless needles deposited on the reactor walls. The tube was then cooled to -60 °C and evacuated to remove any BF<sub>3</sub> and transferred into the glove box. A small amount of **1f** (0.0024 g, 0.0085 mmol) was added as an internal standard, the solids were suspended in C<sub>6</sub>D<sub>6</sub> (while **1–3f** are soluble, residual Na<sup>+</sup> salts are not), and the yield was determined to be ca. 90% by <sup>1</sup>H NMR spectroscopy.

Small amounts of unreacted **2f** (<sup>11</sup>B: 58.2 ppm) and an incompletely fluorinated intermediate (<sup>11</sup>B: 42.4 ppm, <sup>19</sup>F: -88.2 ppm (d)) were observed by <sup>11</sup>B and <sup>19</sup>F NMR spectroscopy. The slightly decreased yield is attributed to **2f** remaining on the reactor walls above the mixture during the reaction, as well as co-sublimation of the intermediate with the product under static vacuum.

**<sup>1</sup>H NMR (400 MHz, C<sub>6</sub>D<sub>6</sub>):** δ 7.46 (s).

**<sup>13</sup>C NMR (101 MHz, C<sub>6</sub>D<sub>6</sub>):** δ 135.2 (t, J<sub>CF</sub> = 4.7 Hz, C-H), n.o. (C-B)

**<sup>11</sup>B NMR (128 MHz, C<sub>6</sub>D<sub>6</sub>):** δ 24.5 (s).

**<sup>19</sup>F NMR (377 MHz, C<sub>6</sub>D<sub>6</sub>):** δ -88.8 (d).

### Synthesis of **4**.

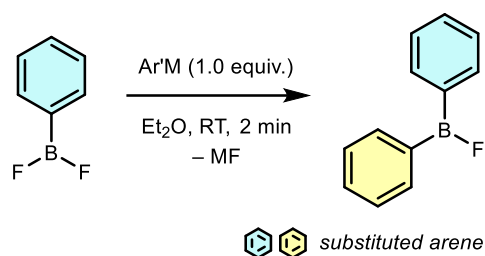

**Using solid MesLi.** In the glove box, a vial was charged with solid **3** (0.20 mmol) and MesLi (0.22 mmol, 1.1 equiv.). Diethyl ether (ca. 0.5 mL) was added, the vial was shaken for 2 min, and the resulting suspension was filtered through cotton into a new vial. The Et<sub>2</sub>O was evaporated, and the solid was extracted and crystallised from benzene by slow evaporation, yielding **4**.

**Using ethereal C<sub>6</sub>F<sub>5</sub>MgBr.** In the glove box, a vial was charged with solid **3** (0.20 mmol) and Et<sub>2</sub>O (ca. 0.5 mL), after which C<sub>6</sub>F<sub>5</sub>MgBr (0.32 M in Et<sub>2</sub>O) was added dropwise. The vial was shaken for 2 min, and the resulting suspension was filtered through Celite into a new vial. The Et<sub>2</sub>O was evaporated, and the solid was extracted and crystallised from benzene/pentane by slow evaporation, yielding **4**.

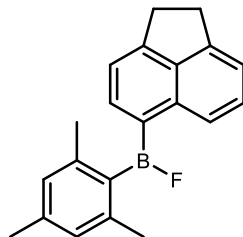

**4a** (99% yield, colourless needles). Crystals suitable for X-ray crystallography were obtained via slow evaporation of a saturated Et<sub>2</sub>O solution at ambient temperature.

**<sup>1</sup>H NMR (400 MHz, C<sub>6</sub>D<sub>6</sub>):** δ 2.20 (s, 3H, *p*-Me (Mes)), 2.28 (d, *J* = 1.8 Hz, 6H, *o*-Me (Mes)), 2.86 (m, 2H, H<sub>2</sub> (Ace)), 2.92 (m, 2H, H<sub>1</sub> (Ace)), 6.79 (s, 2H, H<sub>m</sub> (Mes)), 6.99 (d\*, *J* = 7.0 Hz, 1H, H<sub>3</sub> (Ace)), 7.09 (d\*, *J* = 6.9 Hz, 1H, H<sub>8</sub> (Ace)), 7.40 (dd, *J* = 8.4, 6.9 Hz, 1H, H<sub>7</sub> (Ace)), 8.15 (d, *J* = 7.0 Hz, 1H, H<sub>4</sub> (Ace)), 8.57 (d, *J* = 8.4 Hz, 1H, H<sub>6</sub> (Ace)). Asterisk (\*) denotes unresolved fine structure.

**<sup>13</sup>C NMR (101 MHz, C<sub>6</sub>D<sub>6</sub>):** δ 21.0 (*p*-Me (Mes)), 22.0 (*o*-Me (Mes)), 29.9 (C<sub>1</sub> (Ace)), 30.4 (C<sub>2</sub> (Ace)), 119.1 (C<sub>3</sub> (Ace)), 119.8 (C<sub>8</sub> (Ace)), 123.2 (d, *J*<sub>CF</sub> = 6.6 Hz, C<sub>6</sub> (Ace)), 127.6 (C<sub>m</sub> (Mes)), 129.5 (C<sub>7</sub> (Ace)), 135.3 (C<sub>i</sub> (Mes), observed by <sup>1</sup>H-<sup>13</sup>C HMBC), 135.8 (C<sub>5a</sub> (Ace)), 138.5 (C<sub>p</sub> (Mes)), 139.4 (C<sub>8b</sub> (Ace)), 139.7 (d, *J*<sub>CF</sub> = 2.6 Hz, C<sub>o</sub> (Mes)), 143.2 (d, *J*<sub>CF</sub> = 12.6 Hz, C<sub>4</sub> (Ace)), 146.3 (C<sub>8a</sub> (Ace)), 153.8 (C<sub>2a</sub> (Ace)), n.o. (C<sub>5</sub> (Ace)).

**<sup>11</sup>B NMR (128 MHz, C<sub>6</sub>D<sub>6</sub>):** δ 52 (Δ<sub>v</sub><sup>1/2</sup> = 750 Hz).

**<sup>19</sup>F NMR (377 MHz, C<sub>6</sub>D<sub>6</sub>):** δ -35.9.

**HRMS (APCI):** *m/z* calcd. for [C<sub>21</sub>H<sub>20</sub>BF]<sup>+</sup> 302.1637; found 302.1635.

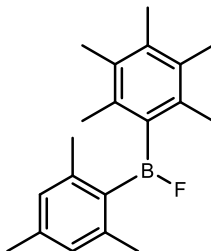

**4b** (97% yield, colourless needles). Crystals suitable for X-ray crystallography were obtained via slow evaporation of a saturated pentane solution at ambient temperature.

**<sup>1</sup>H NMR (400 MHz, C<sub>6</sub>D<sub>6</sub>):** δ 1.98 (s, 6H, *m*-Me (Ph<sup>\*</sup>)), 2.06 (s, 3H, *p*-Me (Ph<sup>\*</sup>)), 2.08 (s, 3H, *p*-Me (Mes)), 2.22 (d, *J*<sub>BF</sub> = 2.2 Hz, 6H, *o*-Me (Ph<sup>\*</sup>)), 2.42 (d, *J*<sub>BF</sub> = 3.1 Hz, 6H, *o*-Me (Mes)), 6.73 (s, 2H, H<sub>m</sub> (Mes)).

**<sup>13</sup>C NMR (101 MHz, C<sub>6</sub>D<sub>6</sub>):** δ 15.4 (*m*-Me (Ph<sup>\*</sup>)), 16.9 (*p*-Me (Ph<sup>\*</sup>)), 20.2 (*o*-Me (Ph<sup>\*</sup>)), 21.0 (*p*-Me (Mes)), 22.9 (d, *J* = 3.3 Hz, *o*-Me (Mes)), 129.3 (C<sub>m</sub> (Mes)), 132.2 (C<sub>m</sub> (Ph<sup>\*</sup>)), 134.5 (d, *J*<sub>CF</sub> = 2.9 Hz, C<sub>o</sub> (Ph<sup>\*</sup>)), 136.0 (d, *J*<sub>CF</sub> = 1.8 Hz, C<sub>p</sub> (Ph<sup>\*</sup>)), 138.2 (C<sub>p</sub> (Mes)), 138.4 (C<sub>i</sub> (Ph<sup>\*</sup>)), 141.3 (C<sub>i</sub> (Mes)), 144.9 (d, *J*<sub>CF</sub> = 4.6 Hz, C<sub>o</sub> (Mes)).

**<sup>11</sup>B NMR (128 MHz, C<sub>6</sub>D<sub>6</sub>):** δ 53 (Δ*v*<sub>1/2</sub> = 620 Hz).

**<sup>19</sup>F NMR (377 MHz, C<sub>6</sub>D<sub>6</sub>):** δ -13.4.

**HRMS (APCI):** *m/z* calcd. for [C<sub>20</sub>H<sub>26</sub>BF]<sup>+</sup> 296.2106; found 296.2097.

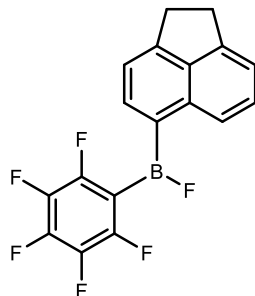

**4c** (92% yield, colourless needles). Crystals suitable for X-ray crystallography were obtained via slow evaporation of a saturated benzene/pentane (1:2) solution at ambient temperature.

**$^1\text{H NMR}$  (400 MHz,  $\text{C}_6\text{D}_6$ ):**  $\delta$  2.83 (m, 2H, H2), 2.89 (m, 2H, H1), 6.98 (d,  $J = 7.1$  Hz, 1H, H3), 7.10 (d,  $J = 7.0$  Hz, 1H, H8), 7.44 (dd,  $J = 8.4, 6.9$  Hz, 1H, H7), 7.83 (d,  $J = 7.0$  Hz, 1H, H4), 8.51 (d,  $J = 8.4$  Hz, 1H, H6).

**$^{13}\text{C NMR}$  (101 MHz,  $\text{C}_6\text{D}_6$ ):**  $\delta$  29.8 (C1 (Ace)), 30.5 (C2 (Ace)), 118.9 (C3 (Ace)), 120.3 (C8 (Ace)), 123.0 (d,  $^3J_{\text{CF}} = 8.2$  Hz, C6 (Ace)), 130.2 (C7 (Ace)), 135.3 (C5a (Ace)), 137.2 (d\*,  $^1J_{\text{CF}} = 253$  Hz, C<sub>m</sub> ( $\text{C}_6\text{F}_5$ )), 139.1 (C8b (Ace)), 142.6 (d\*,  $^1J_{\text{CF}} = 258$  Hz, C<sub>p</sub> ( $\text{C}_6\text{F}_5$ )), 145.1 (d,  $^2J_{\text{CF}} = 13.9$  Hz, C4 (Ace)), 146.6 (C8a (Ace)), 147c.6 (d\*,  $^1J_{\text{CF}} = 248$  Hz, C<sub>o</sub> ( $\text{C}_6\text{F}_5$ )), 156.0 (C2a (Ace)).

**$^{11}\text{B NMR}$  (128 MHz,  $\text{C}_6\text{D}_6$ ):**  $\delta$  47 ( $\Delta\nu_{1/2} = 580$  Hz).

**$^{19}\text{F NMR}$  (377 MHz,  $\text{C}_6\text{D}_6$ ):**  $\delta$  -160.9 (m, F<sub>m</sub> ( $\text{C}_6\text{F}_5$ )), -149.8 (tt,  $J = 20.6, 3.6$  Hz, F<sub>p</sub> ( $\text{C}_6\text{F}_5$ )), -130.6 (m, F<sub>o</sub> ( $\text{C}_6\text{F}_5$ )), -35.9 (BF).

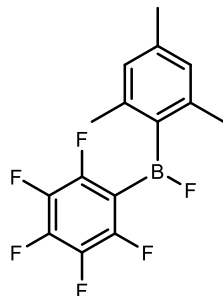

**4d** (95% yield, brown oil).

**$^1\text{H NMR}$  (400 MHz,  $\text{C}_6\text{D}_6$ ):**  $\delta$  2.08 (s, 3H, *p*-Me (Mes)), 2.15 (d,  $J_{\text{HF}} = 2.4$  Hz, 6H, *o*-Me (Mes)), 6.65 (s, 2H,  $H_m$  (Mes)).

**$^{13}\text{C NMR}$  (101 MHz,  $\text{C}_6\text{D}_6$ ):**  $\delta$  20.9 (*p*-Me (Mes)), 21.7 (*o*-Me (Mes)), 108.6 ( $C_i$  ( $\text{C}_6\text{F}_5$ )), 129.0 ( $C_p$  (Mes)), 132.2 ( $C_i$  (Mes)), 137.2 (d,  $J = 252.7$  Hz,  $C_m$  ( $\text{C}_6\text{F}_5$ )), 140.4 ( $C_m$  (Mes)), 140.6 ( $C_o$  (Mes)), 144.1 (d,  $J = 258.1$  Hz,  $C_p$  ( $\text{C}_6\text{F}_5$ )), 149.5 (d,  $J = 251.7$  Hz,  $C_o$  ( $\text{C}_6\text{F}_5$ )).

**$^{11}\text{B NMR}$  (128 MHz,  $\text{C}_6\text{D}_6$ ):**  $\delta$  50 ( $\Delta\nu_{1/2} = 520$  Hz).

**$^{19}\text{F NMR}$  (377 MHz,  $\text{C}_6\text{D}_6$ ):**  $\delta$  -163.0 (m,  $F_m$  ( $\text{C}_6\text{F}_5$ )), -145.9 (ttt,  $J = 21.0, 6.1, 3.1$  Hz,  $F_p$  ( $\text{C}_6\text{F}_5$ )), -131.4 (m,  $F_o$  ( $\text{C}_6\text{F}_5$ )), -17.1 (BF).



## NMR-scale reactions of ArBX<sub>2</sub> with Ar'M.

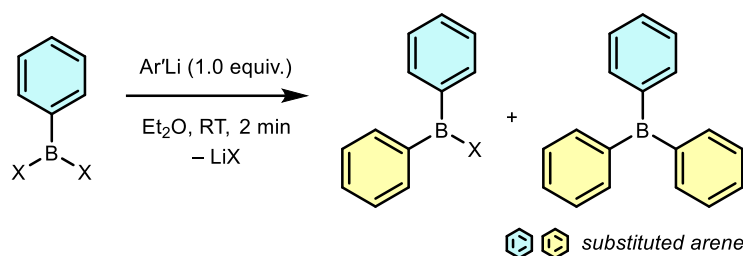

Reactions were generally performed as described for **4** (*vide supra*). The resultant solid mixture was extracted with C<sub>6</sub>D<sub>6</sub>, filtered into an NMR tube, and the ratio of ArAr'BX to BAr(Ar')<sub>2</sub> was measured by <sup>1</sup>H NMR spectroscopy. Assuming quantitative consumption of Ar'M, the relative ratios of the products were ascertained by integrating well separated multiplets in the aromatic region of the <sup>1</sup>H NMR spectra. In all cases, the only resonances in the <sup>11</sup>B and <sup>19</sup>F NMR spectra could be attributed to ArAr'BX, BAr(Ar')<sub>2</sub>, and unreacted ArBX<sub>2</sub>.

**Table S1.** Optimisation of In Situ Synthesis of ArAr'BX from ArBX<sub>2</sub> and Ar'M

| ArBX <sub>2</sub> | Ar'M                               | Solvent                        | T (°C)             | ArAr'BX : BAr(Ar') <sub>2</sub> | NMR yield of ArAr'BX (%) |
|-------------------|------------------------------------|--------------------------------|--------------------|---------------------------------|--------------------------|
| <b>3b</b>         | MesLi                              | Et <sub>2</sub> O              | 25                 | >20 : 1                         | >95                      |
| <b>3d</b>         | MesLi                              | Et <sub>2</sub> O              | 25                 | >20 : 1                         | >95                      |
| <b>3a</b>         | C <sub>6</sub> F <sub>5</sub> MgBr | Et <sub>2</sub> O              | 25                 | >20 : 1                         | >95                      |
| <b>3d</b>         | C <sub>6</sub> F <sub>5</sub> MgBr | Et <sub>2</sub> O              | 25                 | >20 : 1                         | >95                      |
| <b>3b</b>         | NaphLi                             | C <sub>5</sub> H <sub>12</sub> | -35 <sup>[a]</sup> | 3.3 : 1                         | 60                       |
| <b>3b</b>         | NaphLi                             | C <sub>5</sub> H <sub>12</sub> | 25                 | 3.1 : 1                         | 60                       |
| <b>3b</b>         | NaphLi                             | C <sub>6</sub> H <sub>6</sub>  | 25                 | 1.3 : 1                         | 40                       |
| <b>3b</b>         | NaphLi                             | Et <sub>2</sub> O              | 25                 | 1 : 3.9                         | 10                       |
| <b>3a</b>         | NaphLi                             | C <sub>5</sub> H <sub>12</sub> | 25                 | 1.3 : 1                         | 40                       |
| <b>3d</b>         | NaphLi                             | C <sub>5</sub> H <sub>12</sub> | 25                 | 1 : 2.1                         | 20                       |
| <b>3a</b>         | Ar <sup>F</sup> MgBr               | Et <sub>2</sub> O              | 25                 | 6.9 : 1                         | 70                       |
| <b>3d</b>         | Ar <sup>F</sup> MgBr               | Et <sub>2</sub> O              | 25                 | 2.5 : 1 <sup>[b]</sup>          | -- <sup>[b]</sup>        |
| <b>2b</b>         | MesLi                              | C <sub>5</sub> H <sub>12</sub> | 25                 | -- <sup>[c]</sup>               | -- <sup>[c]</sup>        |
| <b>2b</b>         | NaphLi                             | C <sub>5</sub> H <sub>12</sub> | 25                 | 1 : 4.1                         | 10                       |

[a] NaphLi suspended in pentane was added dropwise to **3b** in pentane. [b] Accurate assessment of the yields of ArAr'BF or BArAr'<sub>2</sub> was not possible due to incomplete solubility of the sample in C<sub>6</sub>D<sub>6</sub>, which we attribute to the formation of sparingly soluble Et<sub>2</sub>O adducts. [c] Complex mixture in the <sup>1</sup>H NMR spectrum; resonances could not be unambiguously identified as ArAr'BBr or BArAr'<sub>2</sub>, but large amount of unreacted **2b** remained.

### Synthesis of **5**.

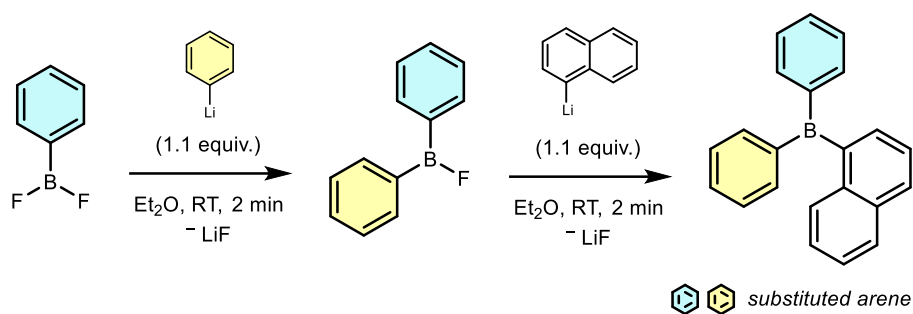

In the glove box, a vial was charged with solid **3** (0.20 mmol) and aryllithium (0.20 mmol, 1.0 equiv. per B atom). Diethyl ether (ca. 0.5 mL) was added, resulting in a white suspension, and the vial was shaken for 2 min, during which some of the precipitate had dissolved. Solid NaphLi (0.22 mmol, 1.1 equiv.) was then added, and the vial was again shaken for 2 min, resulting in a pale violet suspension. The Et<sub>2</sub>O was evaporated, the solid was extracted with benzene, dried, and then recrystallised from pentane or Et<sub>2</sub>O at –35 °C, yielding **5** as colourless crystals.

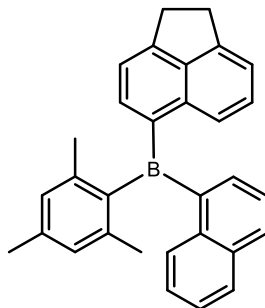

**5a** (91% yield, white powder). Repeated attempts to grow crystals suitable for X-ray crystallography failed, only returning very small, fragile colourless needles and plates.

**$^1\text{H NMR}$  (400 MHz,  $\text{C}_6\text{D}_6$ ):**  $\delta$  2.15 (s, 3H, *p*-Me (Mes)), 2.19 (s, 3H, *o*-Me (Mes)), 2.23 (s, 3H, *o*-Me (Mes)), 2.91 (s, 4H, H1/2 (Ace)), 6.83 (s, 1H,  $\text{H}_m$  (Mes)), 6.84 (s, 1H,  $\text{H}_m$  (Mes)), 6.99 (m, 4H, H3/7/8 (Ace) + H7 (Naph)), 7.15 (m, 1H, H6 (Naph), overlapping with residual solvent signal), 7.27 (dd,  $J = 8.2, 6.9$  Hz, 1H, H3 (Naph)), 7.66 (m, 2H, H6 (Ace) + H5 (Naph)), 7.75 (d\*,  $J = 8.3$  Hz, 1H, H4 (Naph)), 7.82 (dd,  $J = 6.9, 1.3$  Hz, 1H, H2 (Naph)), 7.89 (d,  $J = 7.1$  Hz, 1H, H4 (Ace)), 8.19 (dq,  $J = 8.4, 0.9$  Hz, 1H, H8 (Naph)). Asterisk (\*) denotes unresolved fine structure.

**$^{13}\text{C NMR}$  (101 MHz,  $\text{C}_6\text{D}_6$ ):**  $\delta$  21.0 (*p*-Me (Mes)), 22.8 (*o*-Me (Mes)), 22.9 (*o*-Me (Mes)), 29.9 (C1/2 (Ace)), 30.3 (C1/2 (Ace)), 119.2 (C3 (Ace)), 119.4 (C8 (Ace)), 123.7 (C6 (Ace)), 125.3 (C3 (Naph)), 125.5 (C6 (Naph)), 126.0 (C7 (Naph)), 128.1 ( $\text{C}_m$  (Mes)), 128.2 ( $\text{C}_m$  (Mes)), 128.5 (C7 (Ace)), 128.6 (C5 (Naph)), 129.4 (C8 (Naph)), 131.5 (C4 (Naph)), 133.7 (C8a (Naph)), 134.9 (C2 (Naph)), 135.4 (C5a (Ace)), 136.5 (C4a (Naph)), 137.7 ( $\text{C}_p$  (Mes)), 138.5 ( $\text{C}_o$  (Mes)), 138.6 ( $\text{C}_o$  (Mes)), 139.4 (C8b (Ace)), 139.6 (br, C5 (Ace)), 140.3 (C4 (Ace)), 145.8 (br, C1 (Naph) +  $\text{C}_i$  (Mes)), 146.2 (C8a (Ace)), 151.9 (C2a (Ace)).

**$^{11}\text{B NMR}$  (128 MHz,  $\text{C}_6\text{D}_6$ ):**  $\delta$  73 ( $\Delta\nu_{1/2} = 1340$  Hz).

**HRMS (APCI):**  $m/z$  calcd. For  $[\text{C}_{31}\text{H}_{27}\text{B}]^+$  410.2200; found 410.2222.

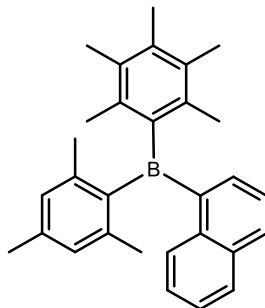

**5b** (94% yield, white powder). Crystals suitable for X-ray crystallography were obtained via slow evaporation of a saturated pentane solution at ambient temperature.

**$^1\text{H}$  NMR (400 MHz,  $\text{C}_6\text{D}_6$ ):**  $\delta$  2.02 (s, 6H, *m*-Me (Ph<sup>\*</sup>)), 2.13 (s, 3H, *p*-Me (Ph<sup>\*</sup>)), 2.15 (s, 3H, *p*-Me (Mes)), 2.16 (s, 6H, *o*-Me (Mes)), 6.76 (s, 2H, H<sub>m</sub> (Mes)), 7.08 (ddd,  $J = 8.4, 6.9, 1.5$  Hz, 1H, H7 (Naph)), 7.19 (m, 2H, H3/H6 (Naph), overlapping with residual solvent signal), 7.63 (m, 1H, H5 (Naph)), 7.71 (m, 2H, H2/H4 (Naph)), 8.28 (dq,  $J = 8.4, 0.9$  Hz, 1H, H8 (Naph)), n.o. (*o*-Me (Ph<sup>\*</sup>)).

**$^{13}\text{C}$  NMR (101 MHz,  $\text{C}_6\text{D}_6$ ):**  $\delta$  15.7 (*m*-Me (Ph<sup>\*</sup>)), 16.6 (*p*-Me (Ph<sup>\*</sup>)), 20.9 (*p*-Me (Mes)), 21.3 (br, *o*-Me (Ph<sup>\*</sup>)) 23.3 (*o*-Me (Mes)), 125.5 (C3 (Naph)), 125.7 (C6 (Naph)), 126.3 (C7 (Naph)), 127.8 (C8 (Naph)), 128.7 (C5 (Naph)), 129.2 (C<sub>m</sub> (Mes)), 131.8 (C4 (Naph)), 132.0 (C<sub>m</sub> (Ph<sup>\*</sup>)), 133.5 (C8a (Naph)), 134.7 (C2 (Naph)), 135.4 (C<sub>p</sub> (Ph<sup>\*</sup>)), 136.2 (C4a (Naph)), 139.2 (C<sub>p</sub> (Mes)), 141.1 (C<sub>o</sub> (Mes)), 143.7 (C<sub>i</sub> (Mes), observed by  $^1\text{H}$ - $^{13}\text{C}$  HMBC), 146.1 (C<sub>i</sub> (Ph<sup>\*</sup>), observed by  $^1\text{H}$ - $^{13}\text{C}$  HMBC), 148.5 (C1 (Naph)), n.o. (C<sub>o</sub> (Ph<sup>\*</sup>)).

**$^{11}\text{B}$  NMR (128 MHz,  $\text{C}_6\text{D}_6$ ):**  $\delta$  75 ( $\Delta\nu_{1/2} = 1200$  Hz).

**HRMS (APCI):**  $m/z$  calcd. for  $[\text{C}_{30}\text{H}_{33}\text{B}+\text{H}]^+$  405.2748; found 410.2748.

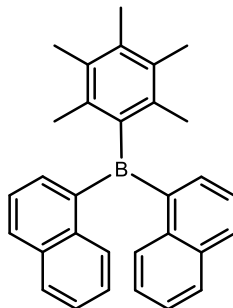

**5c** (99% yield, white powder). Crystals suitable for X-ray crystallography were obtained via slow evaporation of a saturated Et<sub>2</sub>O solution at ambient temperature.

**<sup>1</sup>H NMR (400 MHz, C<sub>6</sub>D<sub>6</sub>):** δ 2.03 (s, 3H, *m*-Me (Ph\*)), 2.16 (s, 1H, *p*-Me (Ph\*)), 2.19 (s, 3H, *o*-Me (Ph\*)), 6.87 (ddd, *J* = 8.4, 6.8, 1.4 Hz, 1H, H7 (Naph)), 7.08 (ddd, *J* = 8.1, 6.8, 1.2 Hz, 1H, H6 (Naph)), 7.24 (dd, *J* = 8.2, 6.9 Hz, 1H, H3 (Naph)), 7.61 (d\*, *J* = 8.2 Hz, 1H, H5 (Naph)), 7.72 (d\*, *J* = 8.3 Hz, 1H, H4 (Naph)), 7.91 (dd, *J* = 6.9, 1.4 Hz, 1H, H2 (Naph)), 8.06 (d\*, *J* = 8.6 Hz, 1H, H8 (Naph)).

**<sup>13</sup>C NMR (126 MHz, C<sub>6</sub>D<sub>6</sub>):** δ 15.4 (*m*-Me (Ph\*)), 16.4 (*p*-Me (Ph\*)), 21.4 (*o*-Me (Ph\*)), 125.3 (C3 (Naph)), 125.6 (C6 (Naph)), 126.2 (C7 (Naph)), 128.6 (C5 (Naph)), 128.9 (C8 (Naph)), 132.1 (C4 (Naph)), 132.1 (C<sub>m</sub> (Ph\*)), 132.9 (C<sub>o</sub> (Ph\*)), 133.7 (C8a (Naph)), 134.6 (C<sub>p</sub> (Ph\*)), 136.2 (C4a (Naph)), 136.3 (C2 (Naph)), 144.9 (C1 (Naph), observed by <sup>1</sup>H-<sup>13</sup>C HMBC), 146.7 (C<sub>i</sub> (Ph\*), observed by <sup>1</sup>H-<sup>13</sup>C HMBC).

**<sup>11</sup>B NMR (128 MHz, C<sub>6</sub>D<sub>6</sub>):** δ 74 (Δ*v*<sub>1/2</sub> = 1200 Hz).

## Synthesis of 6.

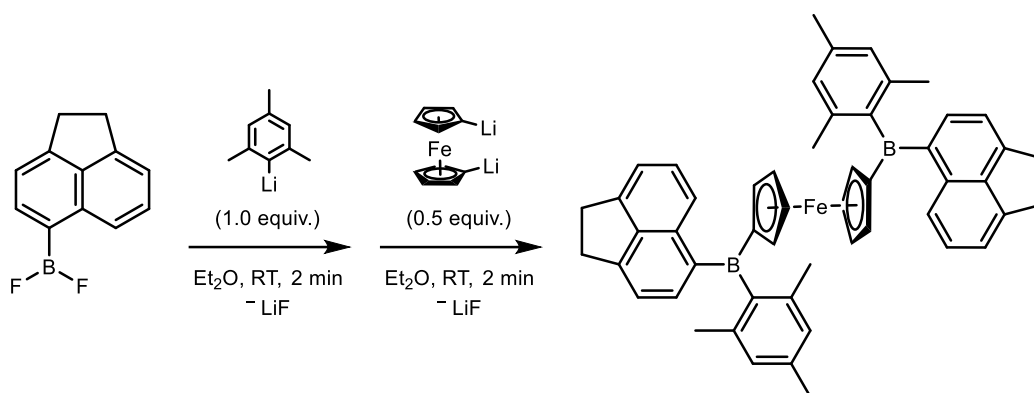

In the glove box, a vial was charged with **3d** (0.0440 g, 0.218 mmol) and MesLi (0.0298 g, 0.236 mmol). Diethyl ether (ca. 0.5 mL) was added, resulting in a white suspension, and the vial was shaken for 2 min, during which most of the precipitate gradually dissolved. A suspension of FcLi<sub>2</sub>-tmeda (0.0304 g, 0.0968 mmol) in Et<sub>2</sub>O (0.5 mL) was added dropwise, resulting in the immediate formation of deep red-violet suspension. The vial was shaken for 2 min, the Et<sub>2</sub>O was evaporated, then the red solid was extracted with fluorobenzene (5 mL) and filtered. Volatile materials were removed from the filtrate under dynamic vacuum and the resultant red gel was washed with pentane (5 mL), affording **6** (0.0701 g, 0.0934 mmol, 96.5% w.r.t. FcLi<sub>2</sub>-tmeda) as a pink powder.

A single crystal of **6**·0.5C<sub>6</sub>H<sub>5</sub>F was found as a small, partially decomposed red block upon evaporation of a saturated fluorobenzene solution at ambient temperature.

**<sup>1</sup>H NMR (400 MHz, C<sub>6</sub>D<sub>6</sub>):** δ 2.25 (s, 12H, *o*-Me (Mes)), 2.27 (s, 6H, *p*-Me (Mes)), 3.02 (s, 8H, H<sub>1/2</sub> (Ace)), 4.71 (t, *J* = 1.9 Hz, 4H, H<sub>Cp</sub> (Fc)), 4.80 (t, *J* = 1.8 Hz, 4H, H<sub>Cp</sub> (Fc)), 6.88 (s, 4H, H<sub>m</sub> (Mes)), 7.04 (d, *J* = 6.8 Hz, 2H, H<sub>8</sub> (Ace)), 7.21 (m, 4H, H<sub>3/7</sub> (Ace)), 8.05 (d, *J* = 8.4 Hz, 2H, H<sub>6</sub> (Ace)), 8.96 (d, *J* = 7.1 Hz, 2H, H<sub>4</sub> (Ace)).

**<sup>13</sup>C NMR (101 MHz, C<sub>6</sub>D<sub>6</sub>):** δ 21.1 (*p*-Me (Mes)), 23.1 (*o*-Me (Mes)), 30.0 (C<sub>1</sub> (Ace)), 30.3 (C<sub>2</sub> (Ace)), 76.1 (C<sub>Cp</sub> (Fc)), 79.3 (C<sub>Cp</sub> (Fc)), 118.9 (C<sub>3</sub> (Ace)), 119.3 (C<sub>8</sub> (Ace)), 123.6 (C<sub>6</sub> (Ace)), 128.2 (C<sub>m</sub> (Mes)), 128.3 (C<sub>7</sub> (Ace)), 135.8 (C<sub>5a</sub> (Ace)), 137.0 (C<sub>p</sub> (Mes)), 137.5 (C<sub>5</sub> (Ace)), 137.8 (C<sub>o</sub> (Mes)), 139.2 (C<sub>8b</sub> (Ace)), 139.7 (C<sub>4</sub> (Ace)), 145.2 (C<sub>i</sub> (Mes)), 146.1 (C<sub>8a</sub> (Ace)), 150.9 (C<sub>2a</sub> (Ace)), n.o. (C<sub>Cp</sub>-B (Fc)).

**<sup>11</sup>B NMR (128 MHz, C<sub>6</sub>D<sub>6</sub>):** δ 72 (Δ*v*<sub>1/2</sub> ~ 3000 Hz).

**HRMS (APCI):** *m/z* calcd. for [C<sub>52</sub>H<sub>48</sub>B<sub>2</sub>Fe]<sup>+</sup> 750.3286; found 750.3310.

### Syntheses of $BBr_3 \cdot NMe_2(4-C_6H_4R)$ ( $R = H, SiMe_3$ ).

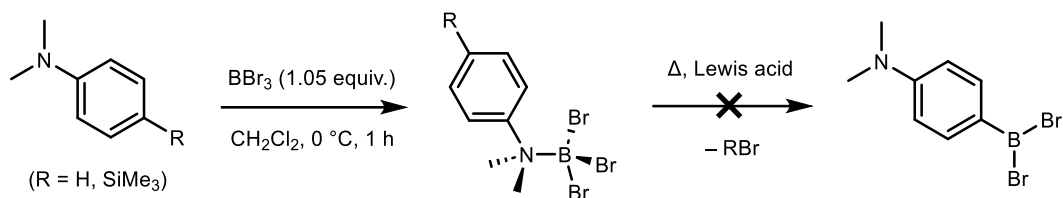

In a 25 mL Schlenk flask, 1,4- $Me_2NC_6H_4R$  (2.0 mmol) was dissolved in  $CH_2Cl_2$  (3 mL) and cooled to  $0\text{ }^\circ\text{C}$ . Boron tribromide (2.1 mmol) was added dropwise, resulting in a pale brown ( $R = H$ ) or yellow ( $R = SiMe_3$ ) solution. The solution was warmed to ambient temperature and stirred for 1 h before volatile materials were removed under dynamic vacuum, affording  $BBr_3 \cdot NMe_2(4-C_6H_4R)$  as white powders containing traces of  $[Me_2(4-RC_6H_4)NH][BBr_4]$ , determined by NMR spectroscopy.

No Si/B or H/B exchange was observed during the reaction, or after heating to  $80\text{ }^\circ\text{C}$  in  $C_6D_6$ , with or without catalytic  $Me_3SiNTf_2$  or  $AlOTf_3$  (10 mol%,  $Tf = SO_2CF_3$ ), despite a previous report of spontaneous H/B exchange to form 1,4- $Me_2NC_6H_4BBR_2$  in the presence of a slight excess of  $BBr_3$ .<sup>18</sup>

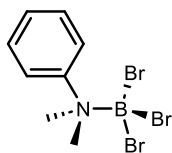

**R = H** (99% yield, off-white powder). Crystals suitable for X-ray crystallography were grown by vapour diffusion of pentane into a saturated fluorobenzene solution at  $-35\text{ }^\circ\text{C}$  over several days.

**$^1H$  NMR (400 MHz,  $C_6D_6$ ):**  $\delta$  2.80 (q,  $^3J_{BH}$ , Me, 6H), 6.87 (m,  $H_o/H_p$ , 3H), 7.16 (m,  $H_m$ , 2H, overlapping with residual solvent signal).

**$^{13}C$  NMR (126 MHz,  $C_6D_6$ ):**  $\delta$  50.6 (Me), 124.4 ( $C_m$ ), 127.5 ( $C_o/C_p$ ), 128.0 ( $C_o/C_p$ ), 144.5 (Ci).

**$^{11}B$  NMR (128 MHz,  $C_6D_6$ ):**  $\delta$   $-2.8$ .

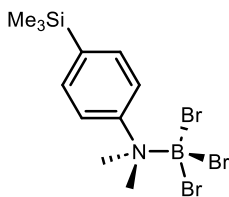

**R = SiMe<sub>3</sub>** (95% yield, off-white powder). Crystals suitable for X-ray crystallography were grown by vapour diffusion of pentane into a saturated fluorobenzene solution at  $-35\text{ }^{\circ}\text{C}$  over several days.

**<sup>1</sup>H NMR (500 MHz, C<sub>6</sub>D<sub>6</sub>):**  $\delta$  0.09 (s, SiMe<sub>3</sub>, 9H), 2.83 (q,  $^3J_{\text{BH}} = 3.0\text{ Hz}$ , NMe<sub>2</sub>, 6H), 7.21 (d,  $^3J_{\text{HH}} = 8.2\text{ Hz}$ , C<sub>o</sub>, 2H), 7.24 (d, C<sub>m</sub>, 2H).

**<sup>13</sup>C NMR (126 MHz, C<sub>6</sub>D<sub>6</sub>):**  $\delta$   $-1.77$  (SiMe<sub>3</sub>), 50.59 (NMe<sub>2</sub>), 123.75 (C<sub>o</sub>), 132.68 (C<sub>m</sub>), 140.89 (C<sub>i</sub>), 145.24 (C<sub>p</sub>).

**<sup>11</sup>B NMR (128 MHz, C<sub>6</sub>D<sub>6</sub>)**  $\delta$   $-2.8$ .



## Experimental and calculated data.

**Table S2.** Calculated  $\Delta G$  and  $\Delta H$  (kcal mol<sup>-1</sup>) for Reactions of **3** with [BF<sub>4</sub>]<sup>-</sup> and FIAs (kcal mol<sup>-1</sup>) of **3**<sup>[a]</sup>

|                       | $\Delta G$ | $\Delta H$ | FIA <sup>[b]</sup>   |
|-----------------------|------------|------------|----------------------|
| <b>BF<sub>3</sub></b> | 0.0        | 0.0        | 345.1 <sup>[c]</sup> |
| <b>3a</b>             | 15.0       | 14.1       | 331.0                |
| <b>3b</b>             | 16.9       | 15.8       | 329.3                |
| <b>3c</b>             | 10.3       | 9.9        | 335.2                |
| <b>3d</b>             | 13.8       | 13.0       | 332.1                |
| <b>3e</b>             | 10.7       | 10.2       | 334.9                |
| <b>3f</b>             | 7.5        | 7.5        | 337.6                |
| <b>3g</b>             | 9.2        | 7.6        | 337.5                |
| <b>3h</b>             | 8.5        | 8.2        | 336.9                |

[a] Calculated at the PW6B95-D3(BJ)/def2-TZVP level of theory in C<sub>6</sub>H<sub>6</sub> (SMD solvent model) at 298 K. [b] Defined as FIA =  $-\Delta H(A + F^- \rightarrow AF^-)$ . **Note:** FIAs are typically calculated in the gas phase without solvation. However, as these reactions are isodesmic, we believe that the calculated trends in FIA should be accurate. [c] From reference X; calculated in the gas phase.

**Table S3.** Experimental and Calculated <sup>11</sup>B and <sup>19</sup>F Chemical Shifts of **3–6**<sup>[a]</sup>

|           | $\delta(^{11}\text{B})$ (ppm) |        | $\delta(^{19}\text{F})$ (ppm) |        |
|-----------|-------------------------------|--------|-------------------------------|--------|
|           | exptl.                        | calcd. | exptl.                        | calcd. |
| <b>3a</b> | 25.9                          | 26.2   | -70.1                         | -65.4  |
| <b>3b</b> | 27.3                          | 29.0   | -63.5                         | -51.5  |
| <b>3c</b> | 25.3                          | 26.1   | -82.7                         | -79.8  |
| <b>3d</b> | 25.5                          | 26.4   | -85.7                         | -83.7  |
| <b>3e</b> | 27.0                          | 29.0   | -63.9                         | -54.1  |
| <b>3f</b> | 24.5                          | 25.7   | -88.8                         | -85.1  |
| <b>3g</b> | 24.8                          | 25.7   | -80.9                         | -75.7  |
| <b>3h</b> | 23.3                          | 24.0   | -88.1                         | -84.8  |
| <b>4a</b> | 52                            | 55.0   | -35.9                         | -20.8  |
| <b>4b</b> | 53                            | 58.5   | -13.4                         | 7.1    |
| <b>4c</b> | 48                            | 47.9   | -35.9                         | -24.7  |
| <b>4d</b> | 50                            | 50.0   | -17.1                         | -6.8   |
| <b>5a</b> | 75                            | 78.4   |                               |        |
| <b>5b</b> | 73                            | 76.0   |                               |        |
| <b>5c</b> | 74                            | 77.7   |                               |        |
| <b>6</b>  | 72                            | 74.2   |                               |        |

[a] Calculated using the GIAO method at the PW6B95-D3(BJ)/aug-cc-pVTZ level of theory in C<sub>6</sub>H<sub>6</sub> (SMD solvent model) at 298 K and averaged for each nuclear environment.

**Table S4.** Selected Experimental and Calculated<sup>[a]</sup> Bond Lengths (in Å) and Angles (in °) of **3** and Related Compounds

|                                          | B–F                      |                | B–C        |        | F–B–F       |        | F(1)–B–C(1)–C(2) |        |
|------------------------------------------|--------------------------|----------------|------------|--------|-------------|--------|------------------|--------|
|                                          | exptl.                   | calcd.         | exptl.     | calcd. | exptl.      | calcd. | exptl.           | calcd. |
| <b>3a</b>                                | 1.3176(7)                | 1.328          | 1.5528(12) | 1.540  | 113.14(8)   | 113.30 | 2.92(3)          | 7.64   |
| <b>3b</b>                                | 1.2965(15)<br>1.3080(15) | 1.327          | 1.5735(17) | 1.548  | 115.21(11)  | 114.13 | 60.58(15)        | 54.67  |
| <b>3c</b>                                | 1.3210(18)<br>1.3252(18) | 1.325<br>1.326 | 1.541(2)   | 1.544  | 114.04(12)  | 114.87 | 2.05(14)         | 0.12   |
| <b>3d</b>                                | 1.3261(14)<br>1.3262(14) | 1.327<br>1.328 | 1.5396(13) | 1.537  | 113.68(9)   | 115.13 | 3.80(12)         | 0.10   |
| <b>3e</b>                                | 1.3207(17)<br>1.3210(16) | 1.326          | 1.6769(15) | 1.548  | 112.09(12)  | 114.22 | 2.77(13)         | 41.48  |
| <b>3f</b>                                |                          | 1.321          |            | 1.546  |             | 116.65 |                  | 0.38   |
| <b>3g</b>                                | 1.3222(15)<br>1.3252(16) | 1.323<br>1.325 | 1.5496(16) | 1.544  | 114.93 (11) | 115.32 | 0.33(14)         | 0.01   |
| <b>3h</b>                                | 1.330(3)<br>1.335(3)     | 1.323          | 1.527(3)   | 1.525  | 115.8(2)    | 116.62 | 1.6(5)           | 0.02   |
| <b>EindBF<sub>2</sub></b> <sup>[b]</sup> | 1.3146(15)               |                | 1.576(3)   |        | 114.78(18)  |        | 76.19(7)         |        |
| <b>TerBF<sub>2</sub></b> <sup>[c]</sup>  | 1.307(2)                 |                | 1.560(2)   |        | 115.43(12)  |        | 72.27(16)        |        |

[a] Calculated at the PW6B95-D3(BJ)/def2-TZVP level of theory in C<sub>6</sub>H<sub>6</sub> (SMD solvent model). [b] From reference 12 of the main text. [c] From reference 13 of the main text.

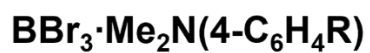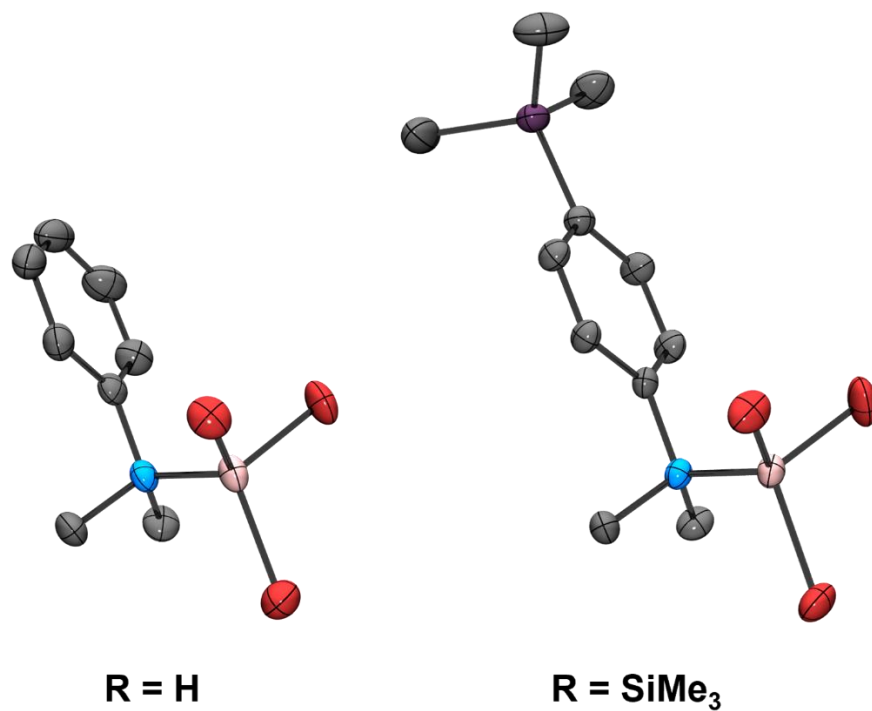

**Figure S2.** Thermal ellipsoid plots (298 K, 30% probability level) of  $\text{BBr}_3 \cdot \text{NMe}_2(4\text{-C}_6\text{H}_4\text{R})$ . Colours denote brown (Br), violet (Si), blue (N), pink (B), and grey (C), with H atoms omitted for clarity.

### Dimerisation Energies (kcal mol<sup>-1</sup>)

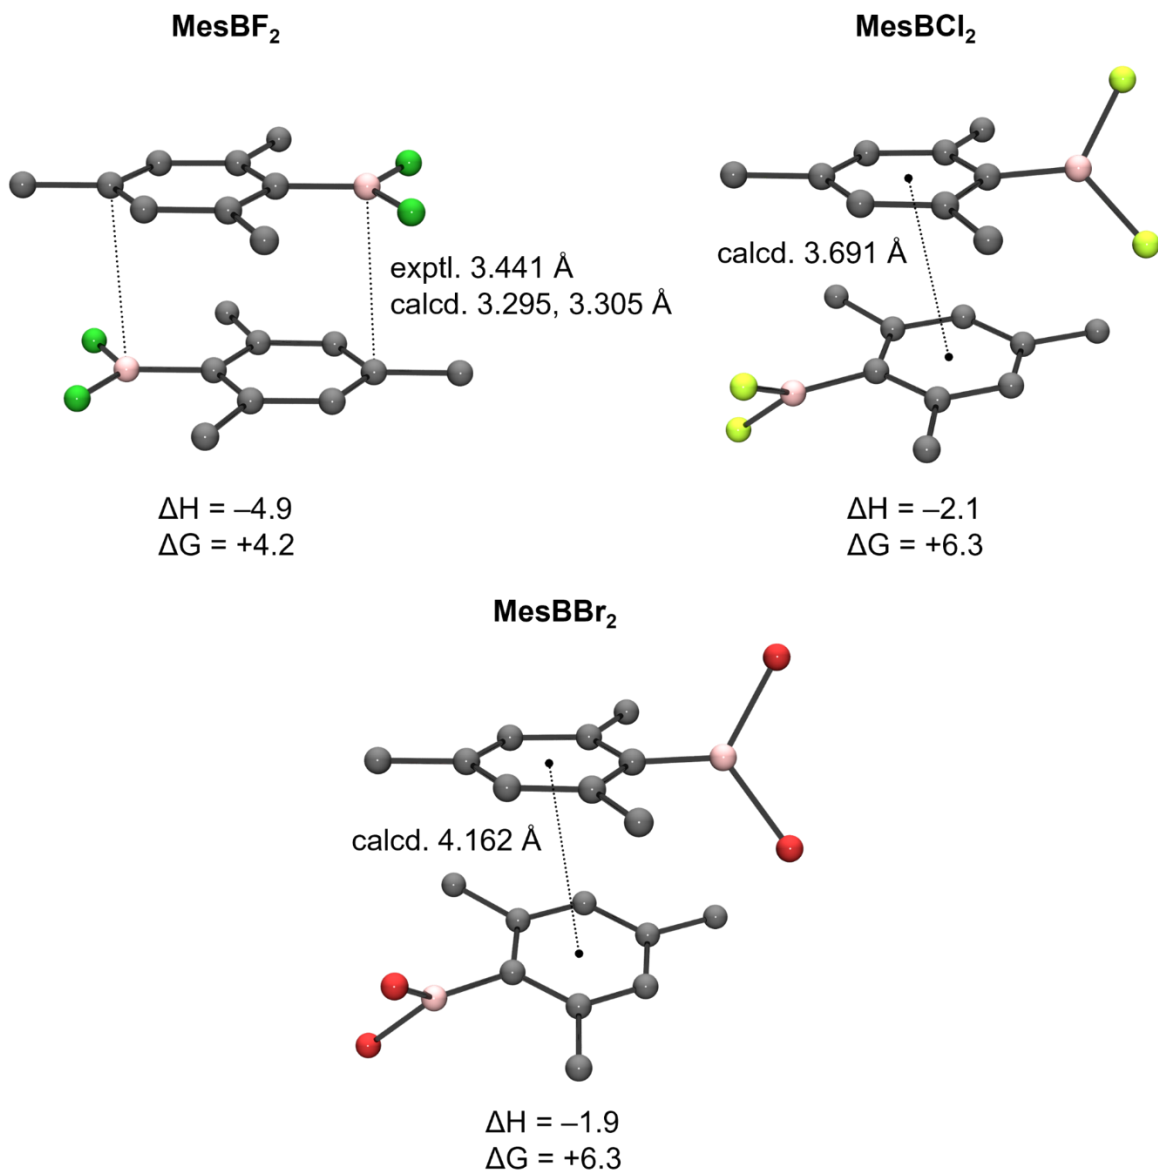

**Figure S3.** Optimised geometries and thermochemical data for calculated (PW6B95-D3(BJ)/def2-TZVP) MesBX<sub>2</sub> dimers. Colours denote brown (Br), yellow-green (Cl), green (F), pink (B), and grey (C), with H atoms omitted for clarity.

**Table S5.** Selected Experimental and Calculated<sup>[a]</sup> Bond Lengths (in Å) and Angles (in °) of **4–6**

|           |                               | B–F      |        | B–C                |        | F–B–C      |        | F–B–C–C |        |
|-----------|-------------------------------|----------|--------|--------------------|--------|------------|--------|---------|--------|
|           |                               | exptl.   | calcd. | exptl.             | calcd. | exptl.     | calcd. | exptl.  | calcd. |
| <b>4a</b> | Ace                           | 1.344(3) | 1.346  | 1.532(4)           | 1.542  | 118.8(2)   | 118.75 | 9.4(3)  | 14.08  |
|           | Mes                           |          |        | 1.577(4)           | 1.563  | 114.4(2)   | 116.50 | 72.7(3) | 60.28  |
| <b>4b</b> | Ph*                           | 1.348(2) | 1.346  | 1.569(3)           | 1.563  | 112.83(15) | 115.85 | 56.3(2) | 65.09  |
|           | Mes                           |          |        | 1.566(2)           | 1.557  | 121.51(16) | 116.86 | 25.4(2) | 38.35  |
| <b>4c</b> | Ace                           | 1.330(3) | 1.335  | 1.543(4)           | 1.529  | 120.6(2)   | 121.07 | 8.7(3)  | 12.41  |
|           | C <sub>6</sub> F <sub>5</sub> |          |        | 1.598(4)           | 1.578  | 114.5(2)   | 114.29 | 56.8(3) | 49.26  |
| <b>4d</b> | Mes                           |          | 1.334  |                    | 1.543  |            | 118.88 |         | 41.15  |
|           | C <sub>6</sub> F <sub>5</sub> |          |        |                    | 1.571  |            | 114.38 |         | 33.33  |
| <b>5a</b> | Ace                           |          |        |                    | 1.554  |            |        |         |        |
|           | Mes                           |          |        |                    | 1.570  |            |        |         |        |
|           | Naph                          |          |        |                    | 1.560  |            |        |         |        |
| <b>5b</b> | Ph*                           |          |        | 1.583(3)           | 1.572  |            |        |         |        |
|           | Mes                           |          |        | 1.583(4)           | 1.569  |            |        |         |        |
|           | Naph                          |          |        | 1.574(3)           | 1.565  |            |        |         |        |
| <b>5c</b> | Ph*                           |          |        | 1.570(4)           | 1.570  |            |        |         |        |
|           | Naph                          |          |        | 1.577(4)           | 1.561  |            |        |         |        |
|           | Naph                          |          |        | 1.567(3)           | 1.560  |            |        |         |        |
| <b>6</b>  | Ace                           |          |        | 1.570(4), 1.569(7) | 1.559  |            |        |         |        |
|           | Mes                           |          |        | 1.584(6), 1.582(7) | 1.573  |            |        |         |        |
|           | Fc                            |          |        | 1.547(6), 1.529(6) | 1.544  |            |        |         |        |

[a] Calculated at the PW6B95-D3(BJ)/def2-TZVP level of theory in C<sub>6</sub>H<sub>6</sub> (SMD solvent model).

**NMR spectra.**

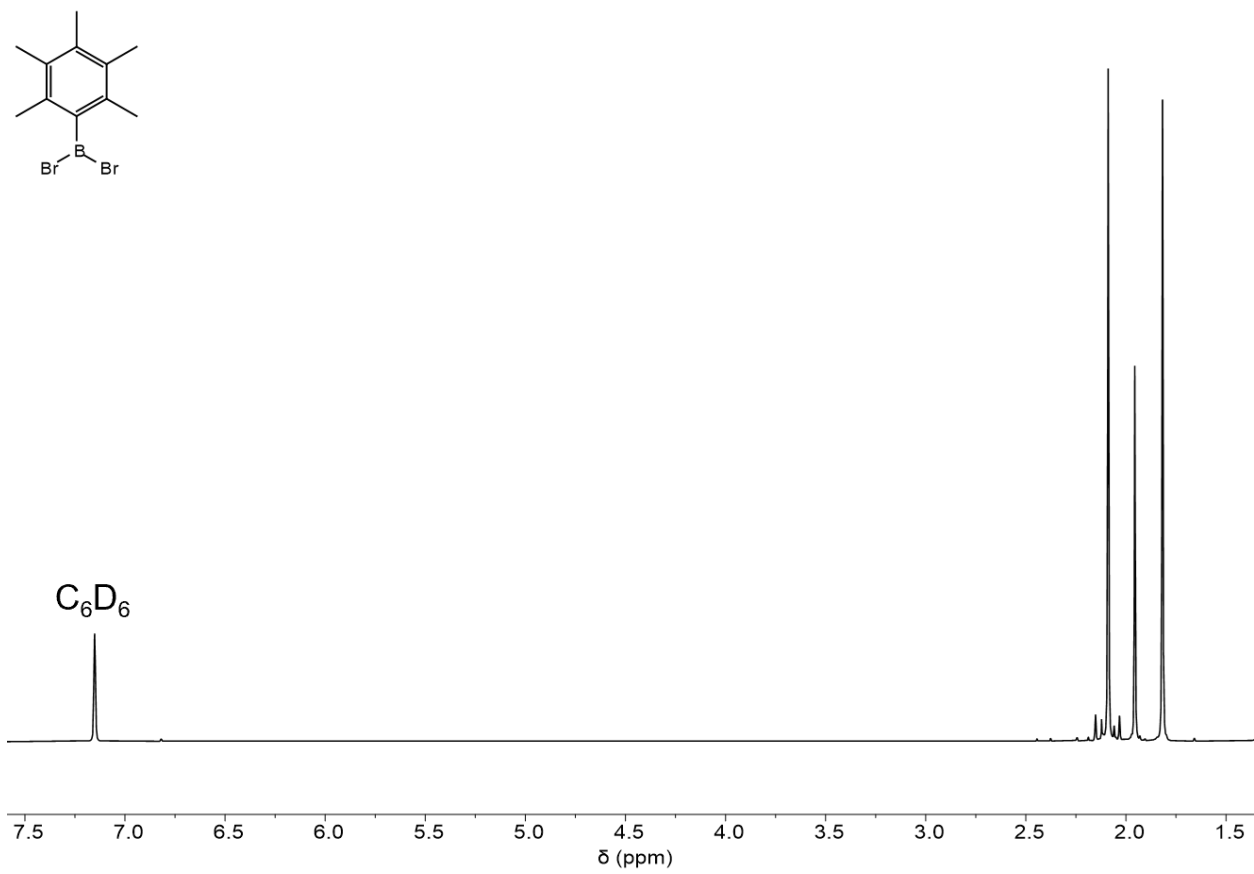

**Figure S4.**  $^1\text{H}$  NMR spectrum of **2b**.

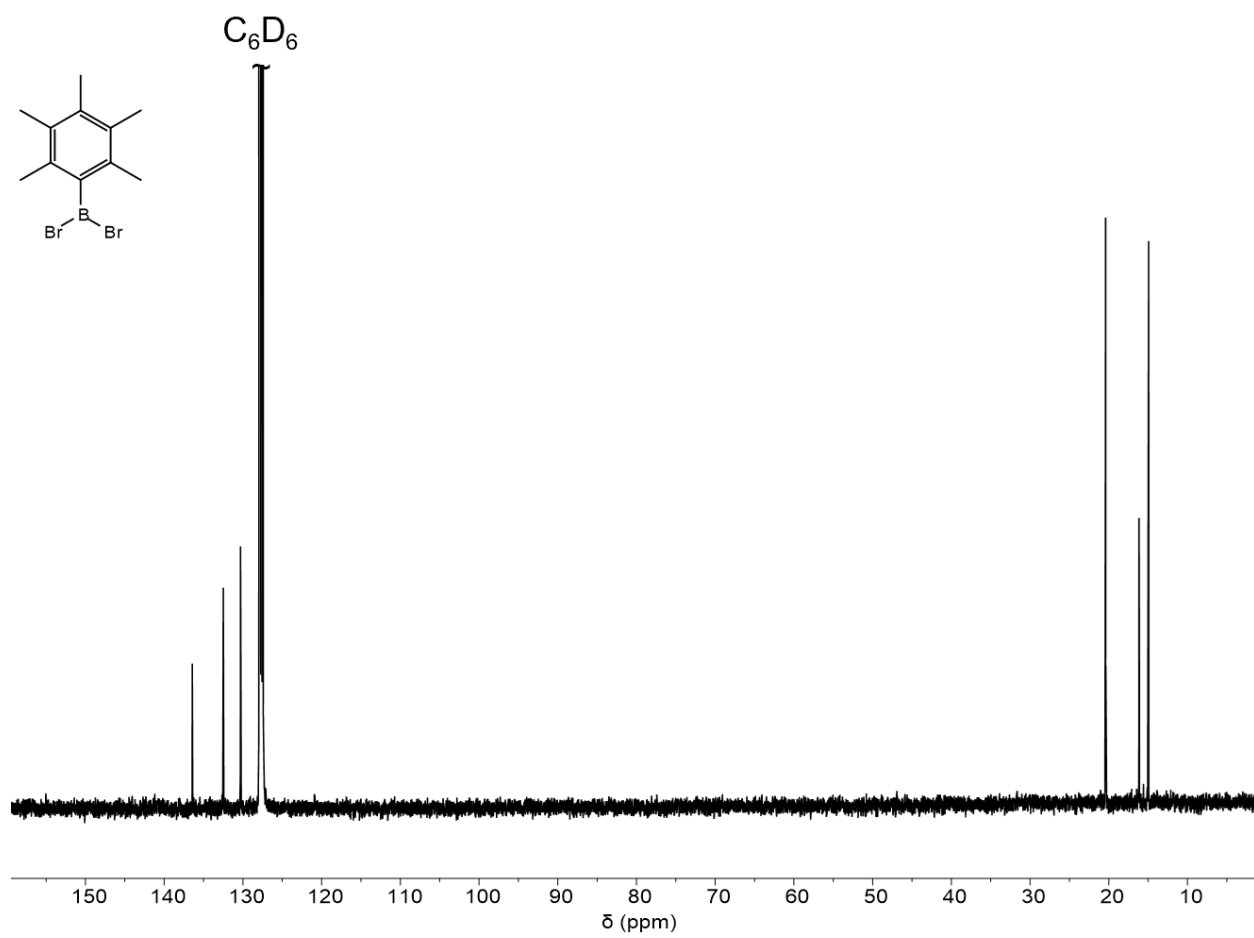

**Figure S5.**  $^{13}\text{C}$  NMR spectrum of **2b**.

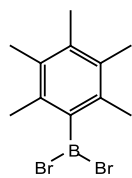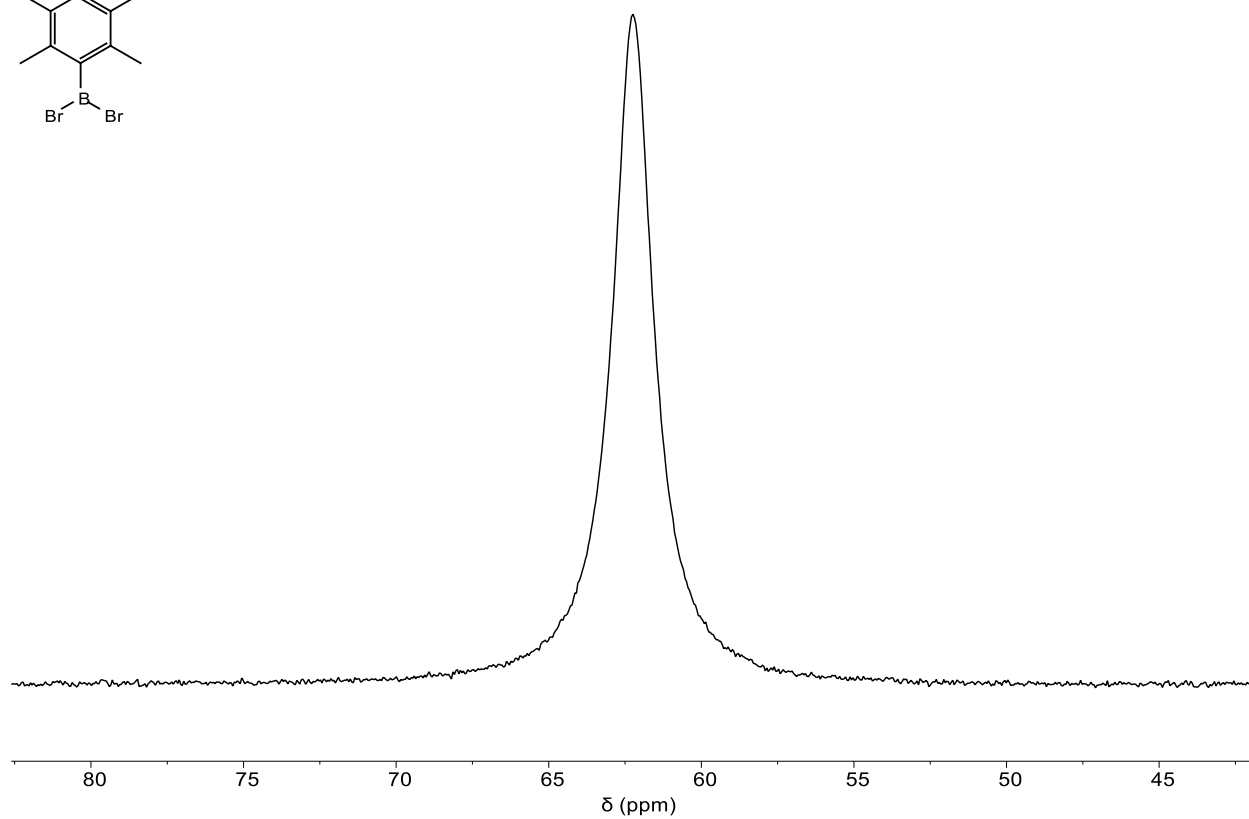

**Figure S6.**  $^{11}\text{B}$  NMR spectrum of **2b**.



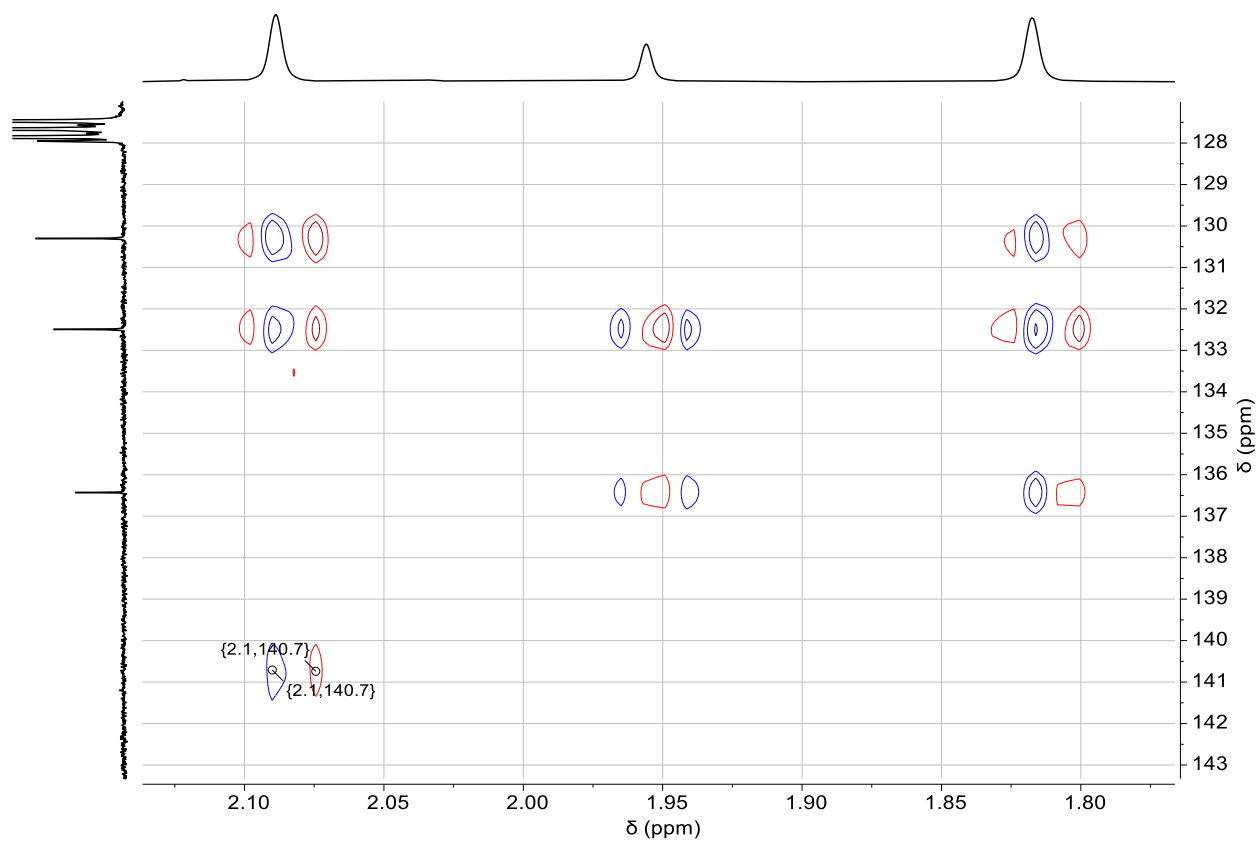

**Figure S7.**  $^1\text{H}$ - $^{13}\text{C}$  HMBC NMR spectrum of **2b**. Labelled peak correlates to the  $\text{C}_i$  atom.

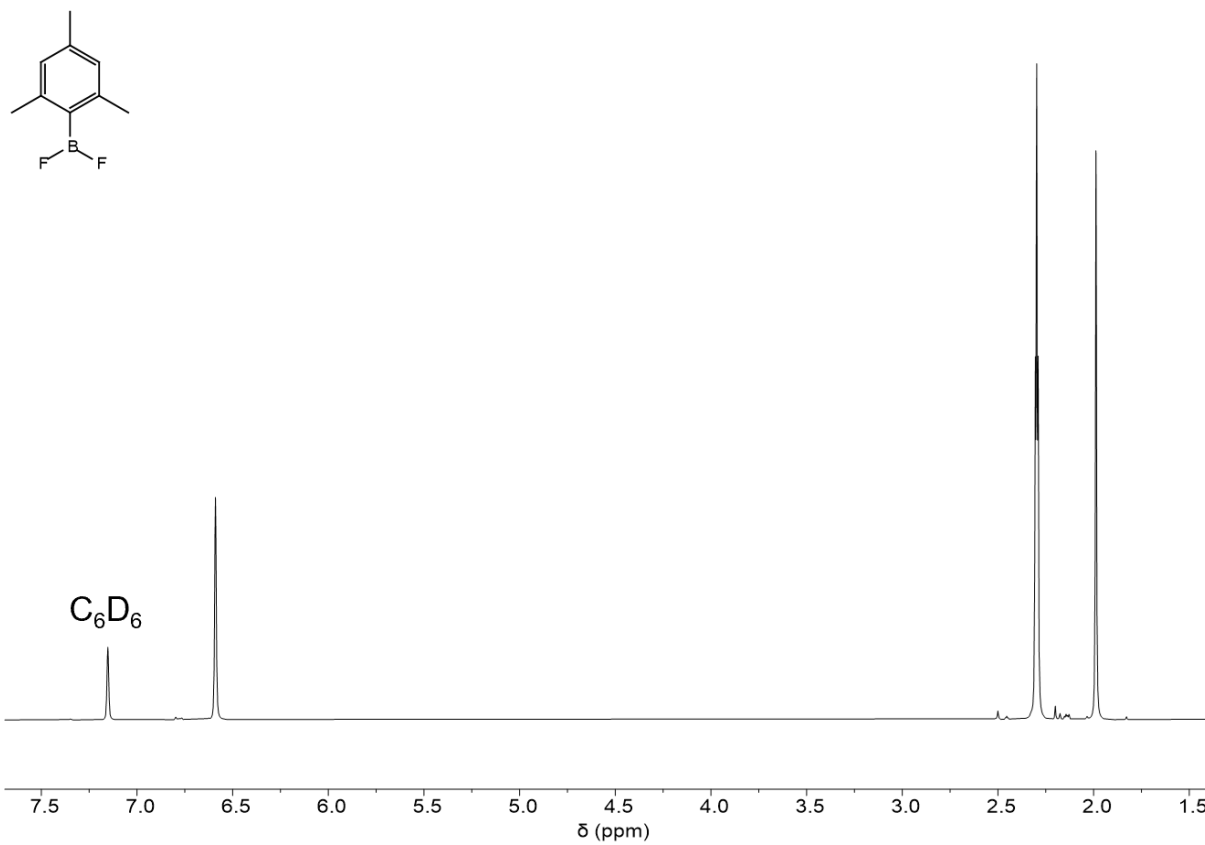

**Figure S8.**  $^1\text{H}$  NMR spectrum of 3a.

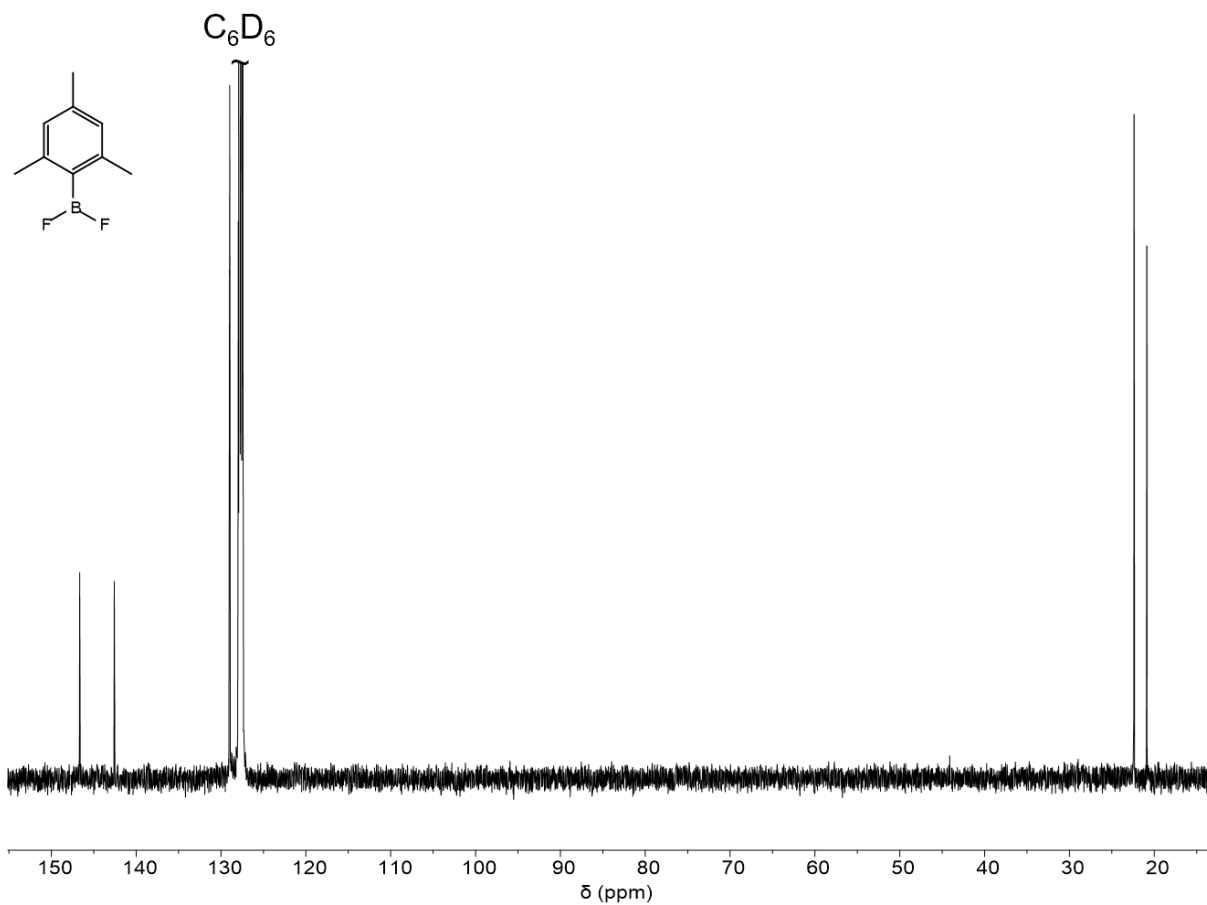

**Figure S9.**  $^{13}\text{C}$  NMR spectrum of **3a**.

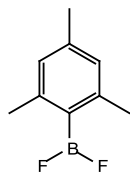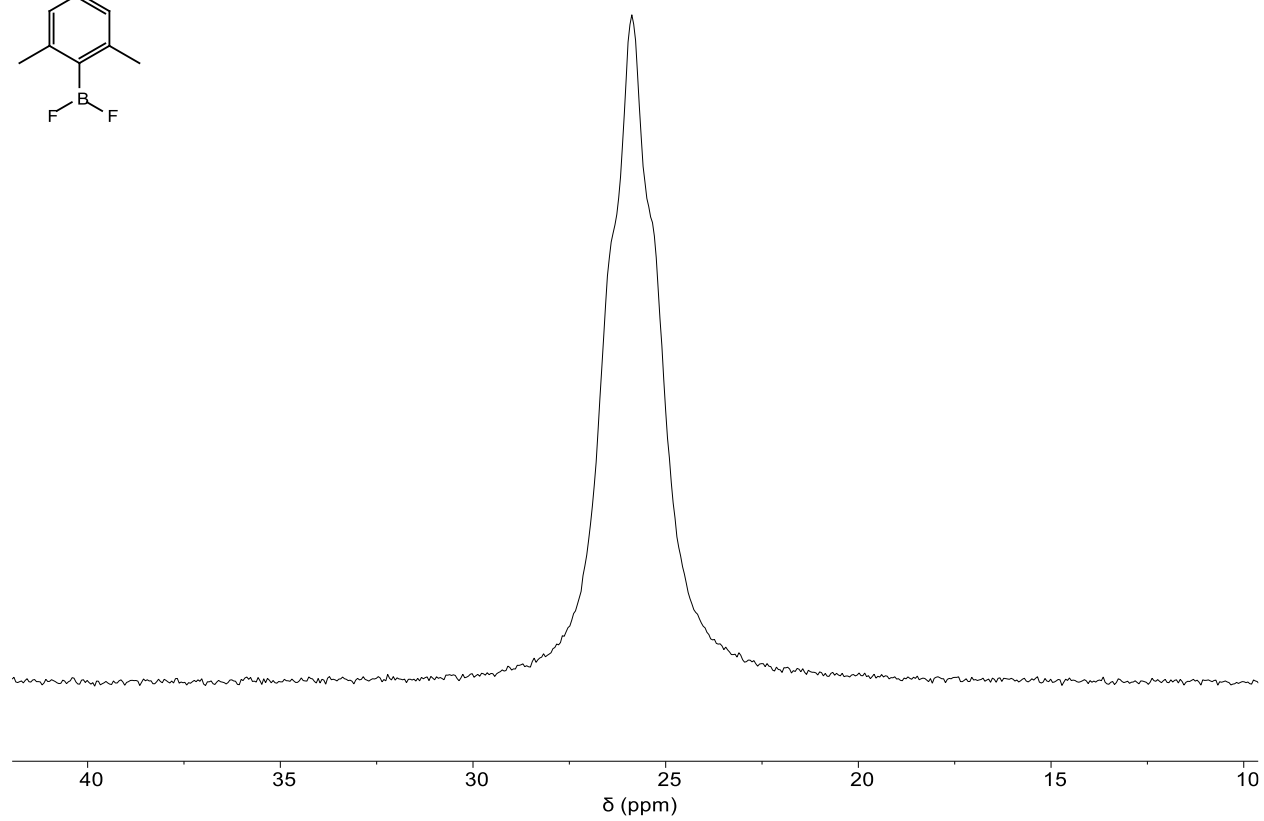

**Figure S10.**  $^{11}\text{B}$  NMR spectrum of **3a**.

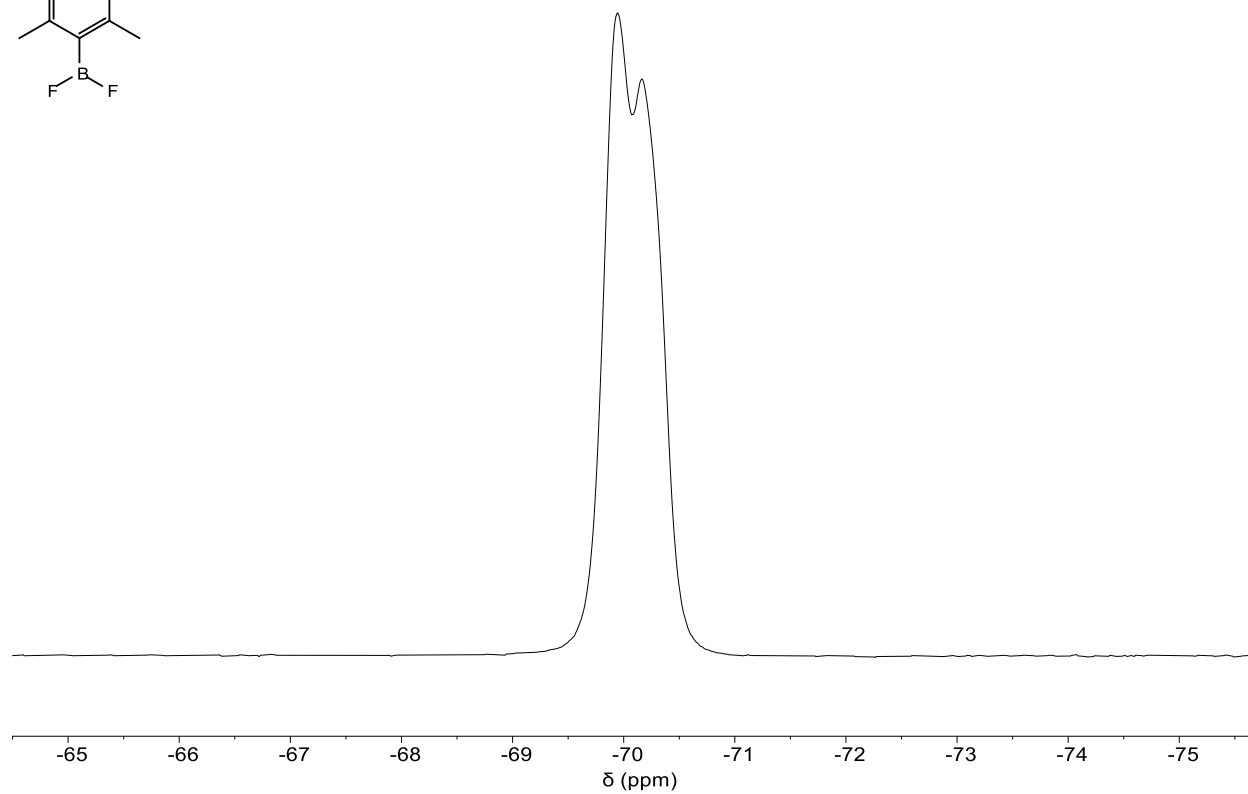

**Figure S11.**  $^{19}\text{F}$  NMR spectrum of **3a**.

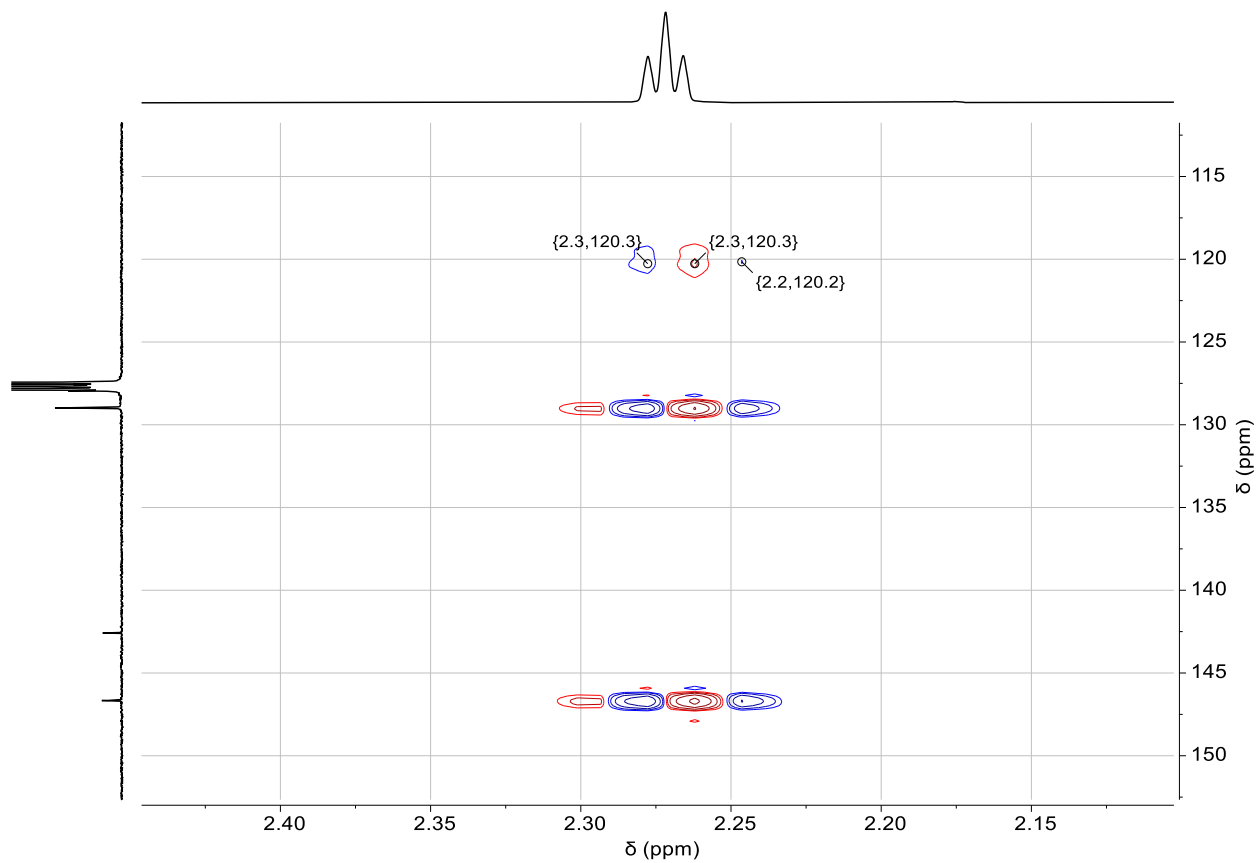

**Figure S12.**  $^1\text{H}$ - $^{13}\text{C}$  HMBC NMR spectrum of **3a**. Labelled peak correlates to the  $\text{C}_i$  atom.

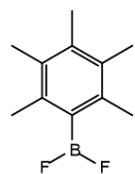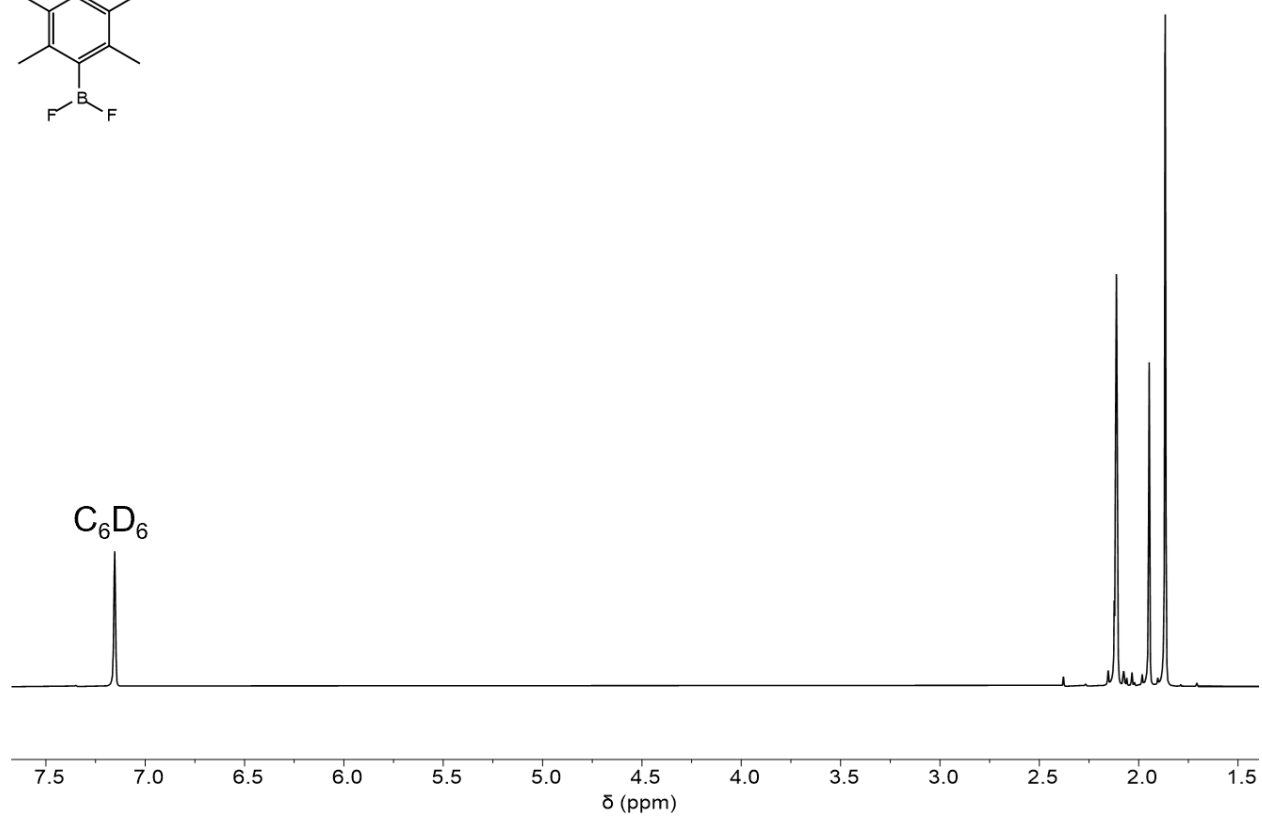

**Figure S13.**  $^1\text{H}$  NMR spectrum of **3b**.

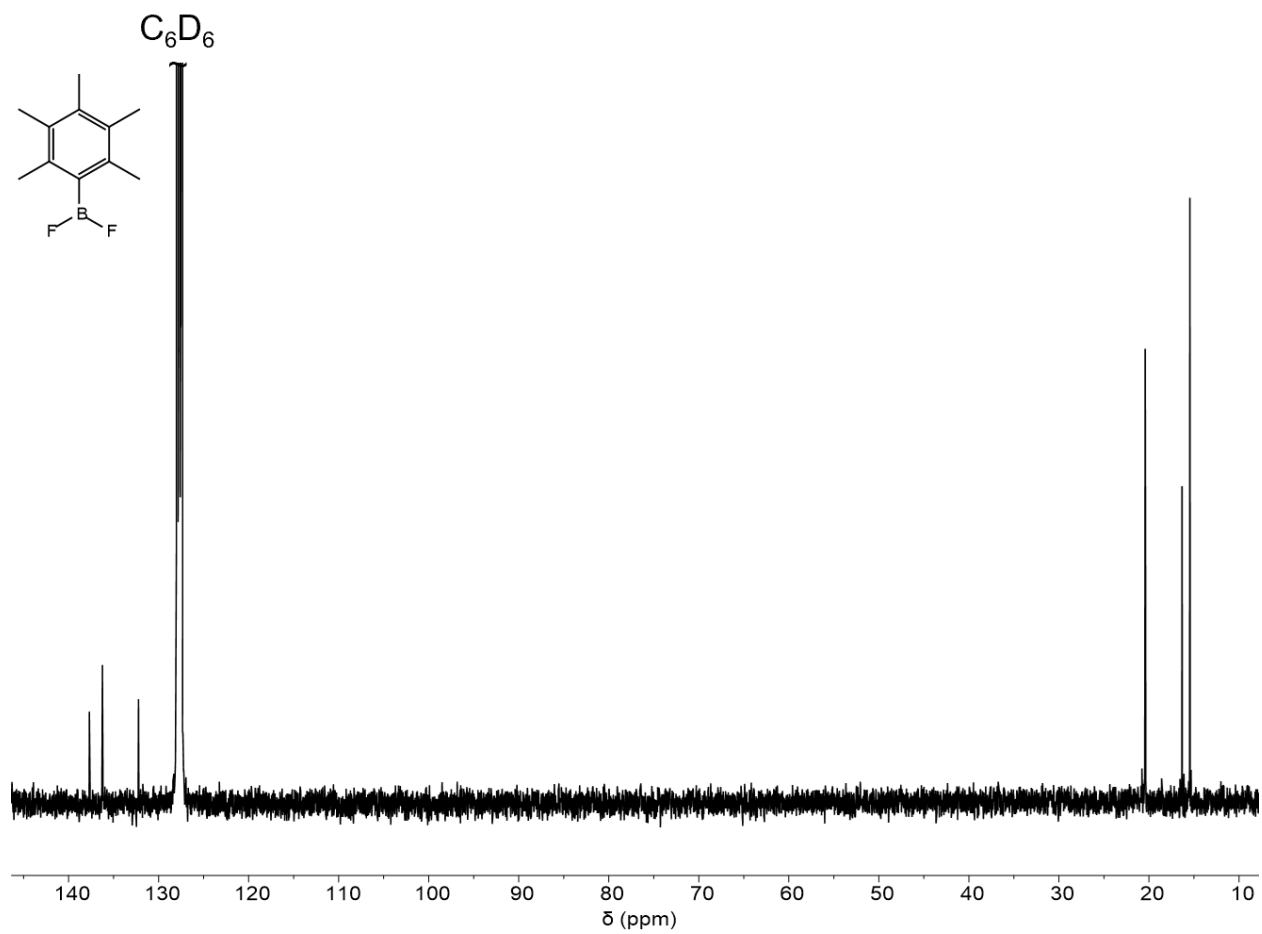

**Figure S14.**  $^{13}\text{C}$  NMR spectrum of **3b**.



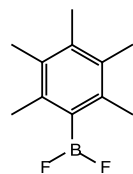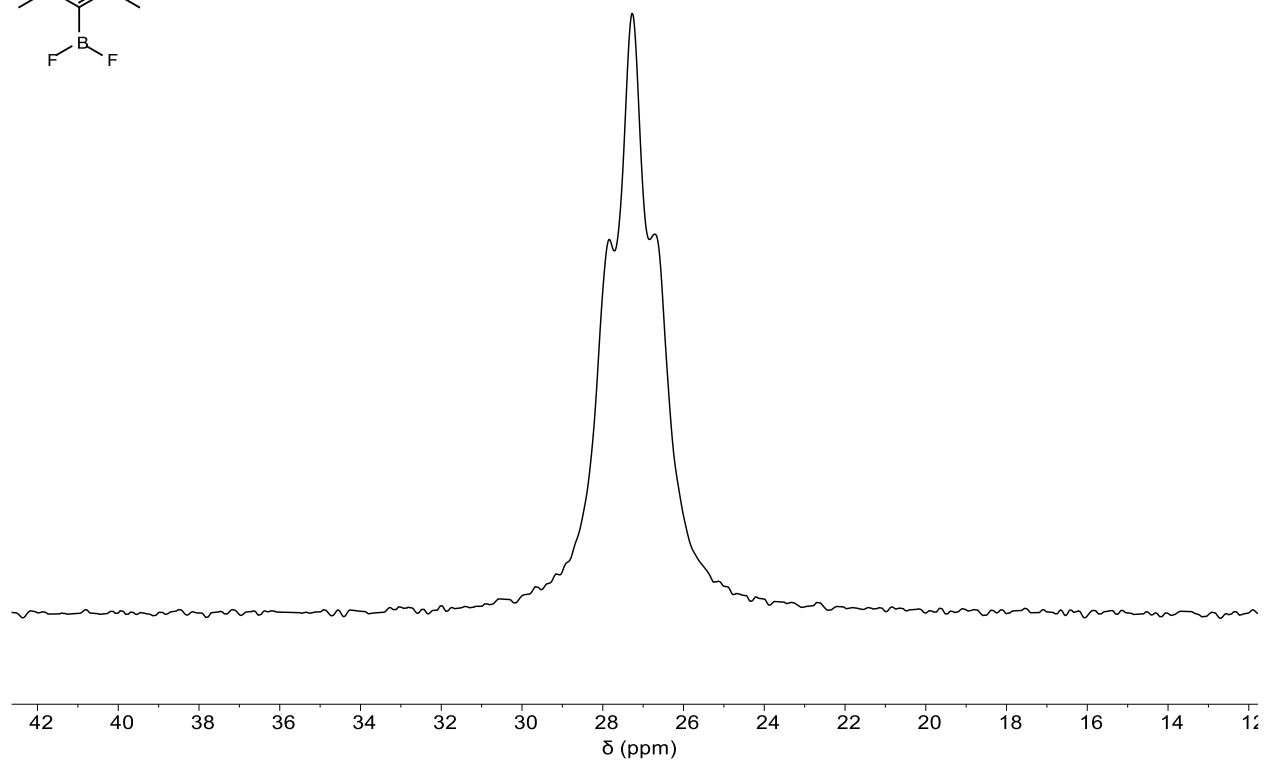

**Figure S15.**  $^{11}\text{B}$  NMR spectrum of **3b**.

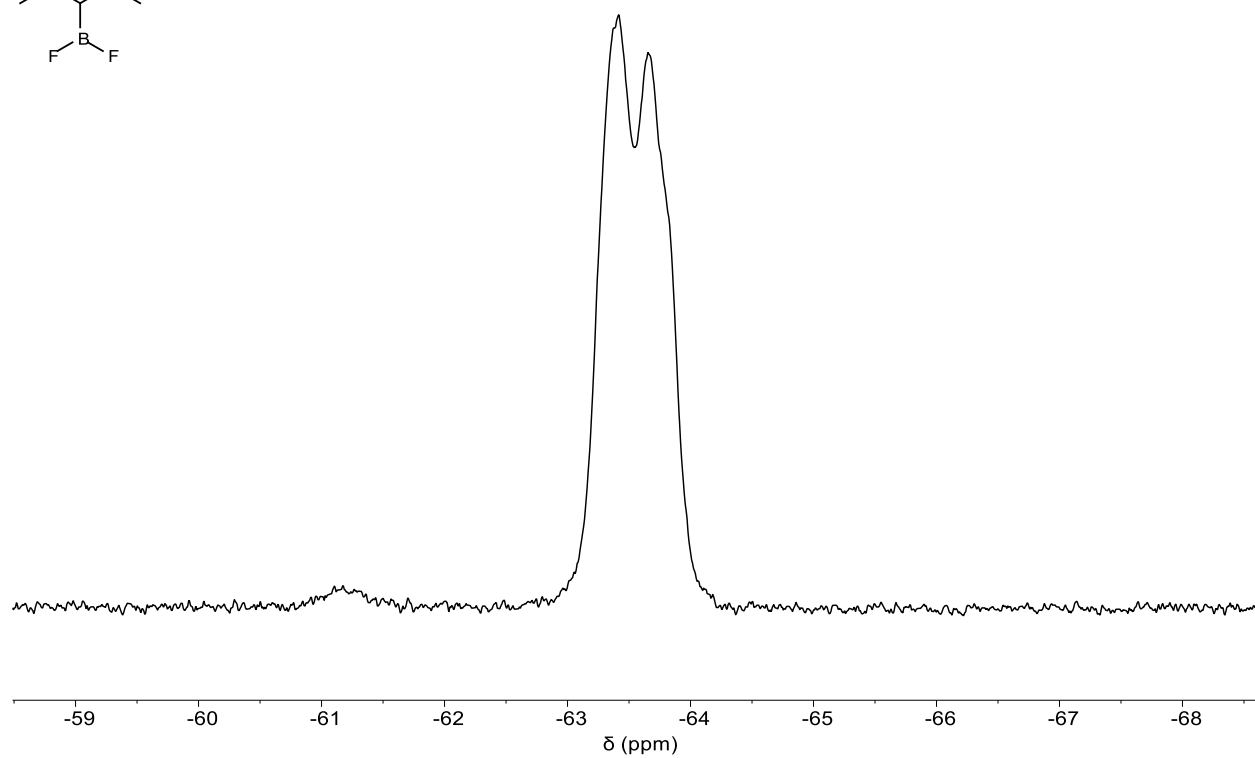

**Figure S16.**  $^{19}\text{F}$  NMR spectrum of **3b**.

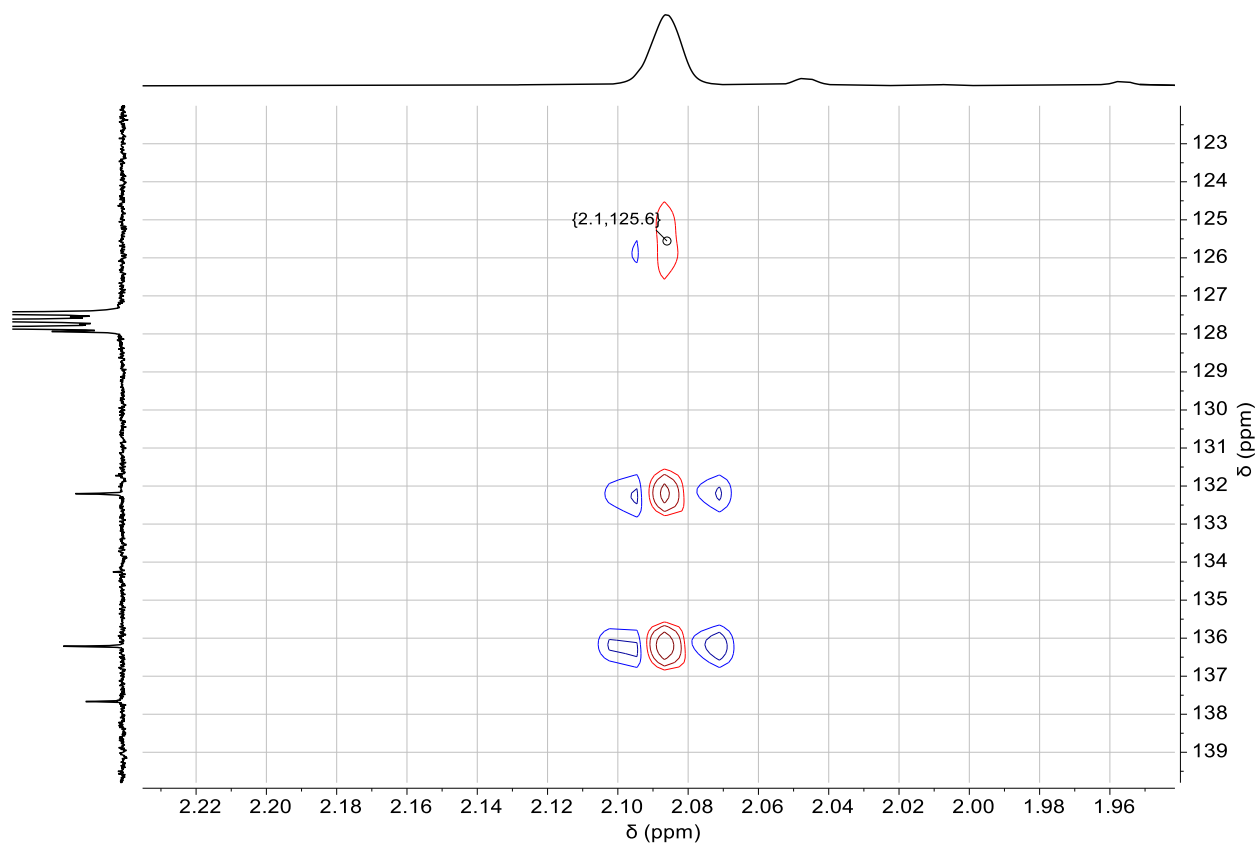

**Figure S17.**  $^1\text{H}$ - $^{13}\text{C}$  HMBC NMR spectrum of **3b**. Labelled peak correlates to the  $\text{C}_i$  atom.

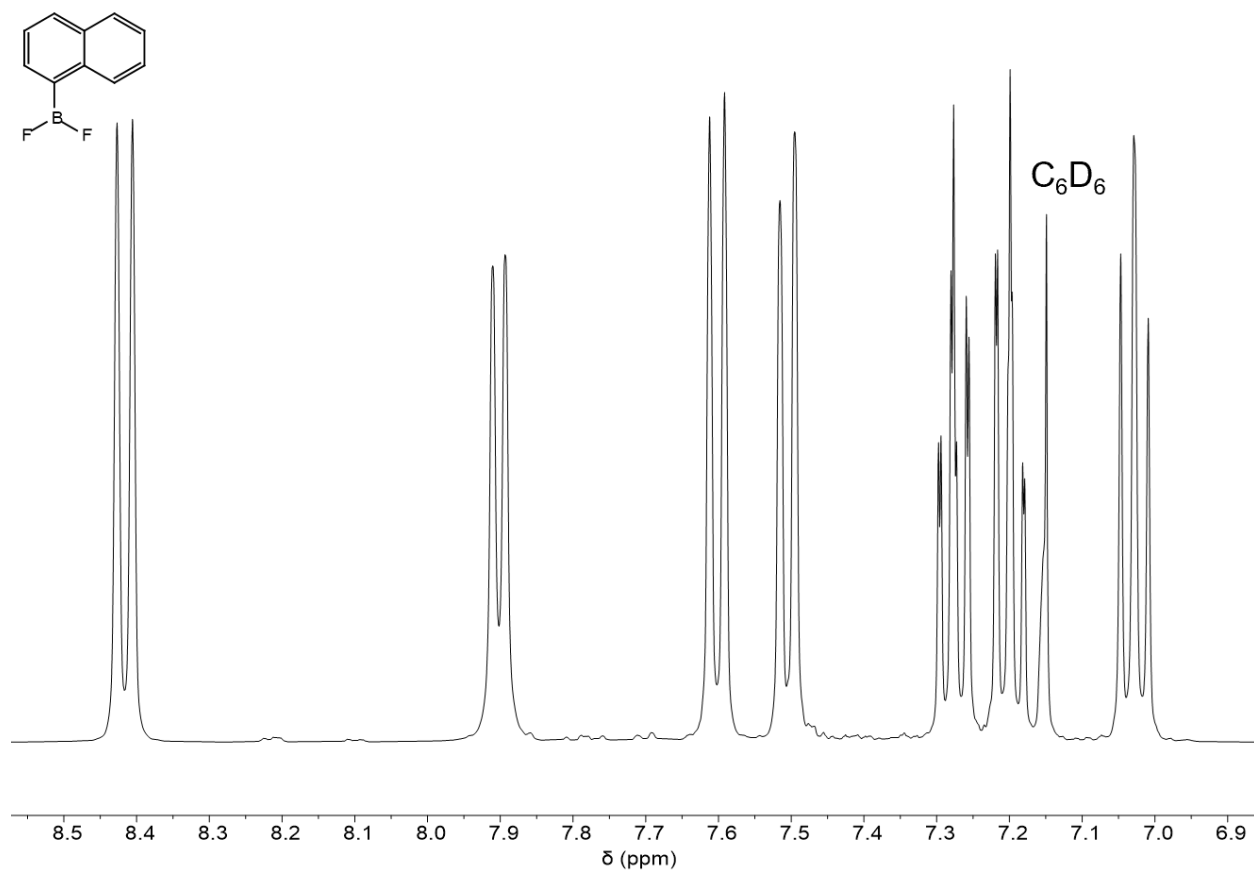

**Figure S18.**  $^1\text{H}$  NMR spectrum of **3c**.

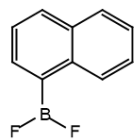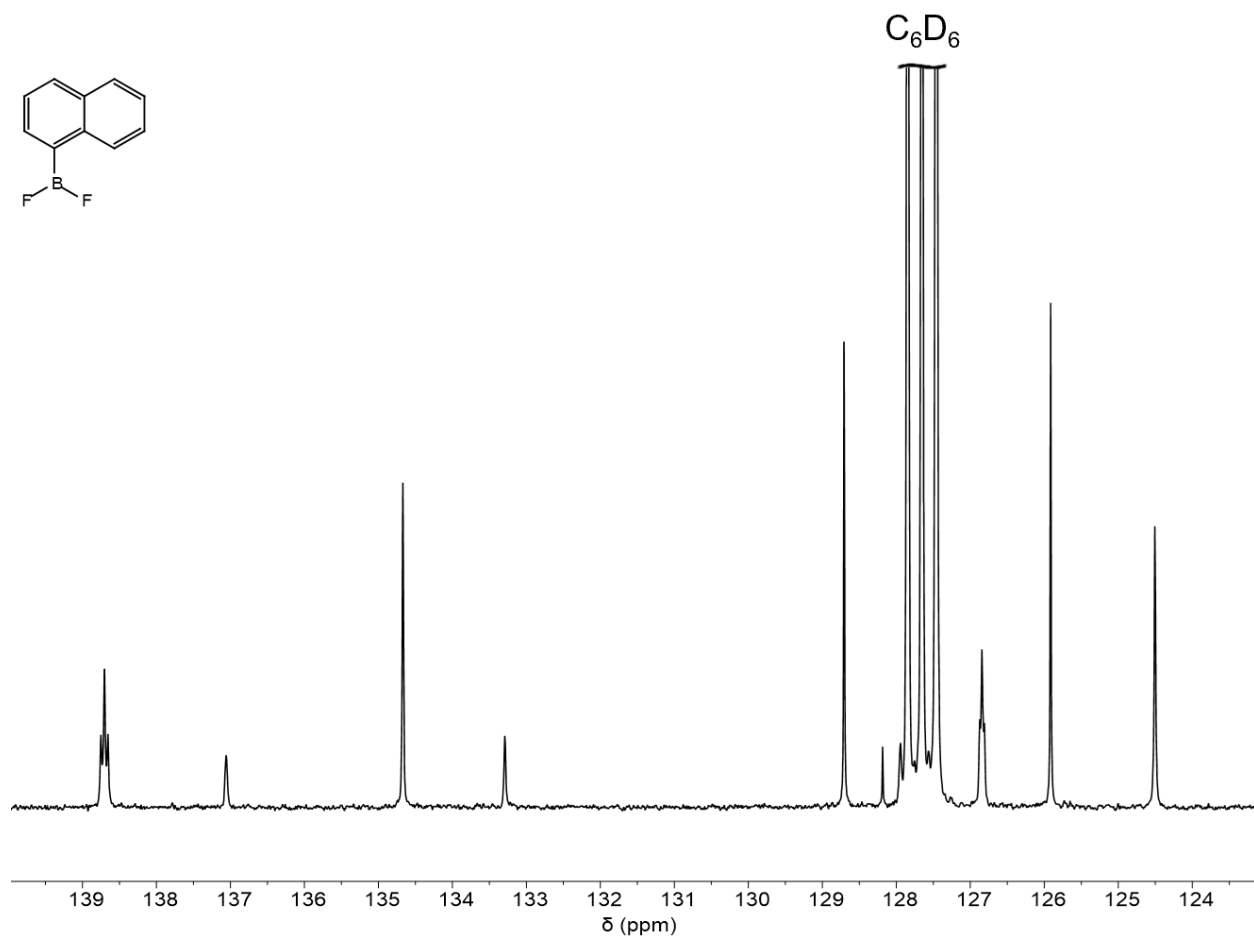

**Figure S19.**  $^{13}C$  NMR spectrum of **3c**.

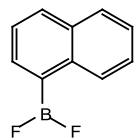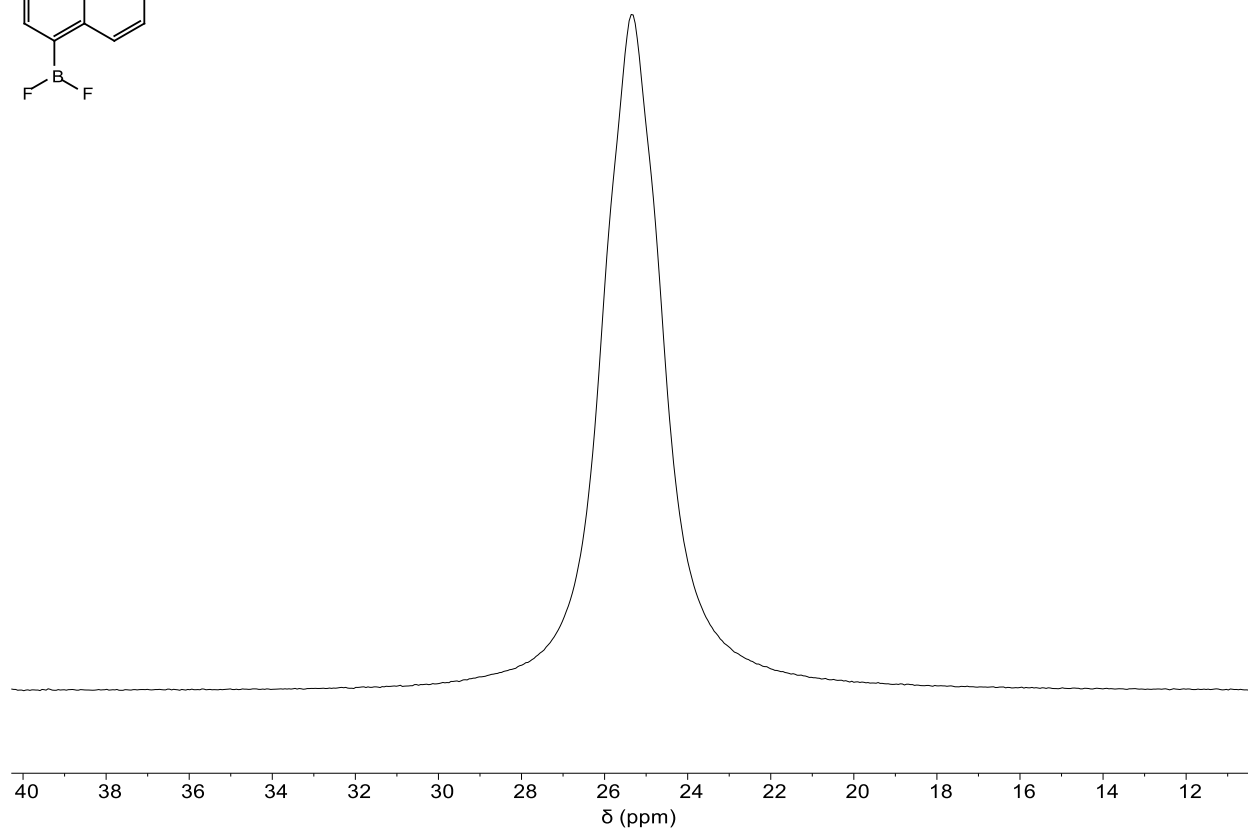

**Figure S20.**  $^{11}\text{B}$  NMR spectrum of **3c**.

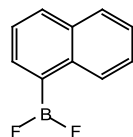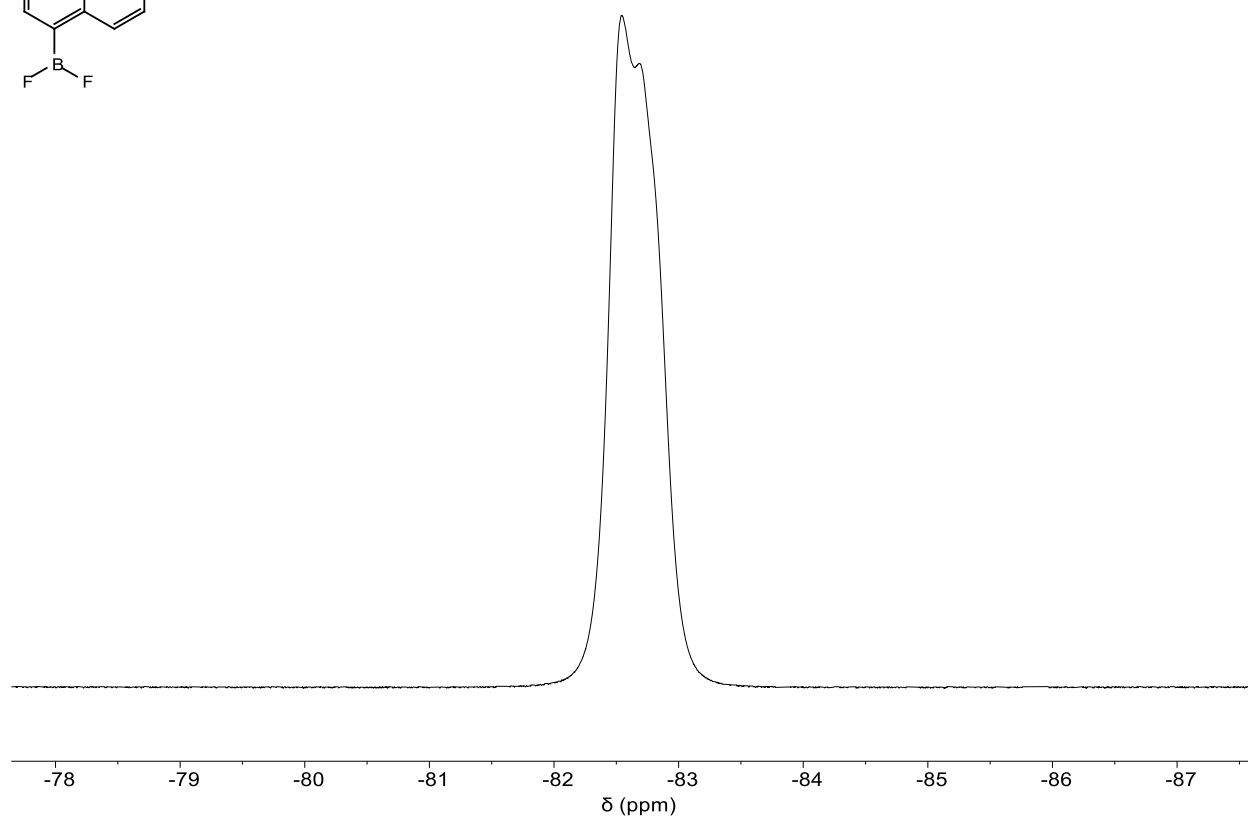

**Figure S21.**  $^{19}\text{F}$  NMR spectrum of **3c**.

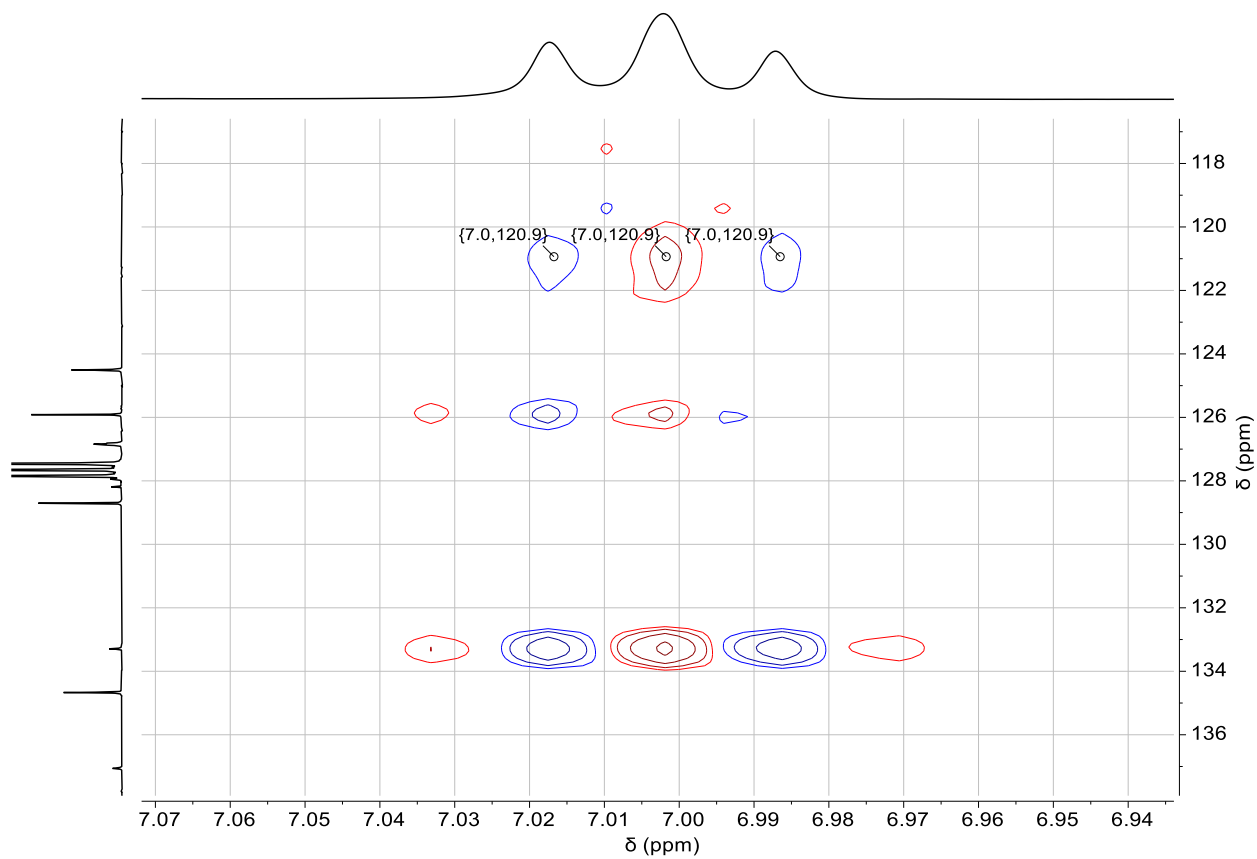

**Figure S22.**  $^1\text{H}$ - $^{13}\text{C}$  HMBC NMR spectrum of **3c**. Labelled peak correlates to C1.



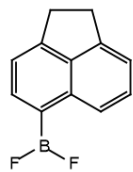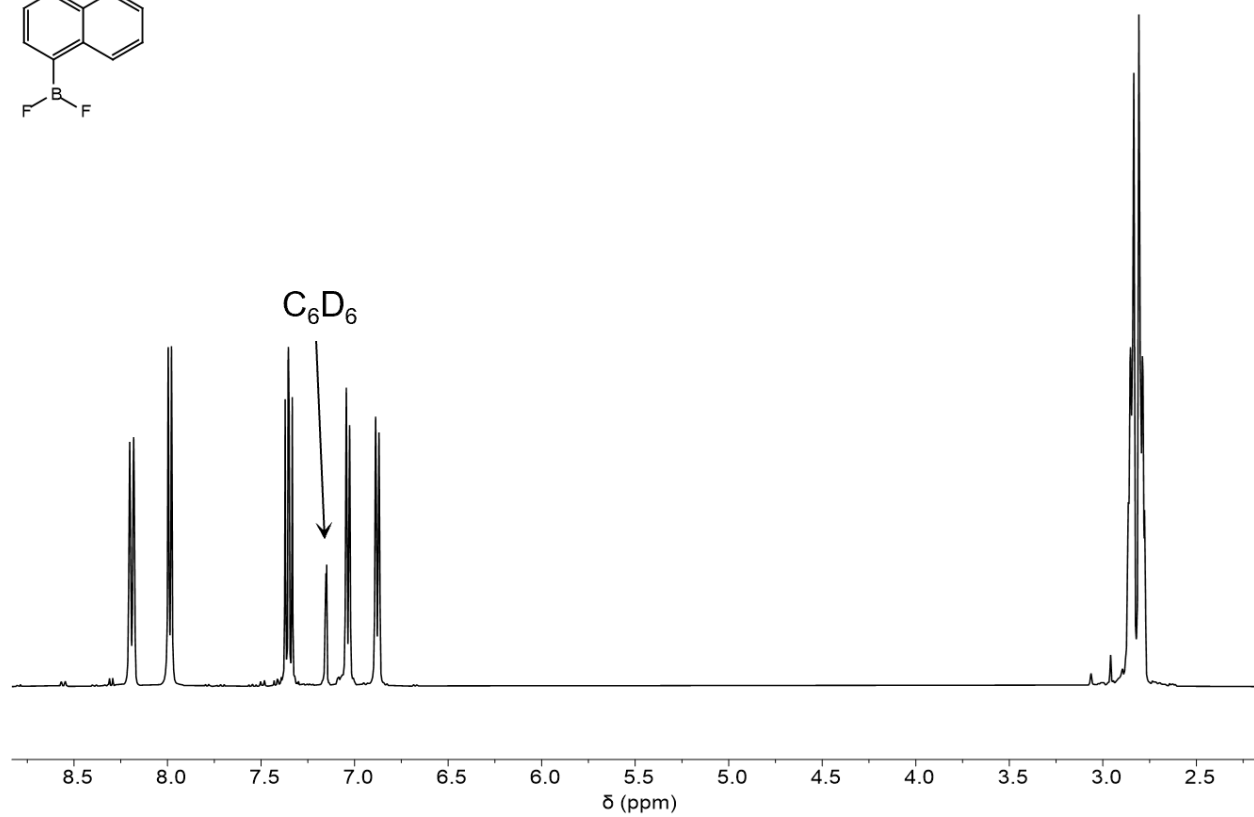

**Figure S23.**  $^1\text{H}$  NMR spectrum of **3d**.

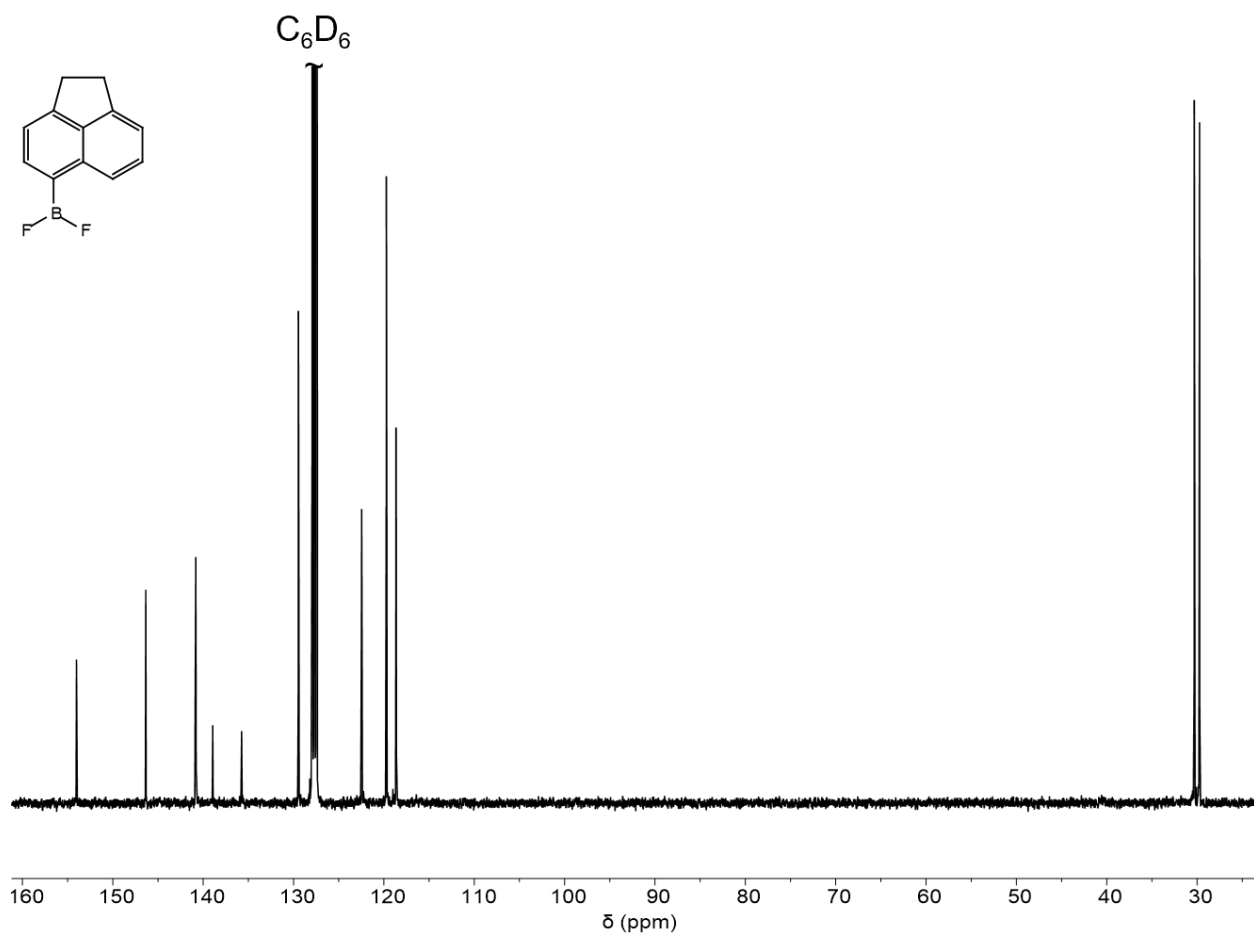

**Figure S24.**  $^{13}\text{C}$  NMR spectrum of **3d**.

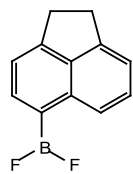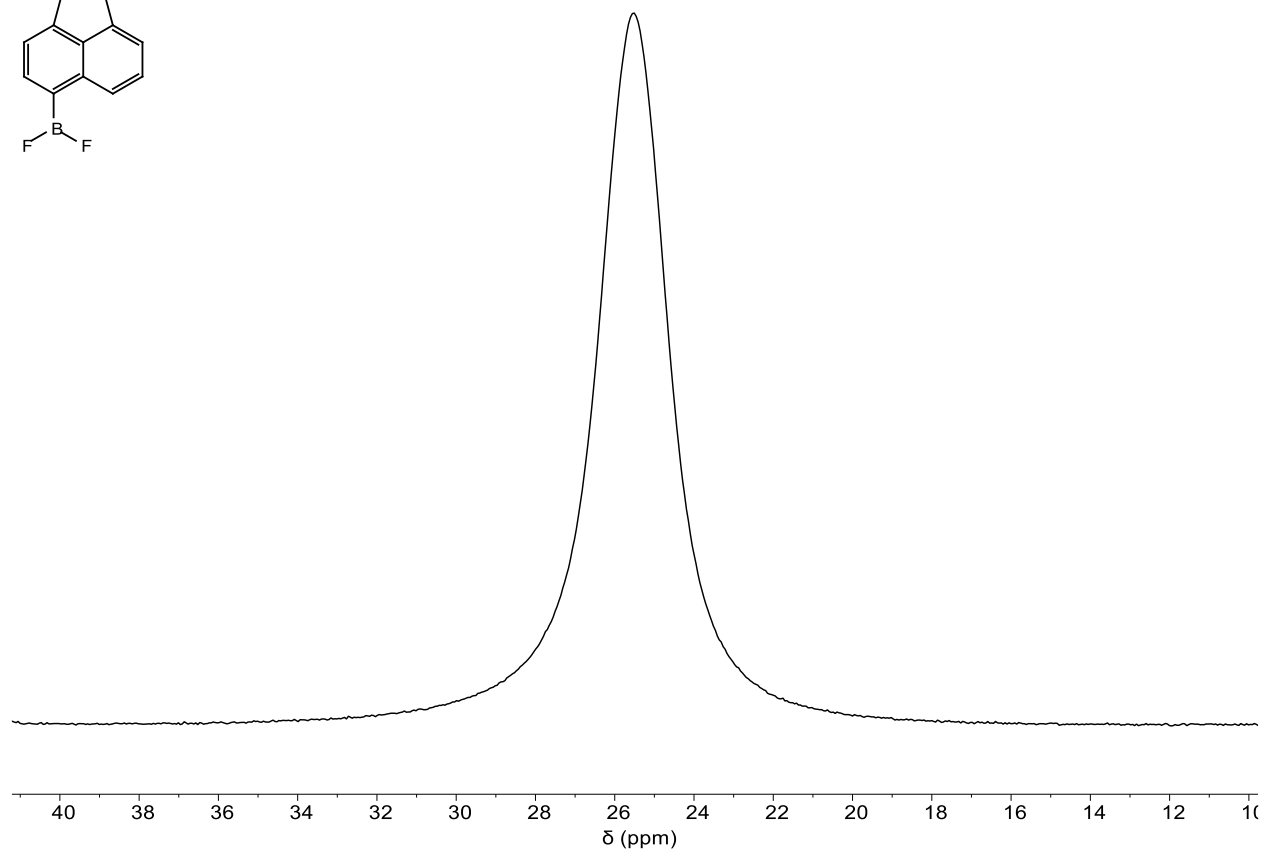

**Figure S25.**  $^{11}\text{B}$  NMR spectrum of **3d**.

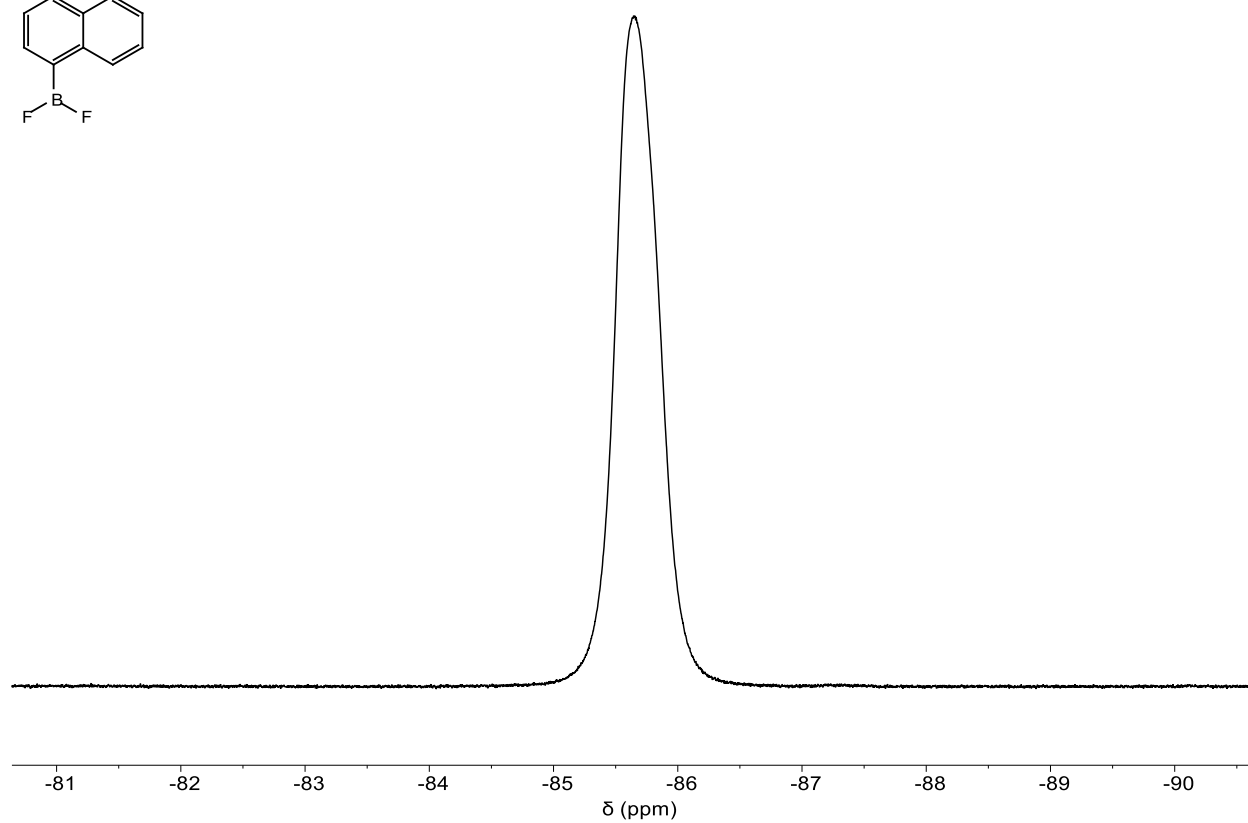

**Figure S26.**  $^{19}\text{F}$  NMR spectrum of **3d**.

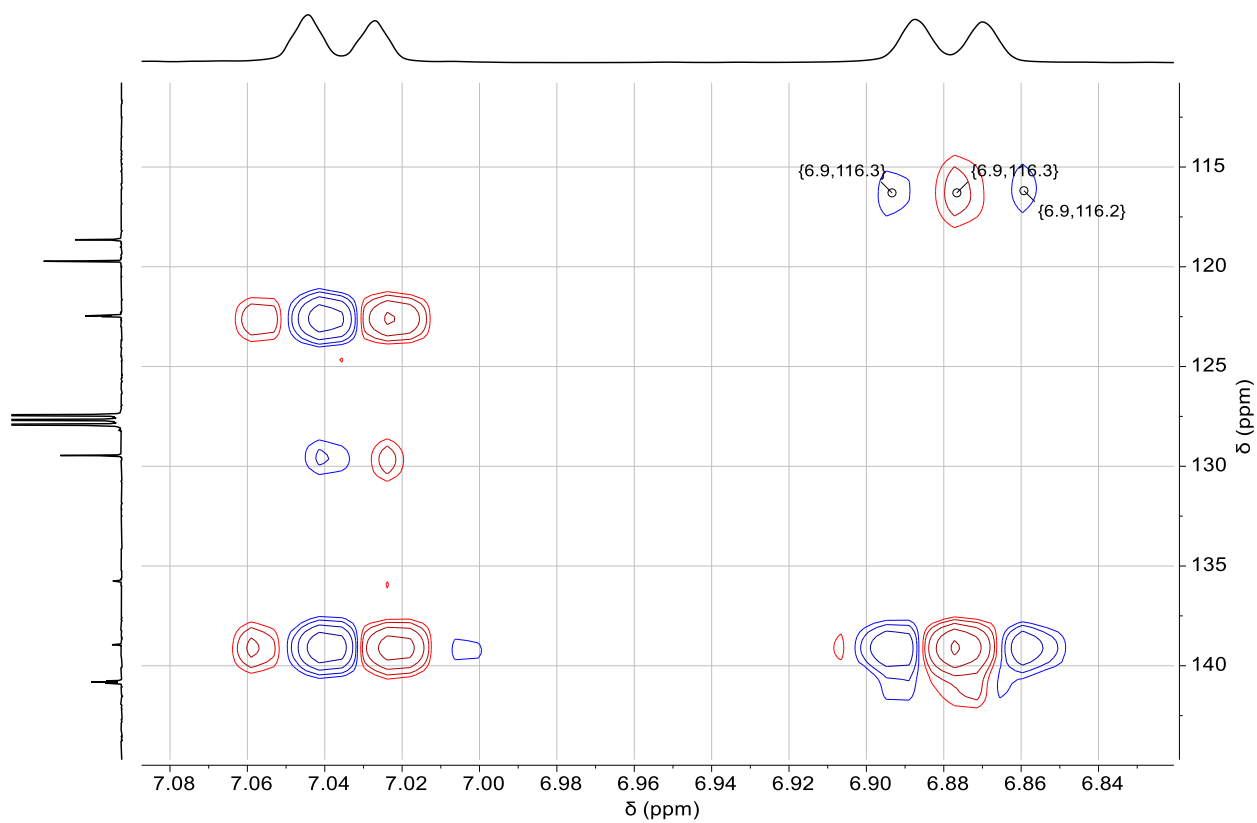

**Figure S27.**  $^1\text{H}$ - $^{13}\text{C}$  HMBC NMR spectrum of **3d**. Labelled peak correlates to C5.

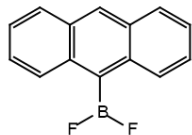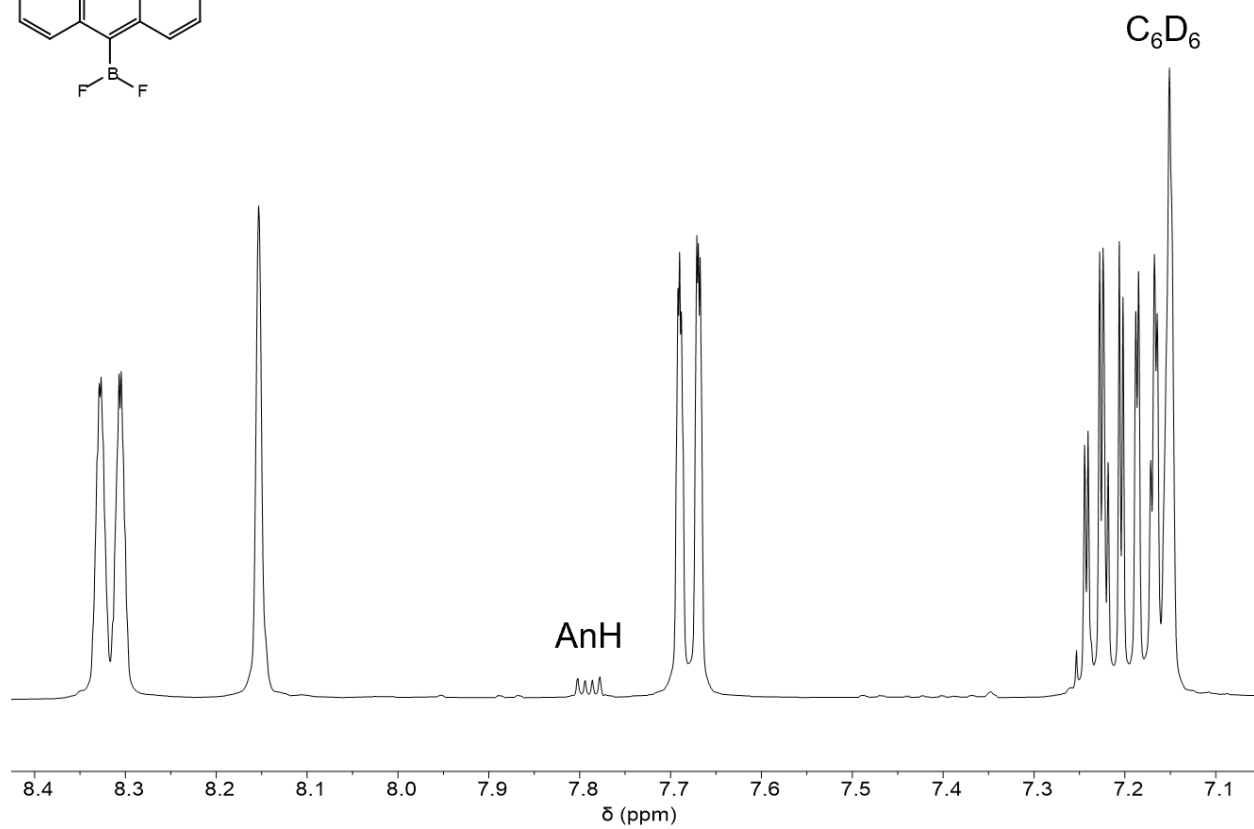

**Figure S28.**  $^1\text{H}$  NMR spectrum of **3e**.

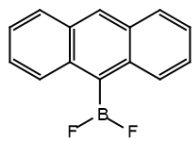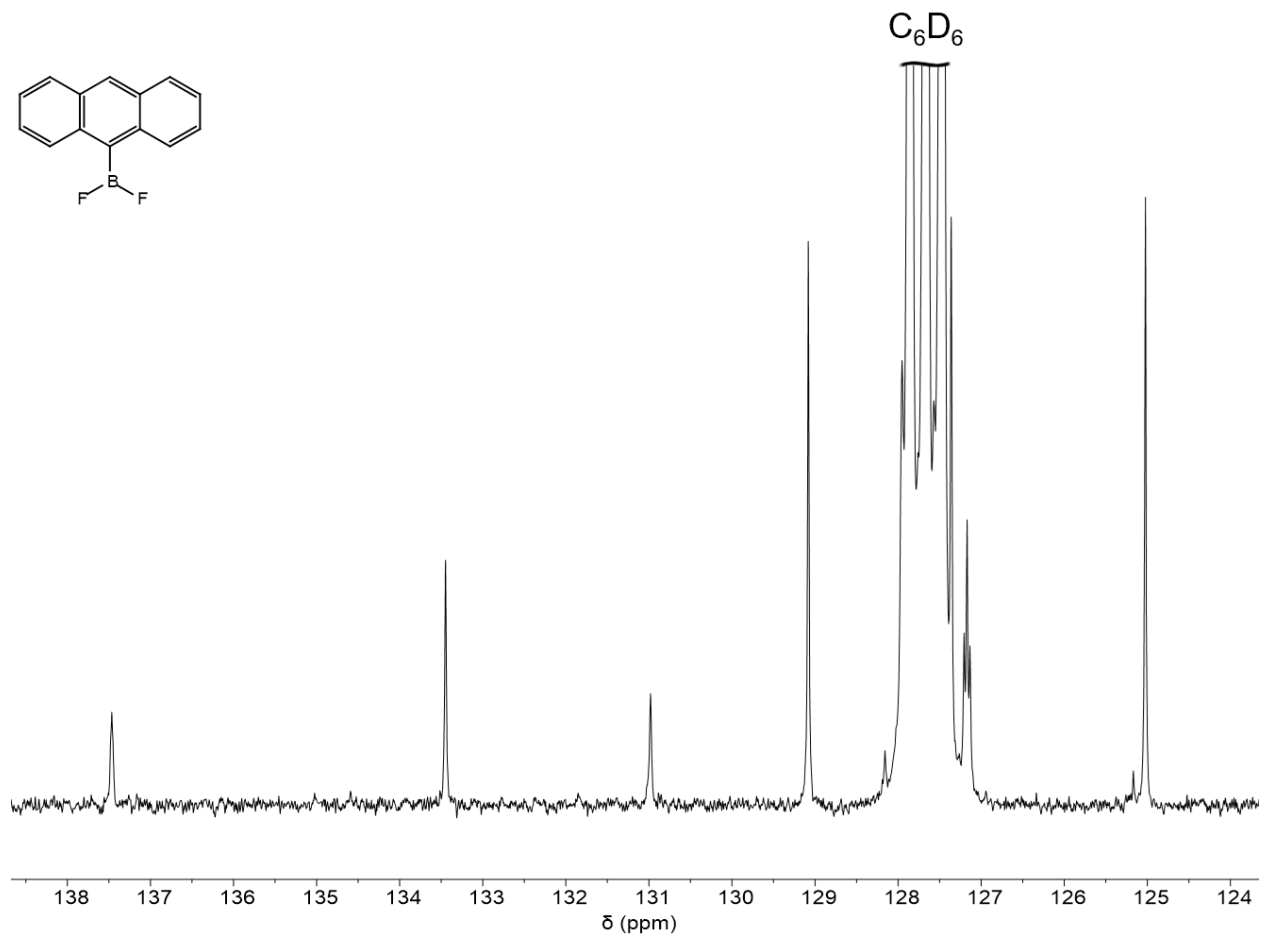

**Figure S29.**  $^{13}\text{C}$  NMR spectrum of 3e.

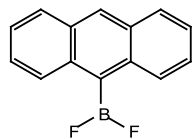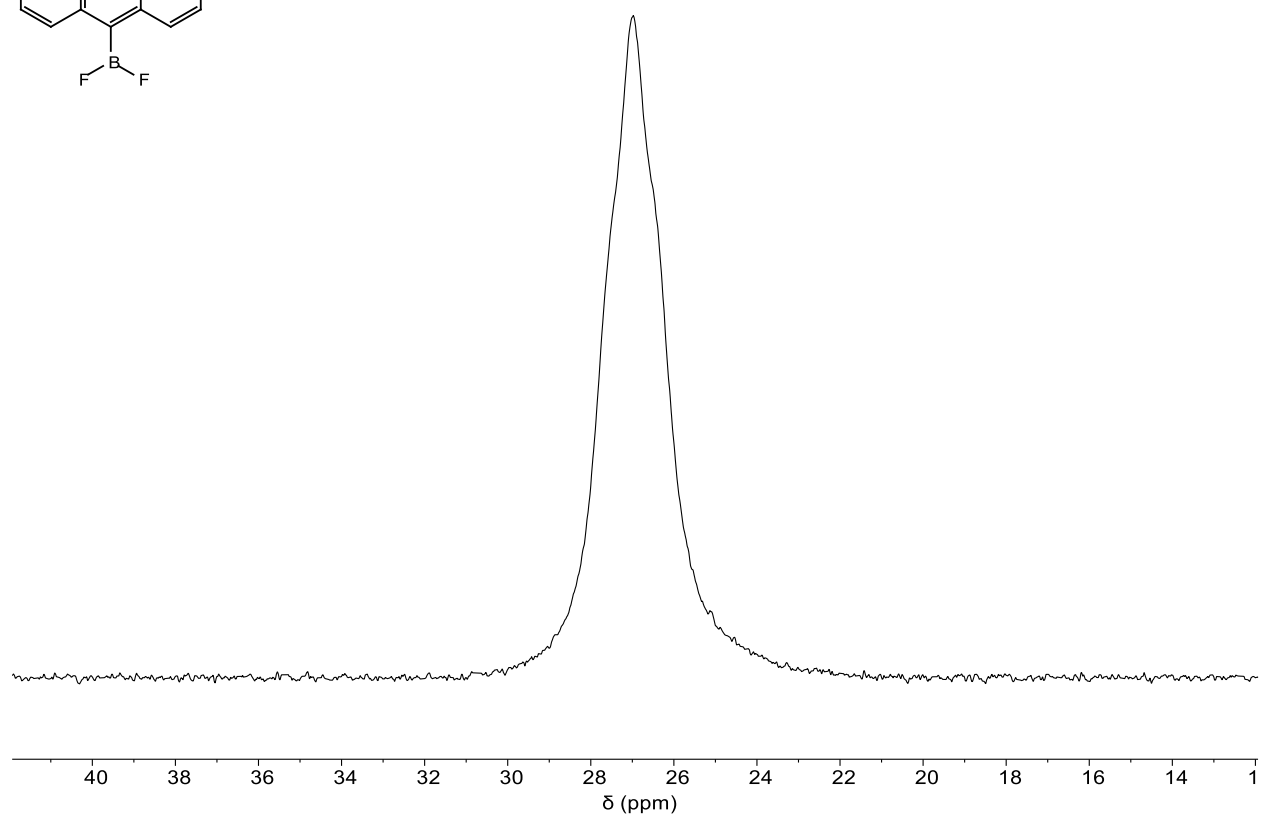

**Figure S30.**  $^{11}\text{B}$  NMR spectrum of **3e**.



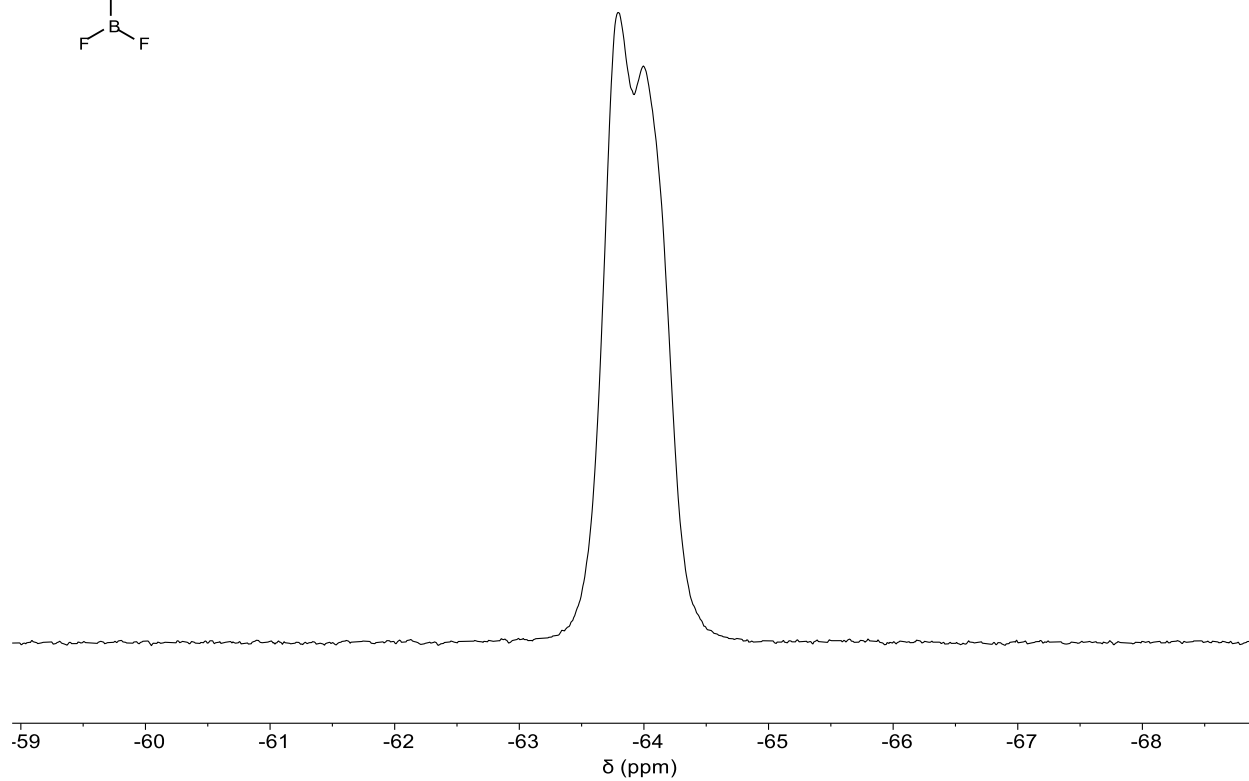

**Figure S31.**  $^{19}\text{F}$  NMR spectrum of **3e**.

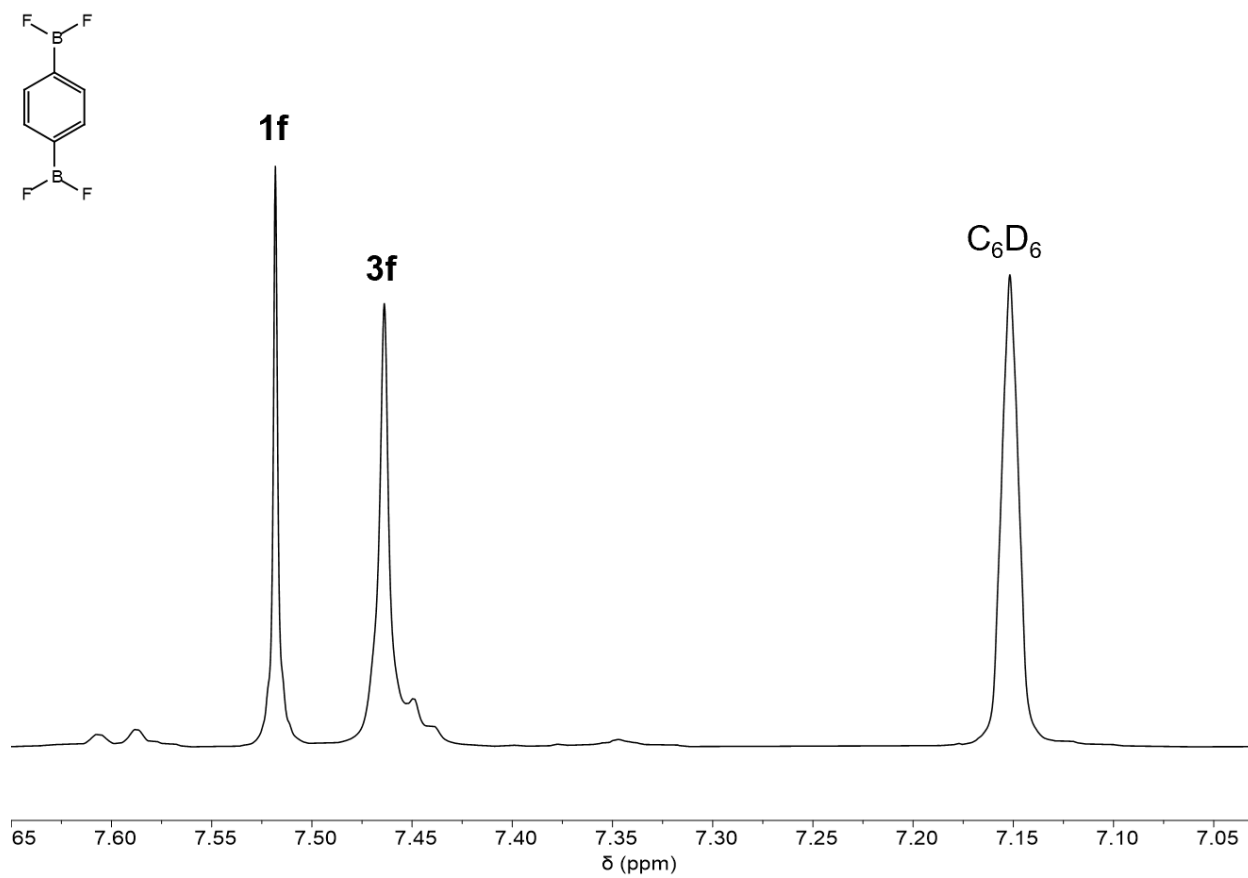

**Figure S32.**  $^1\text{H}$  NMR spectrum of **3f**.

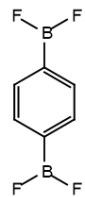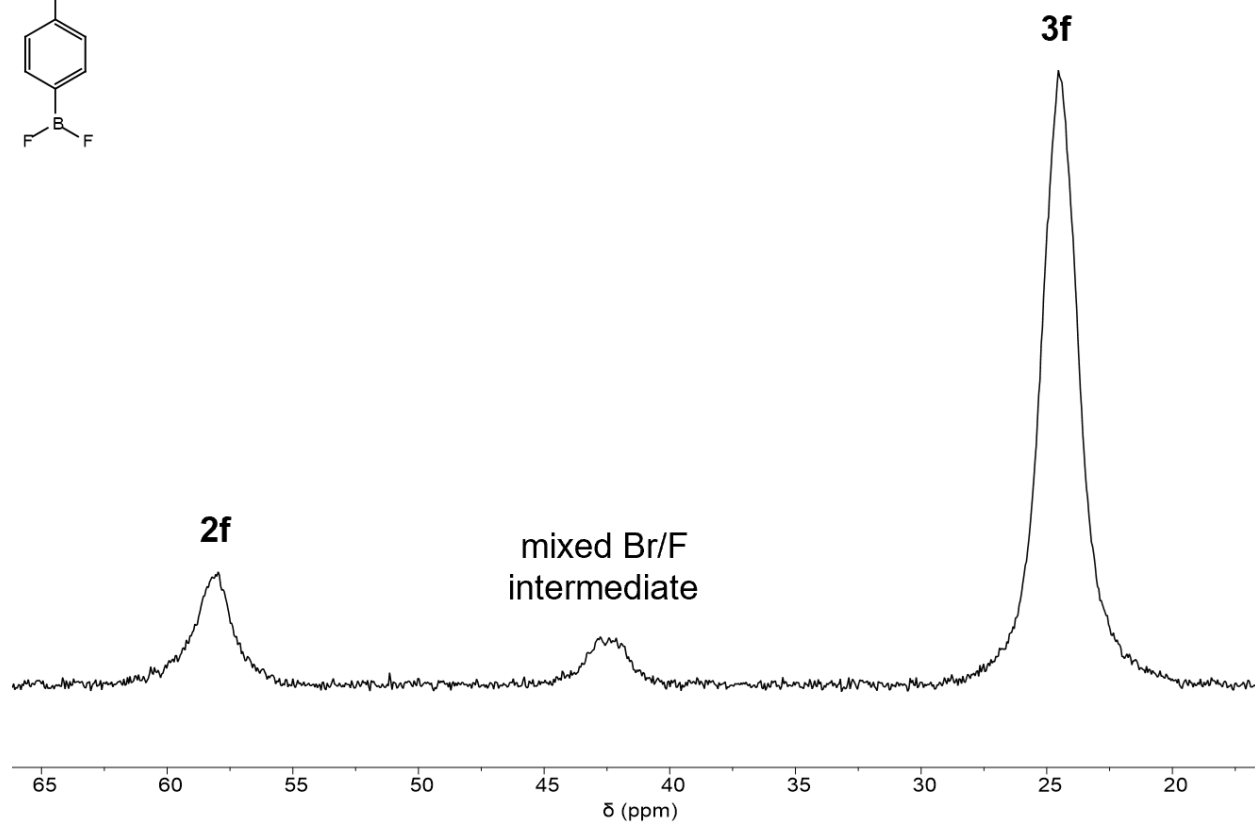

**Figure S33.**  $^{11}\text{B}$  NMR spectrum of **3f**.

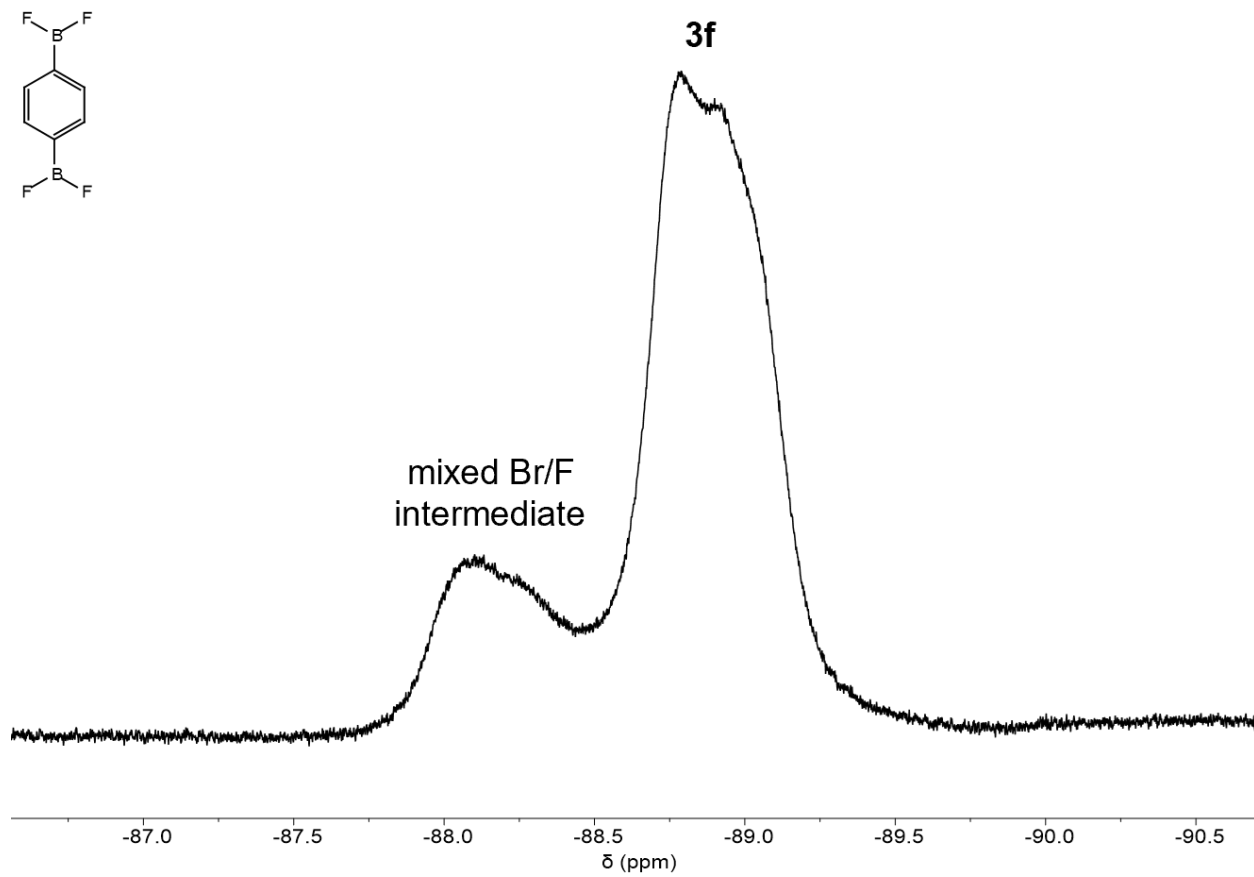

**Figure S34.**  $^{19}\text{F}$  NMR spectrum of **3f**.

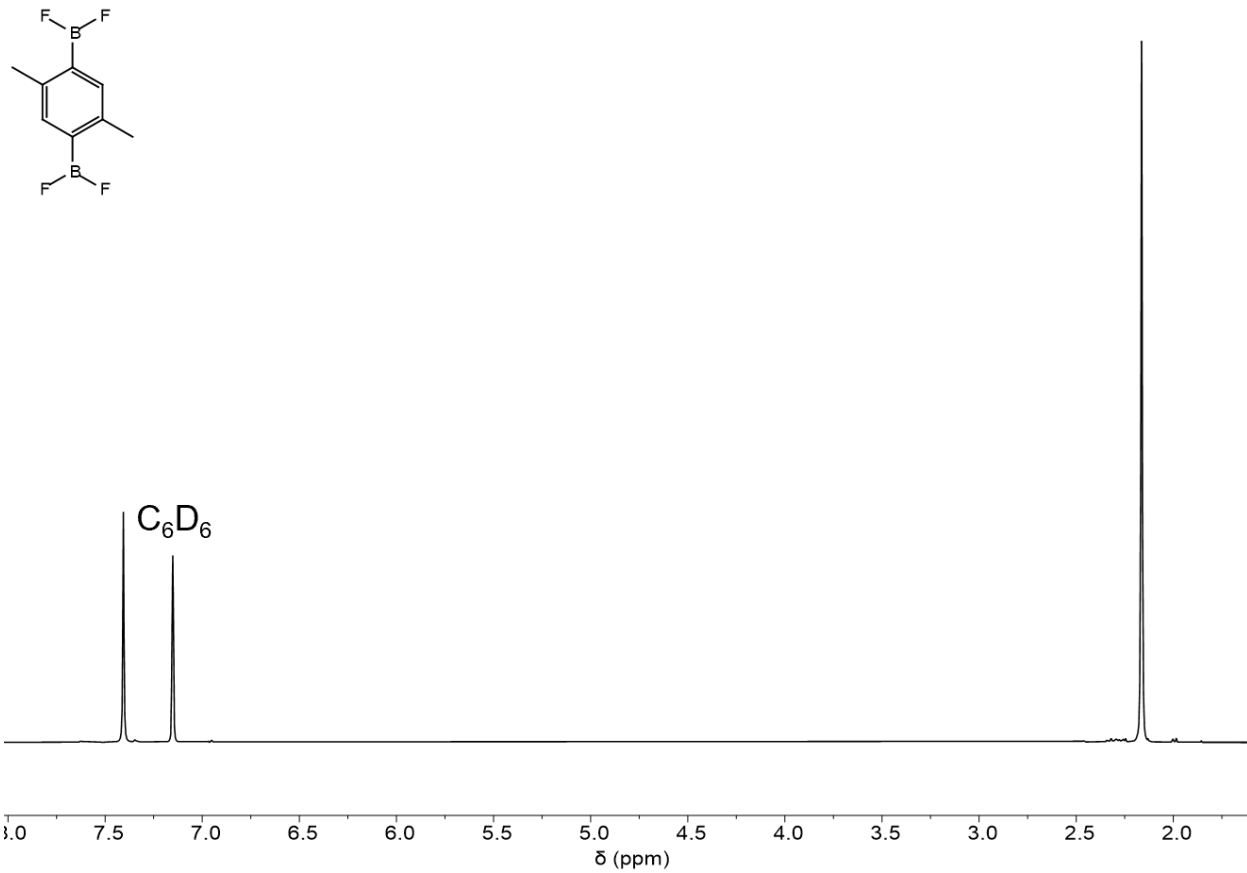

**Figure S35.**  $^1\text{H}$  NMR spectrum of **3g**.

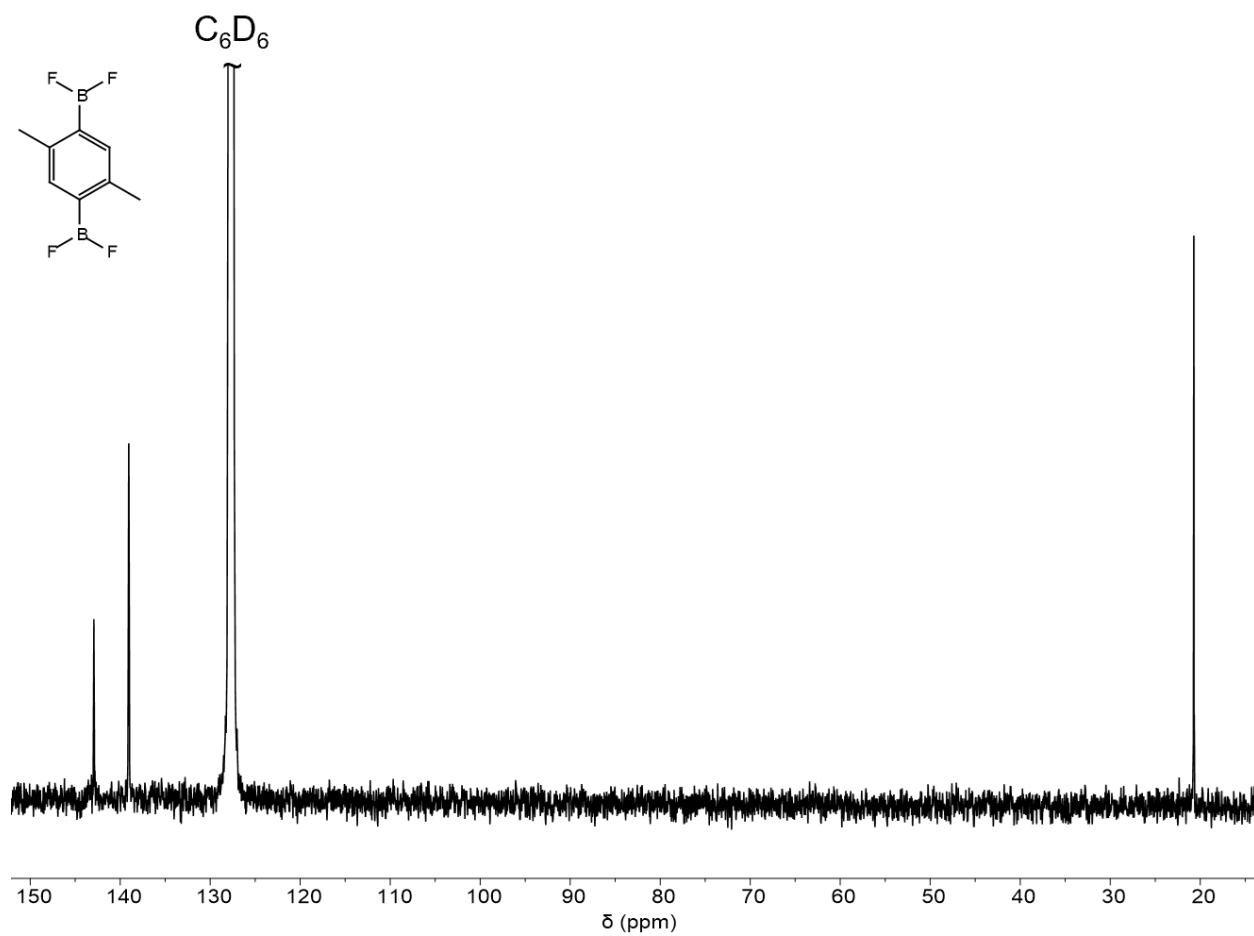

**Figure S36.**  $^{13}\text{C}$  NMR spectrum of **3g**.

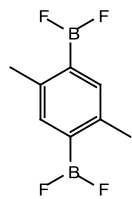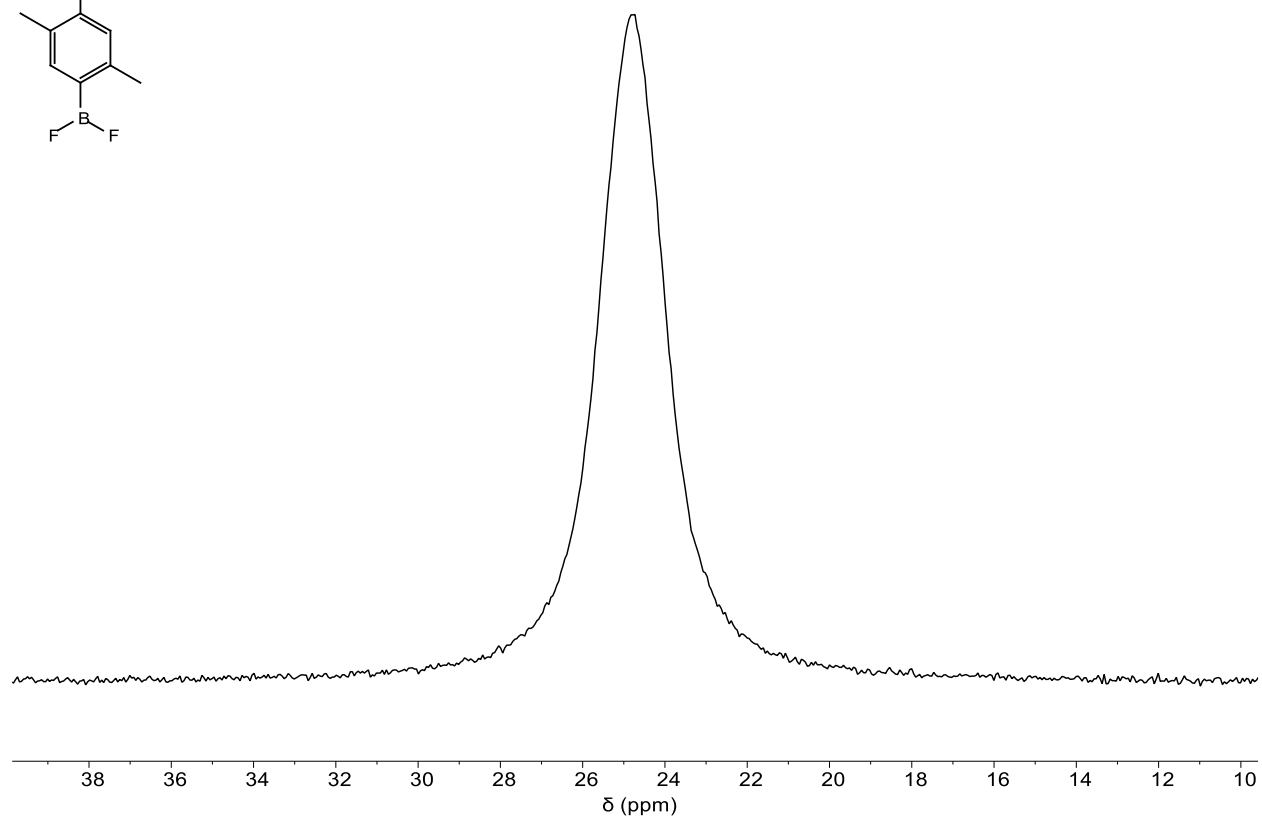

**Figure S37.** <sup>11</sup>B NMR spectrum of **3g**.

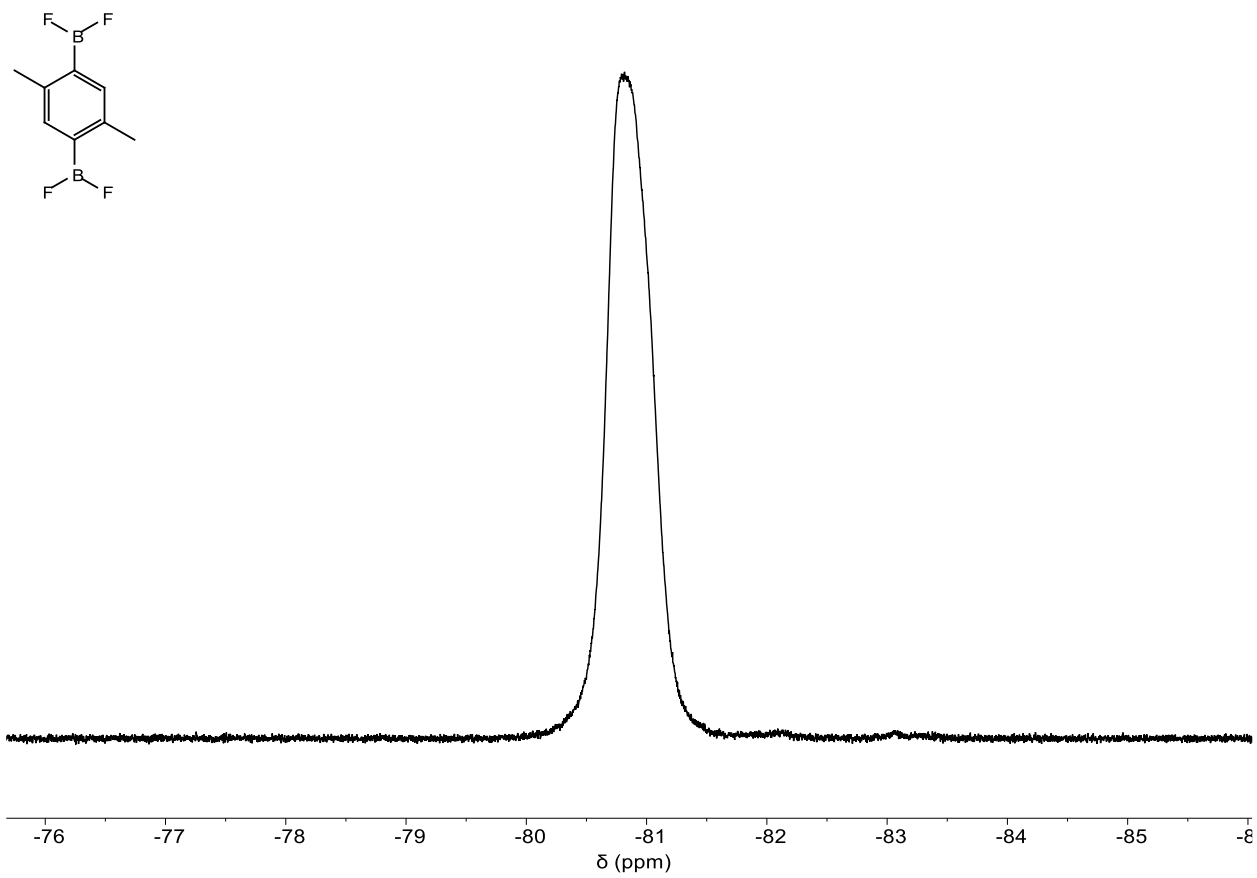

**Figure S38.**  $^{19}\text{F}$  NMR spectrum of **3g**.



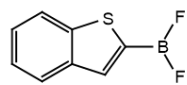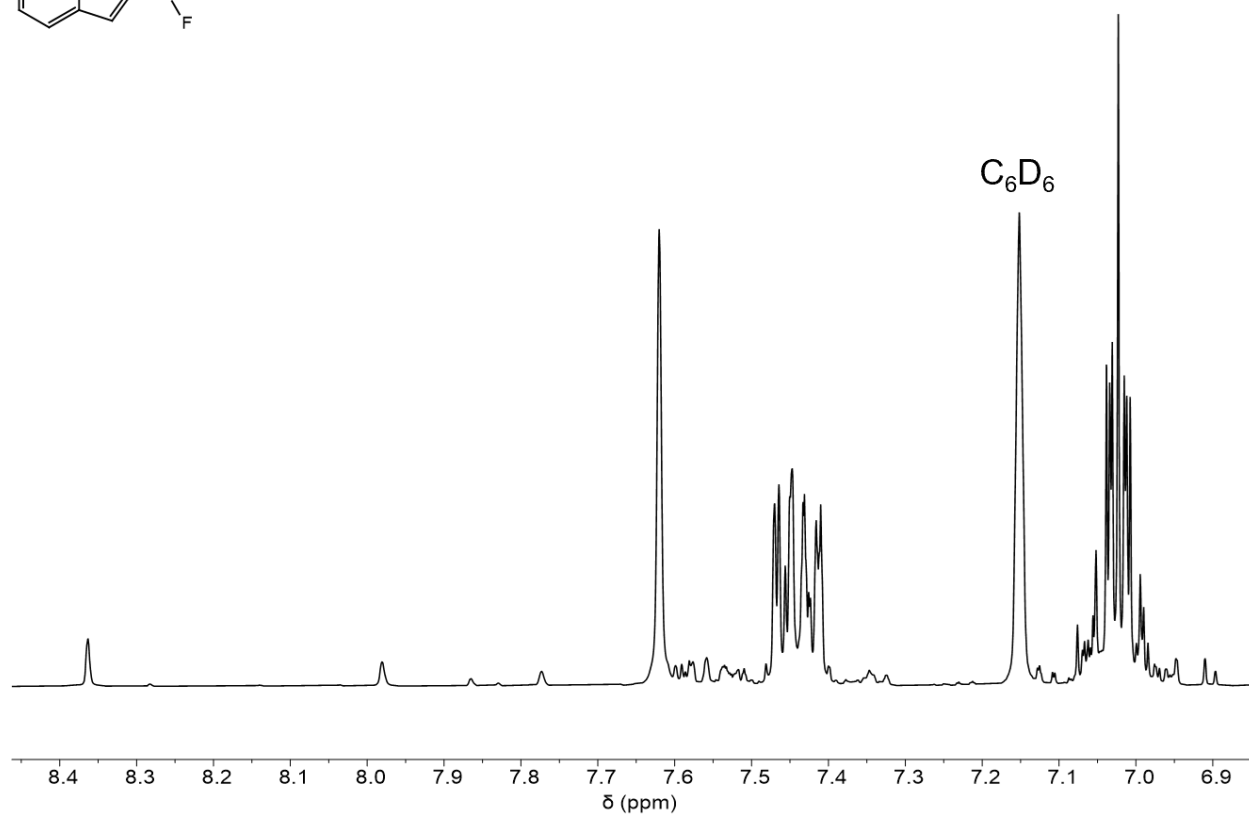

**Figure S39.**  $^1\text{H}$  NMR spectrum of **3h**.

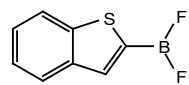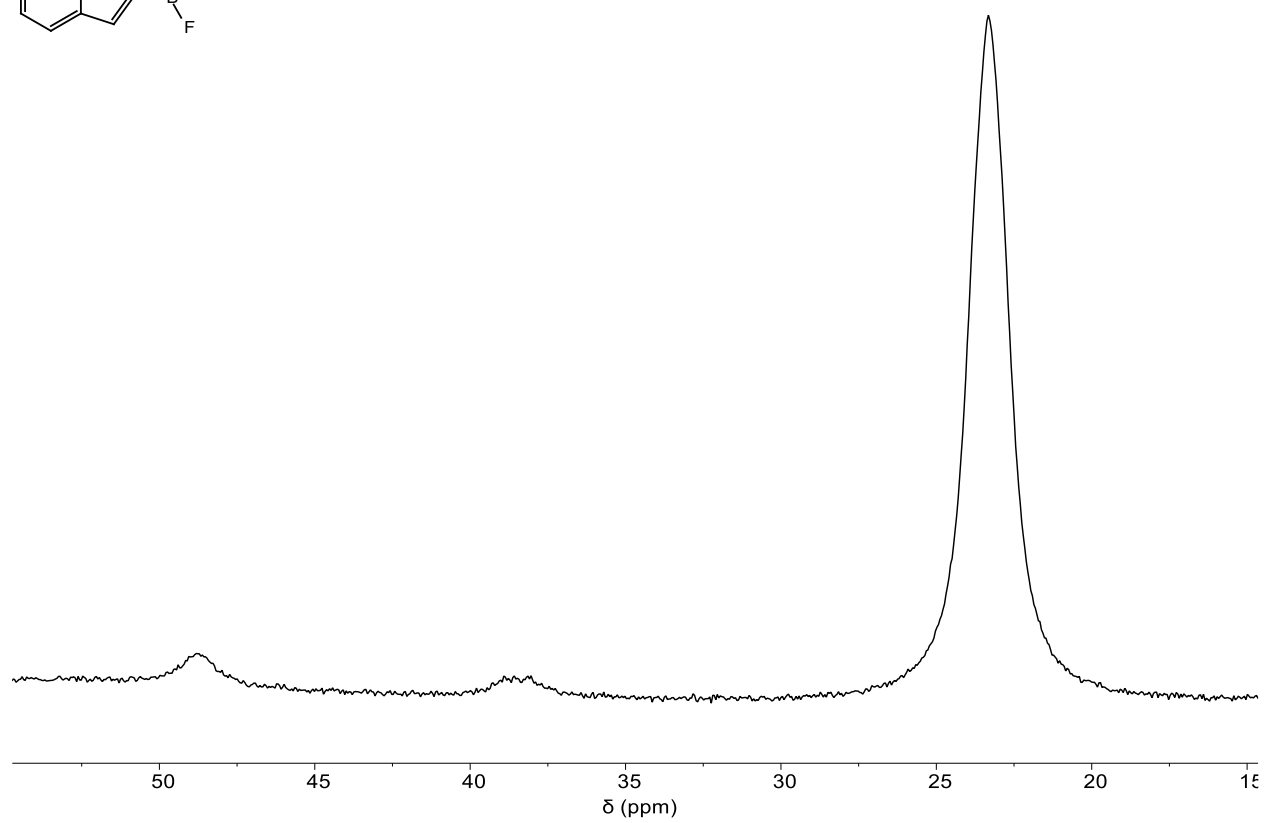

**Figure S40.**  $^{11}\text{B}$  NMR spectrum of **3h**.

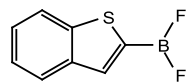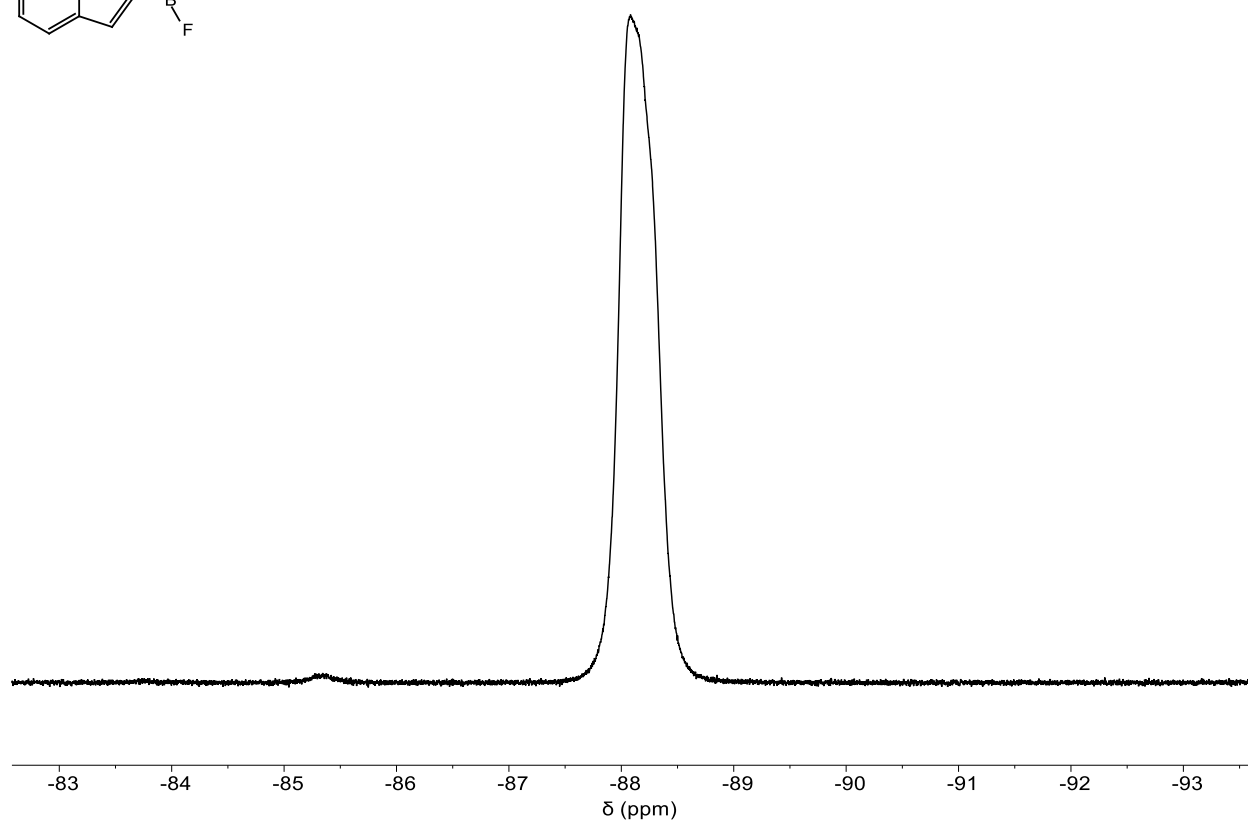

**Figure S41.**  $^{19}\text{F}$  NMR spectrum of **3h**.

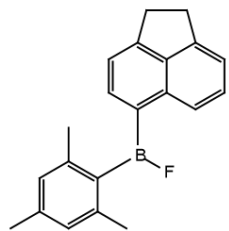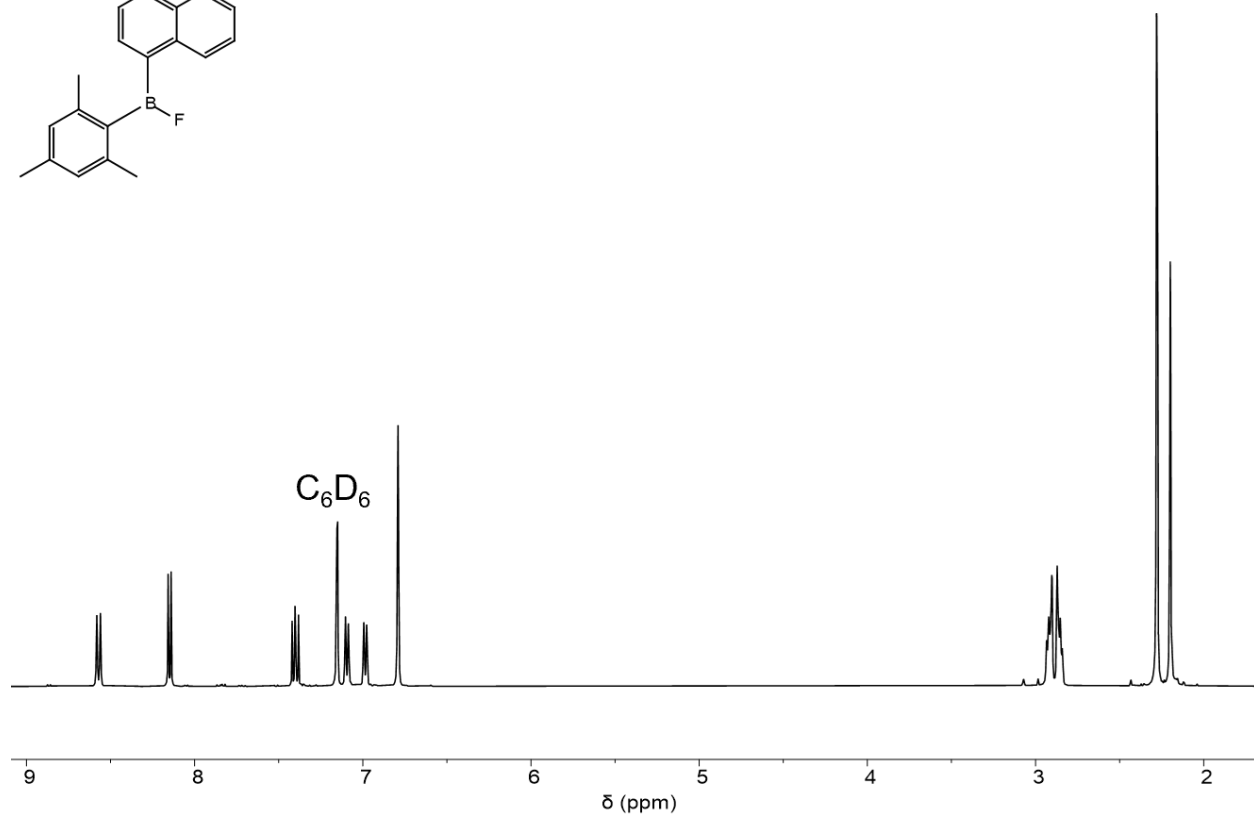

**Figure S42.** <sup>1</sup>H NMR spectrum of **4a**.

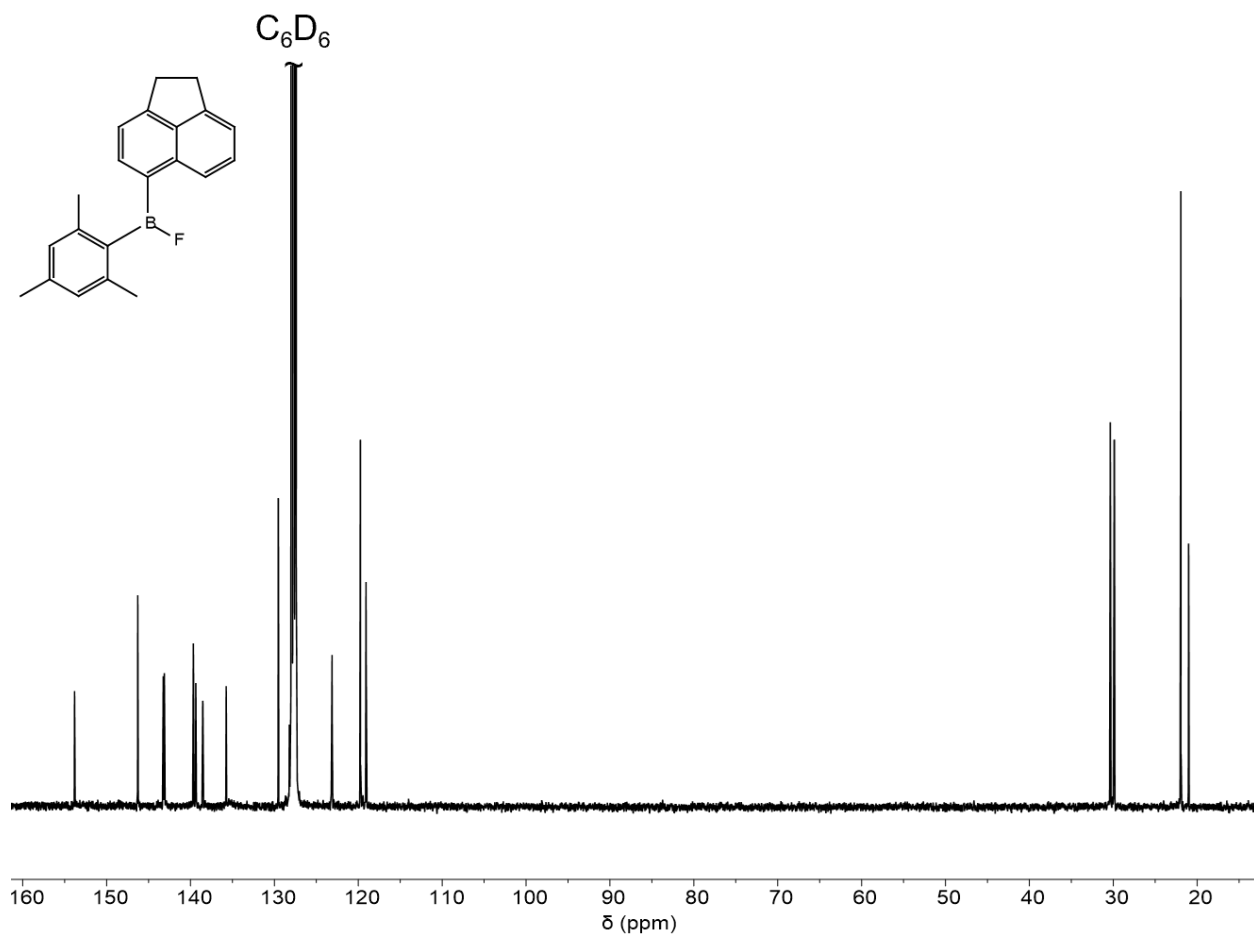

**Figure S43.**  $^{13}\text{C}$  NMR spectrum of **4a**.

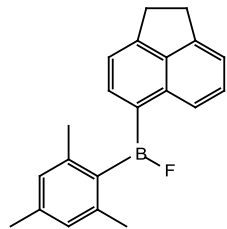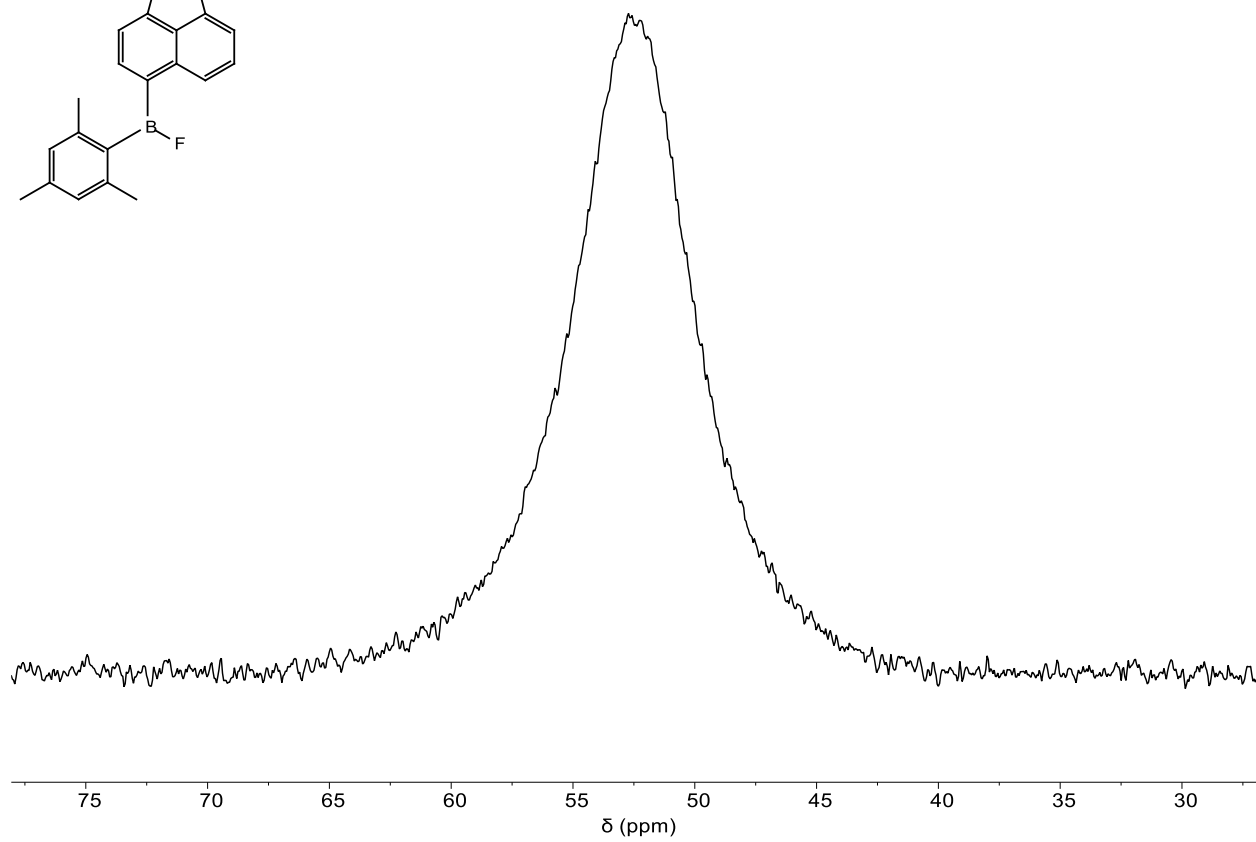

**Figure S44.**  $^{11}\text{B}$  NMR spectrum of **4a**.

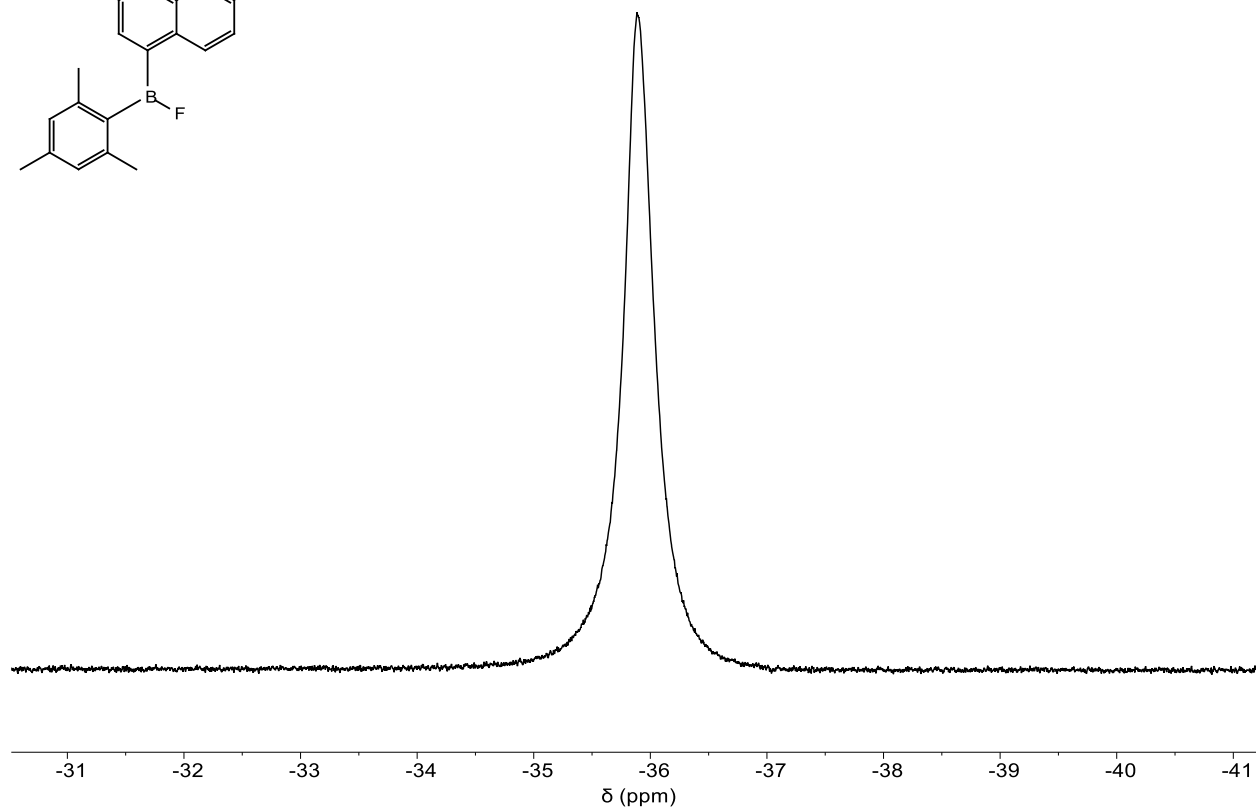

**Figure S45.**  $^{19}\text{F}$  NMR spectrum of **4a**.

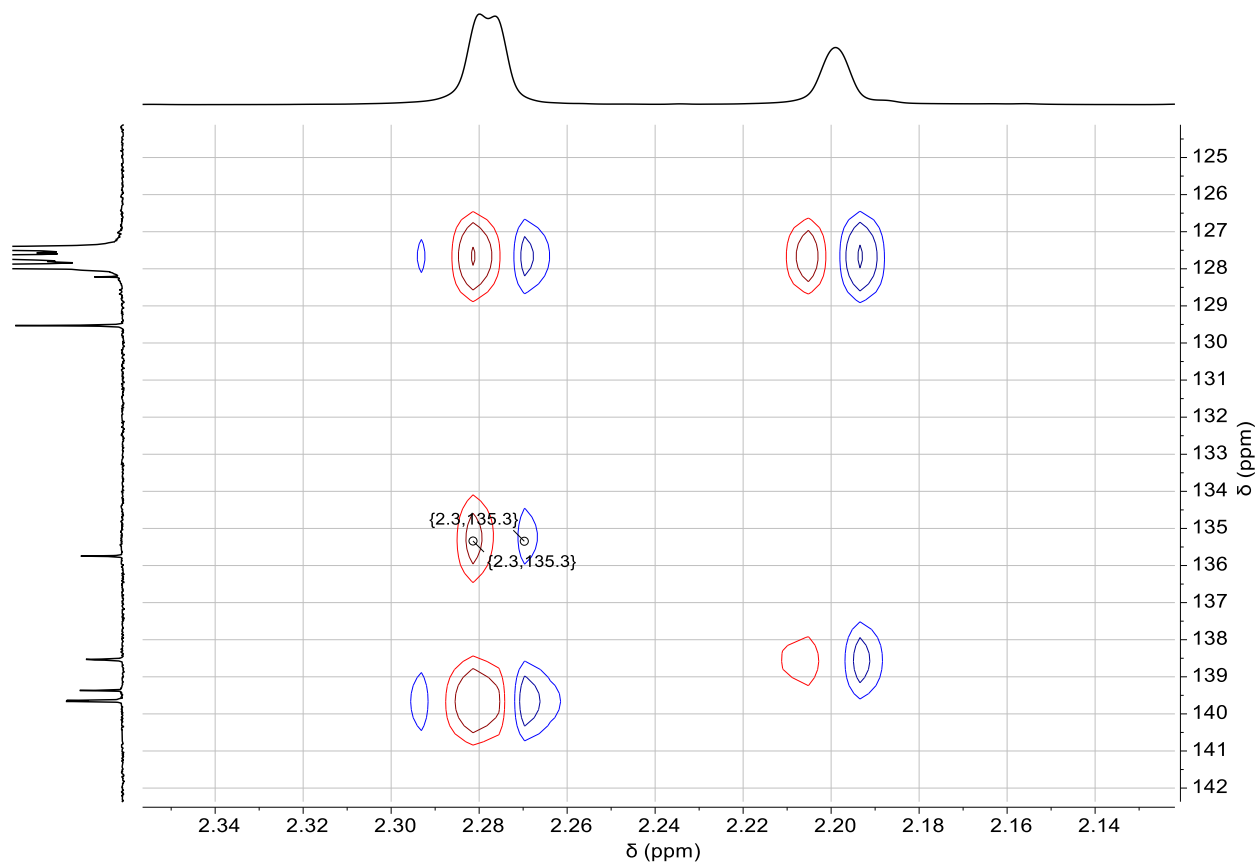

**Figure S46.**  $^1\text{H}$ - $^{13}\text{C}$  HMBC NMR spectrum of **4a**. Labelled peak correlates to  $\text{C}_i$  (Mes).



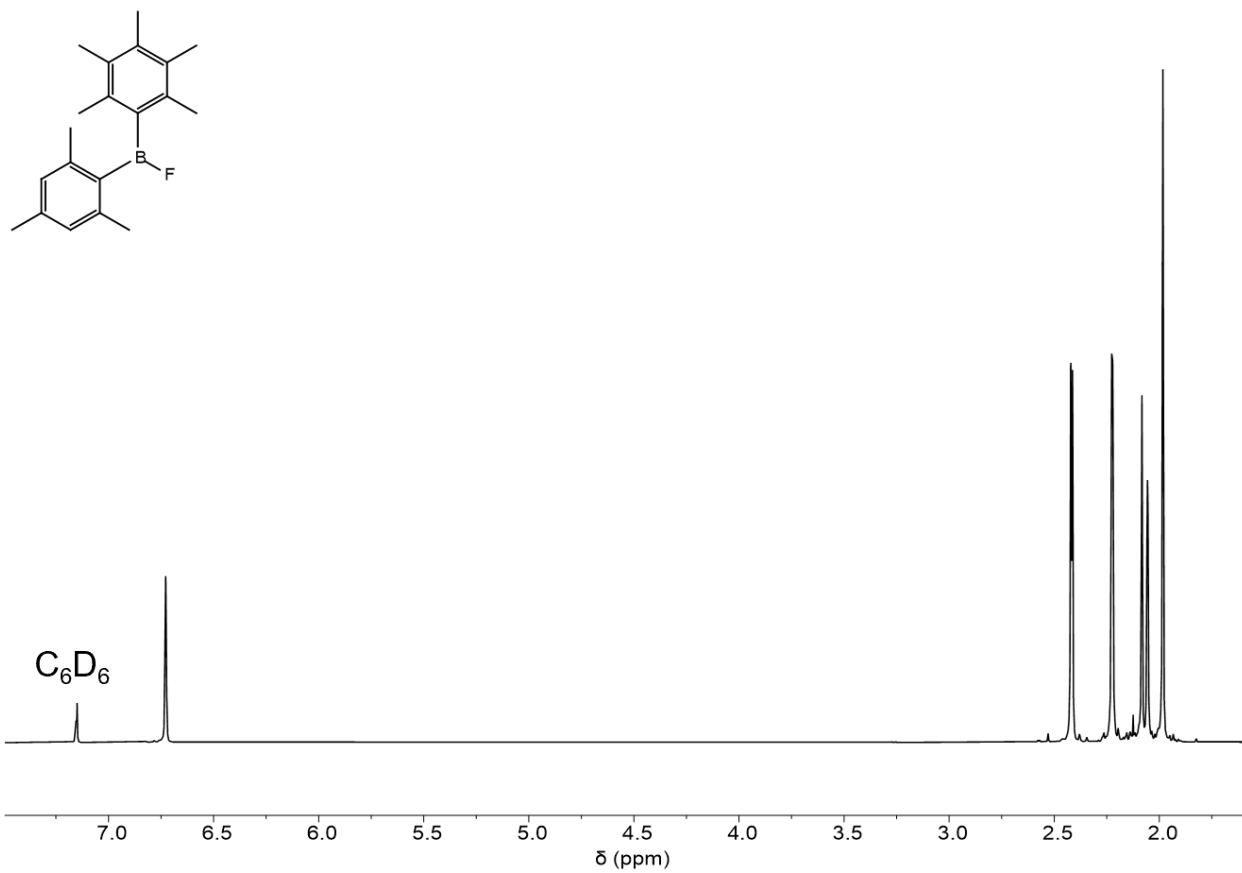

**Figure S47.**  $^1\text{H}$  NMR spectrum of **4b**.

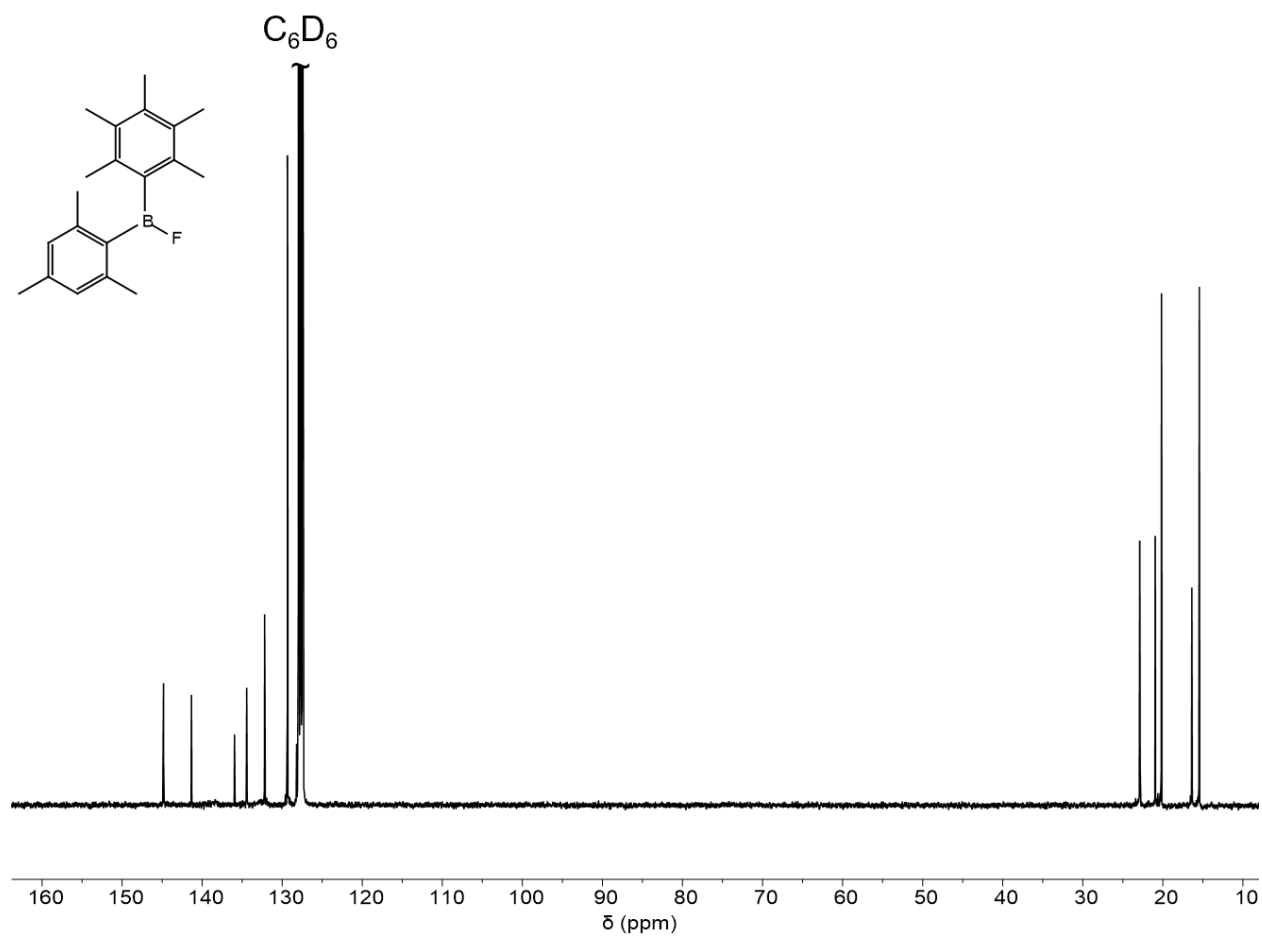

**Figure S48.**  $^{13}\text{C}$  NMR spectrum of **4b**.

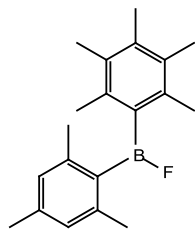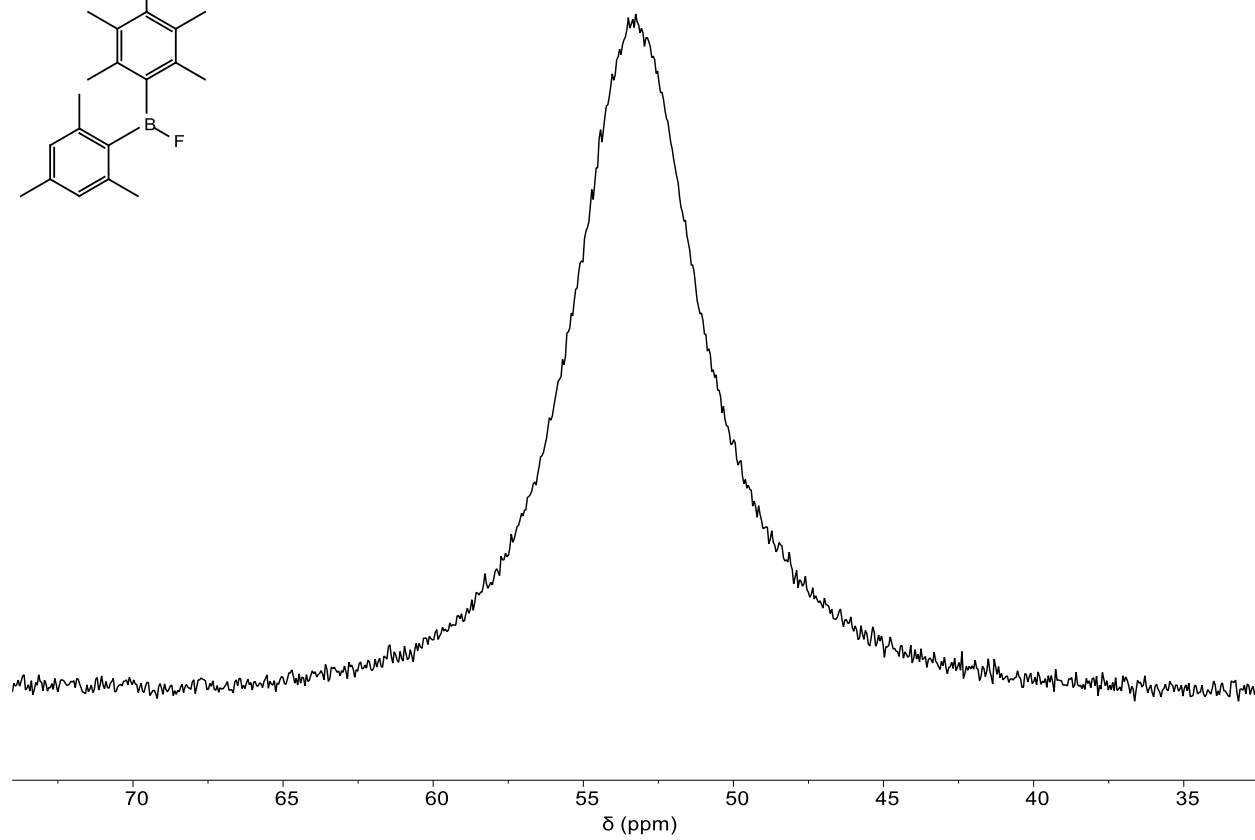

**Figure S49.**  $^{11}\text{B}$  NMR spectrum of **4b**.

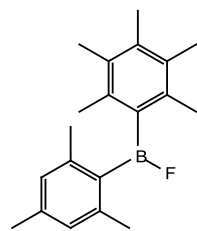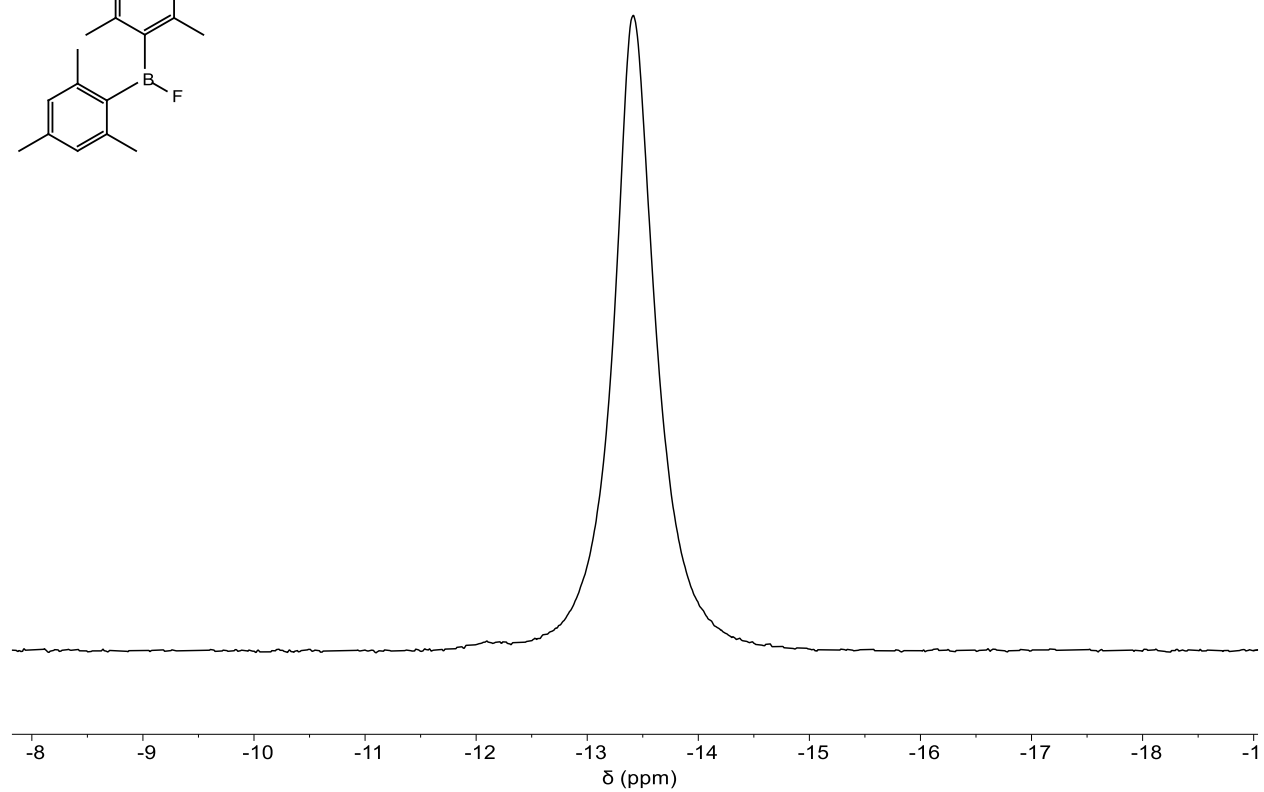

**Figure S50.**  $^{19}\text{F}$  NMR spectrum of **4b**.

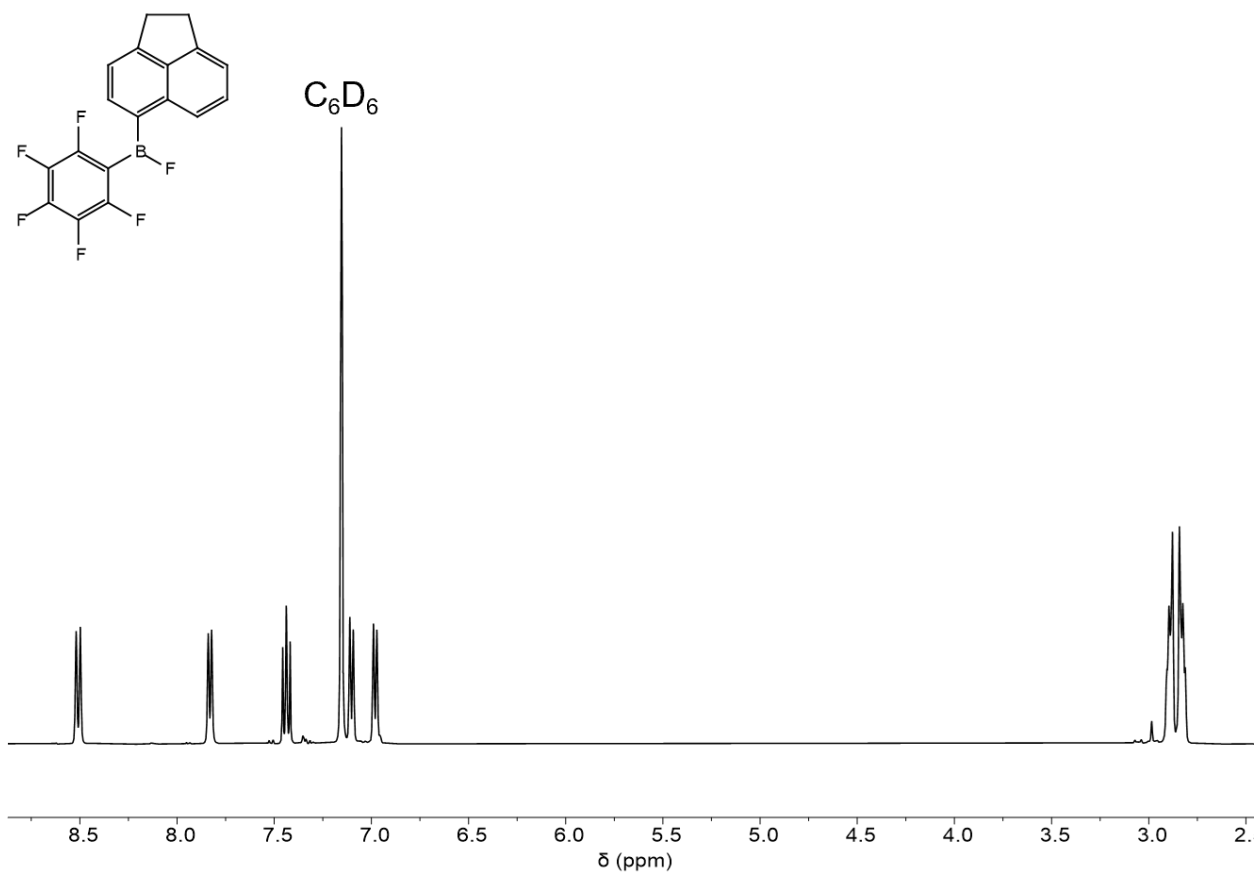

**Figure S51.**  $^1\text{H}$  NMR spectrum of **4c**.

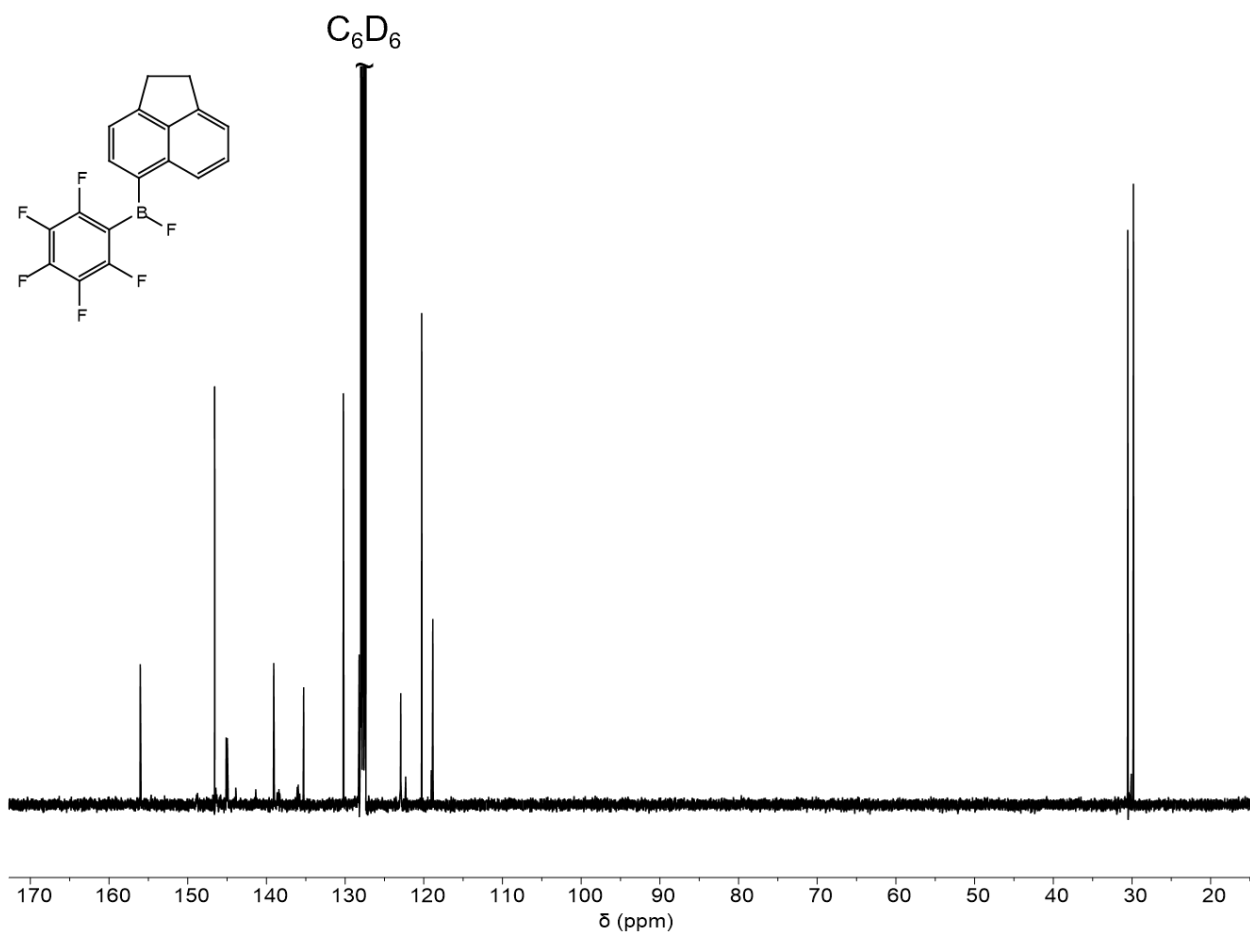

**Figure S52.**  $^{13}\text{C}$  NMR spectrum of **4c**.

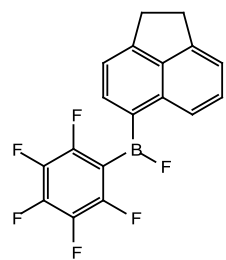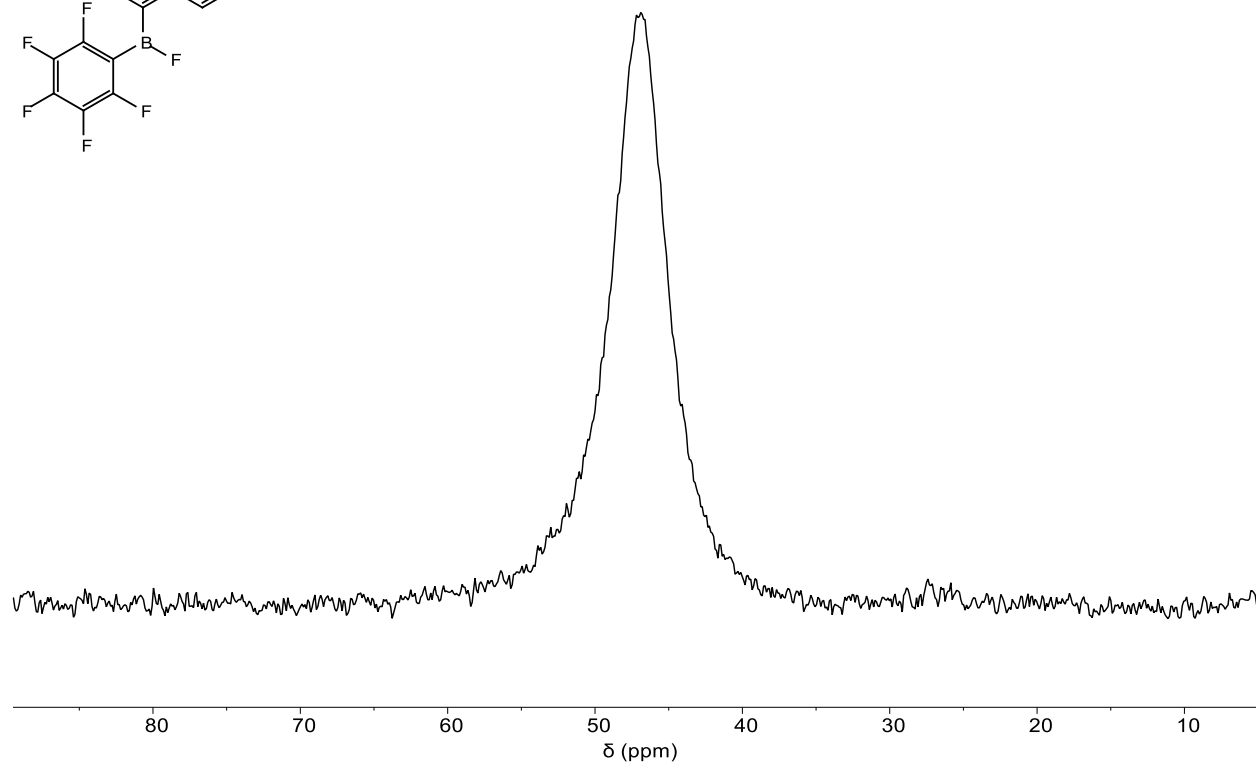

**Figure S53.**  $^{11}\text{B}$  NMR spectrum of **4c**.

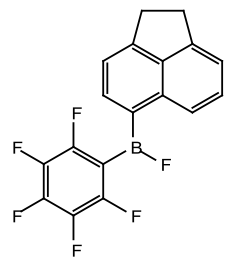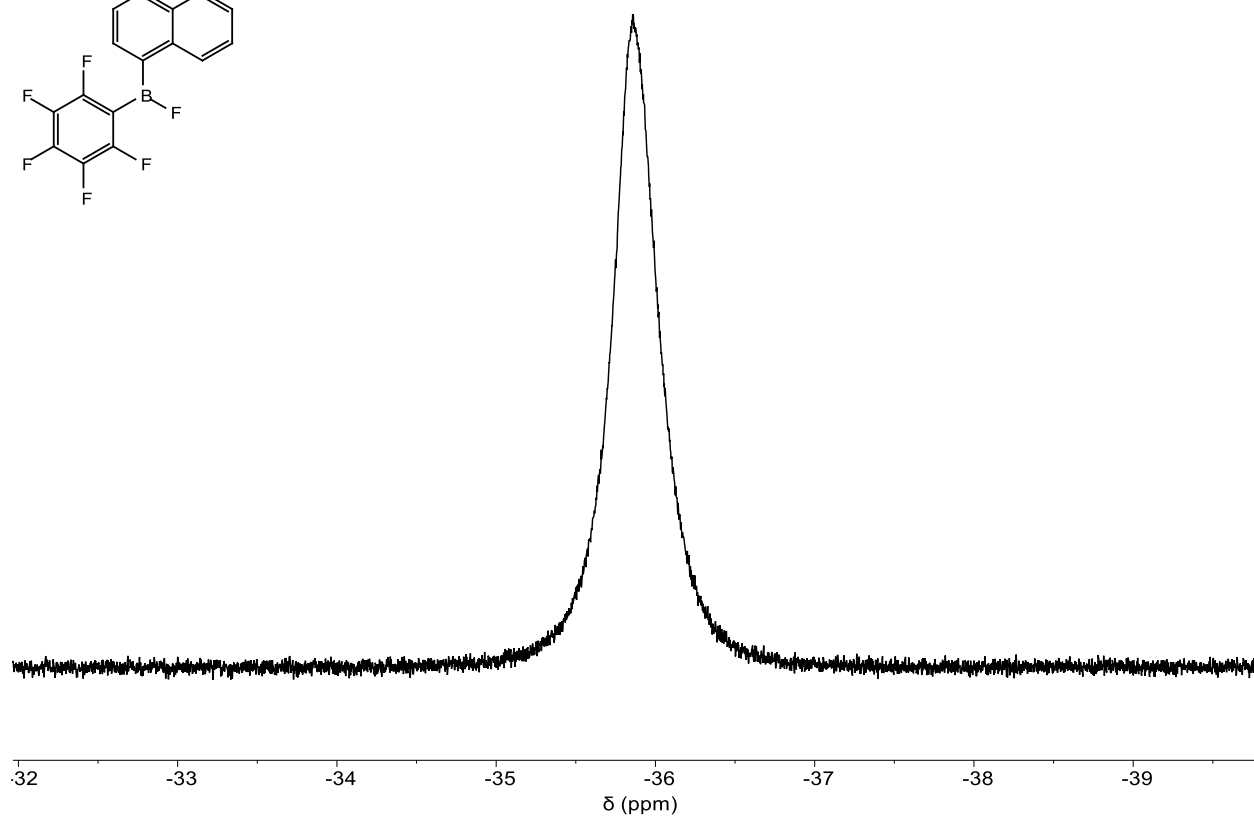

**Figure S54.** Fluorine-on-boron region in the  $^{19}\text{F}$  NMR spectrum of **4c**.



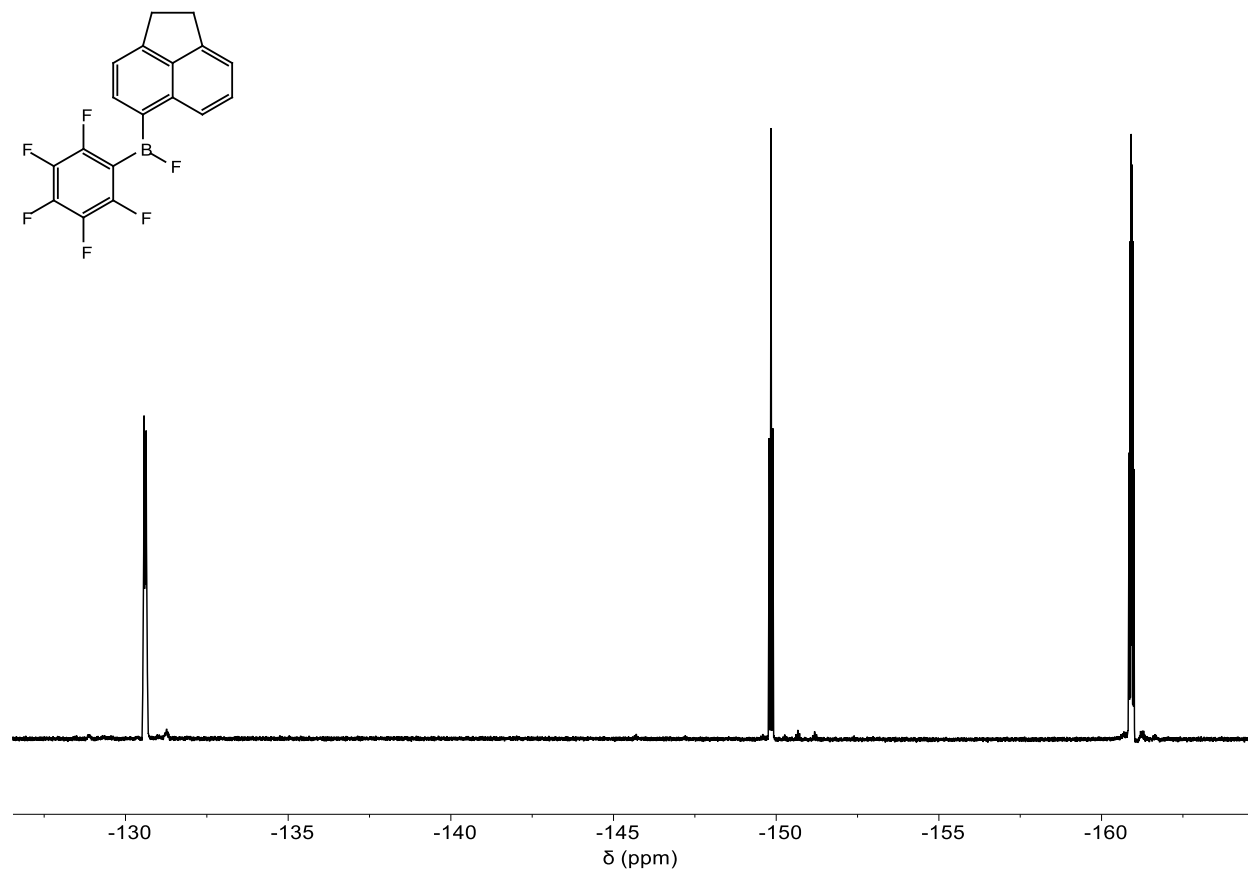

**Figure S55.** Fluorine-on-carbon region in the  $^{19}\text{F}$  NMR spectrum of **4c**.

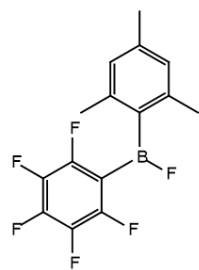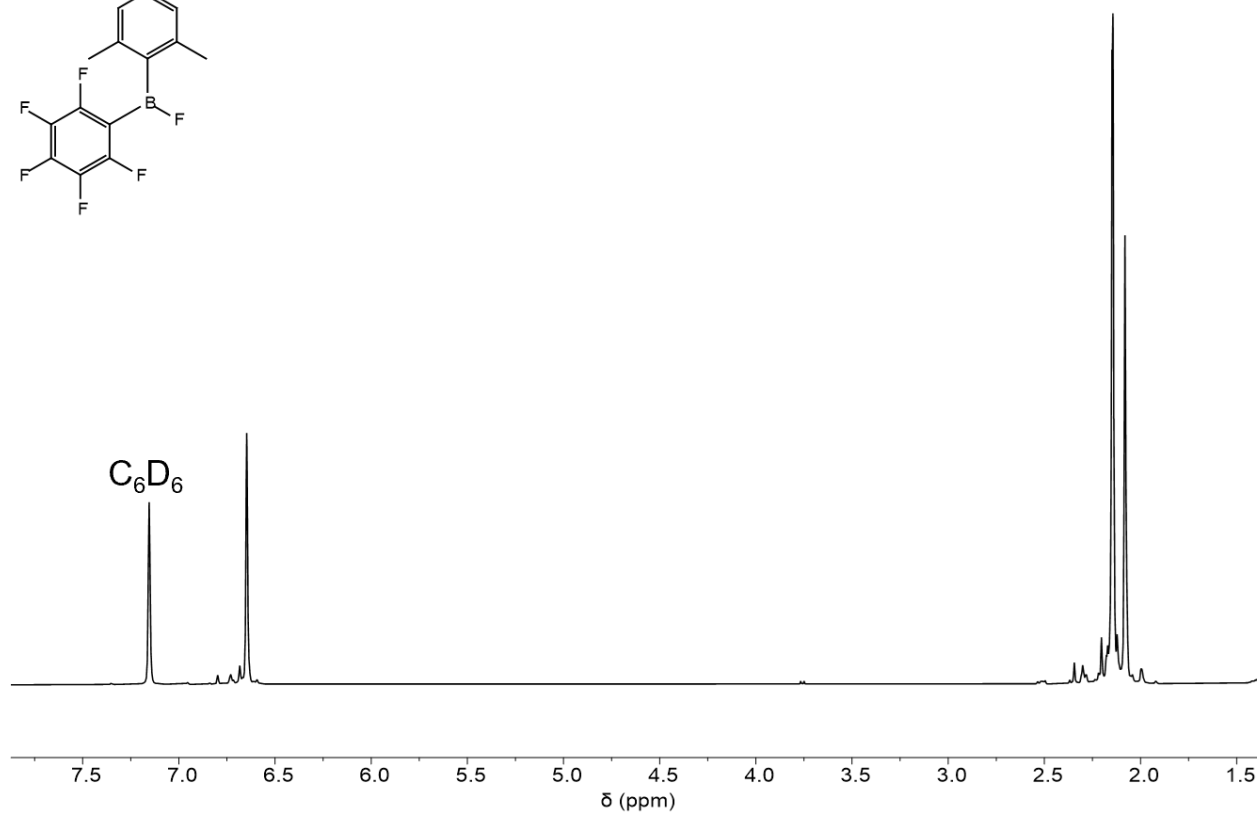

**Figure S56.**  $^1\text{H}$  NMR spectrum of **4d**.

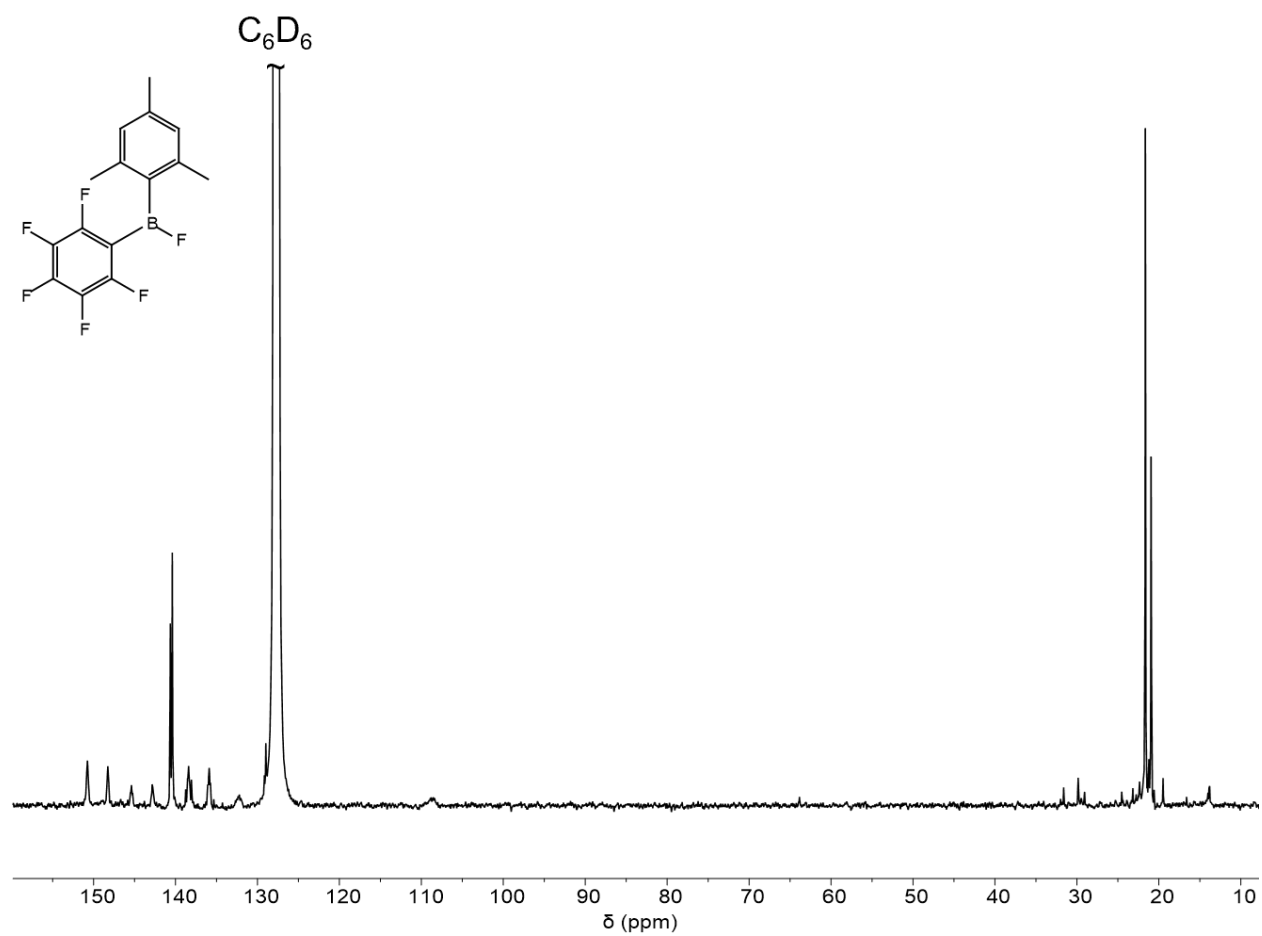

**Figure S57.**  $^{13}\text{C}$  NMR spectrum of **4d**.

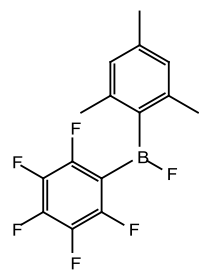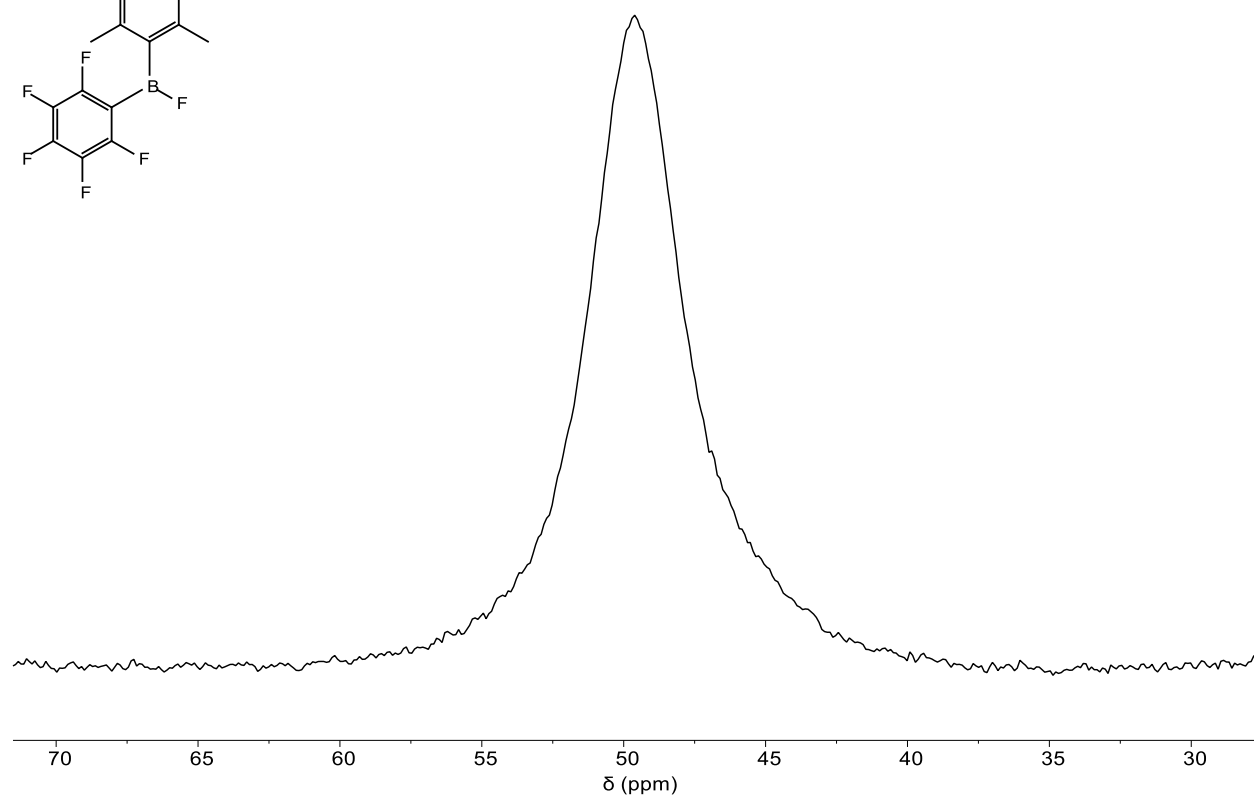

**Figure S58.**  $^{11}\text{B}$  NMR spectrum of **4d**.

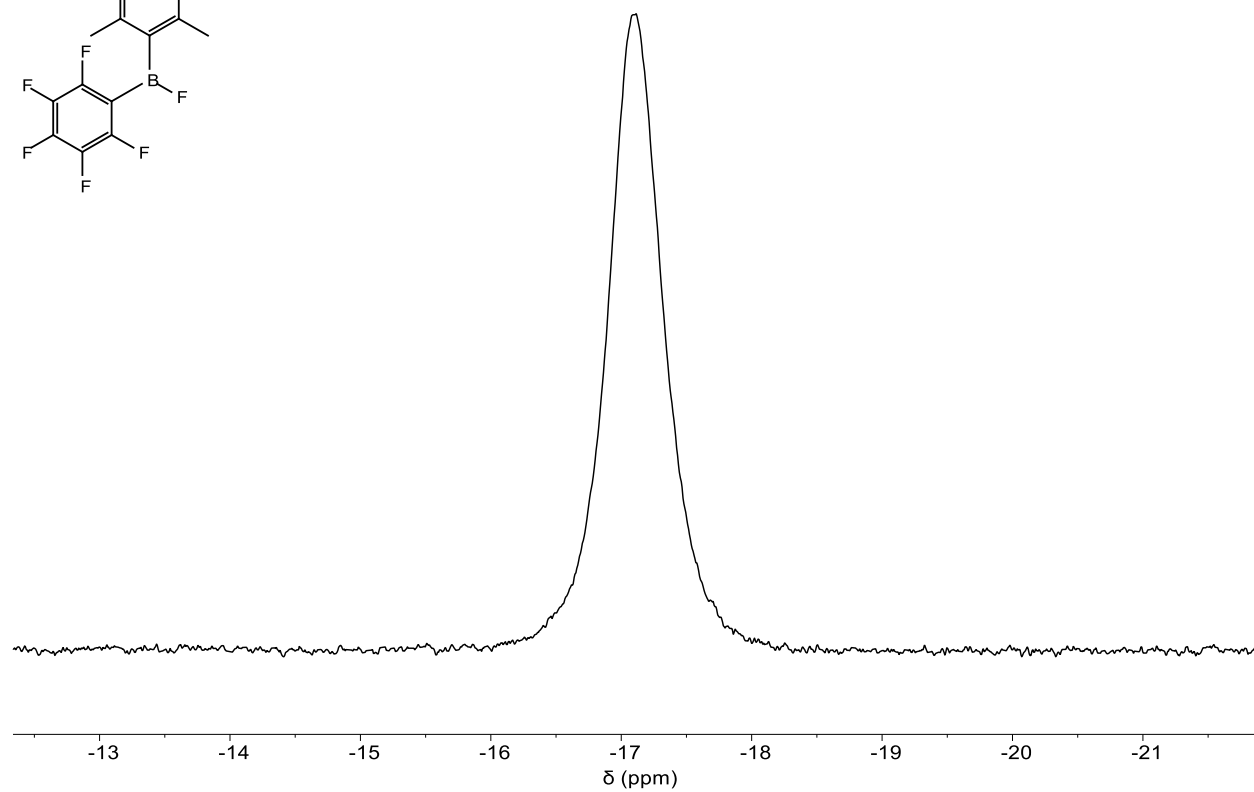

**Figure S59.** Fluorine-on-boron region in the  $^{19}\text{F}$  NMR spectrum of **4d**.

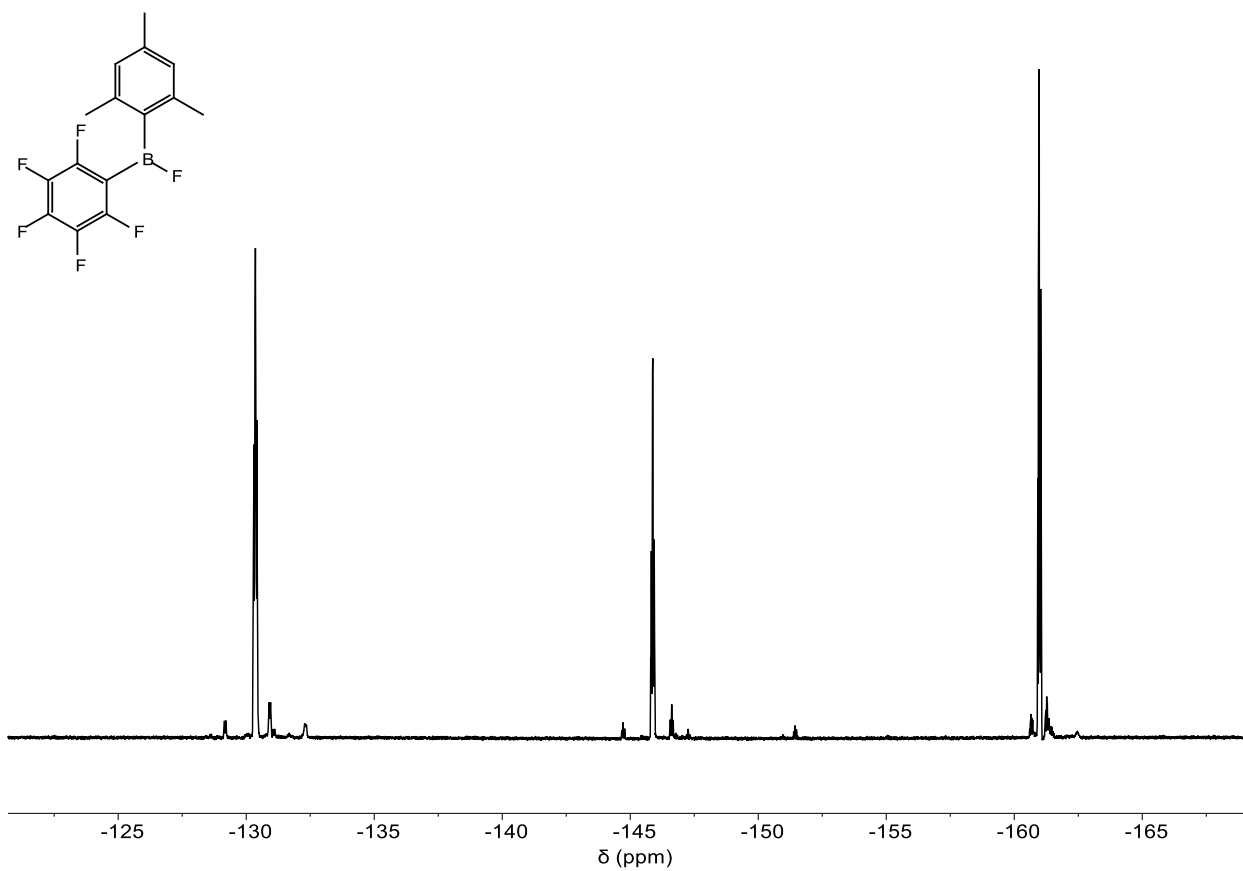

**Figure S60.** Fluorine-on-carbon region in the  $^{19}\text{F}$  NMR spectrum of **4d**.

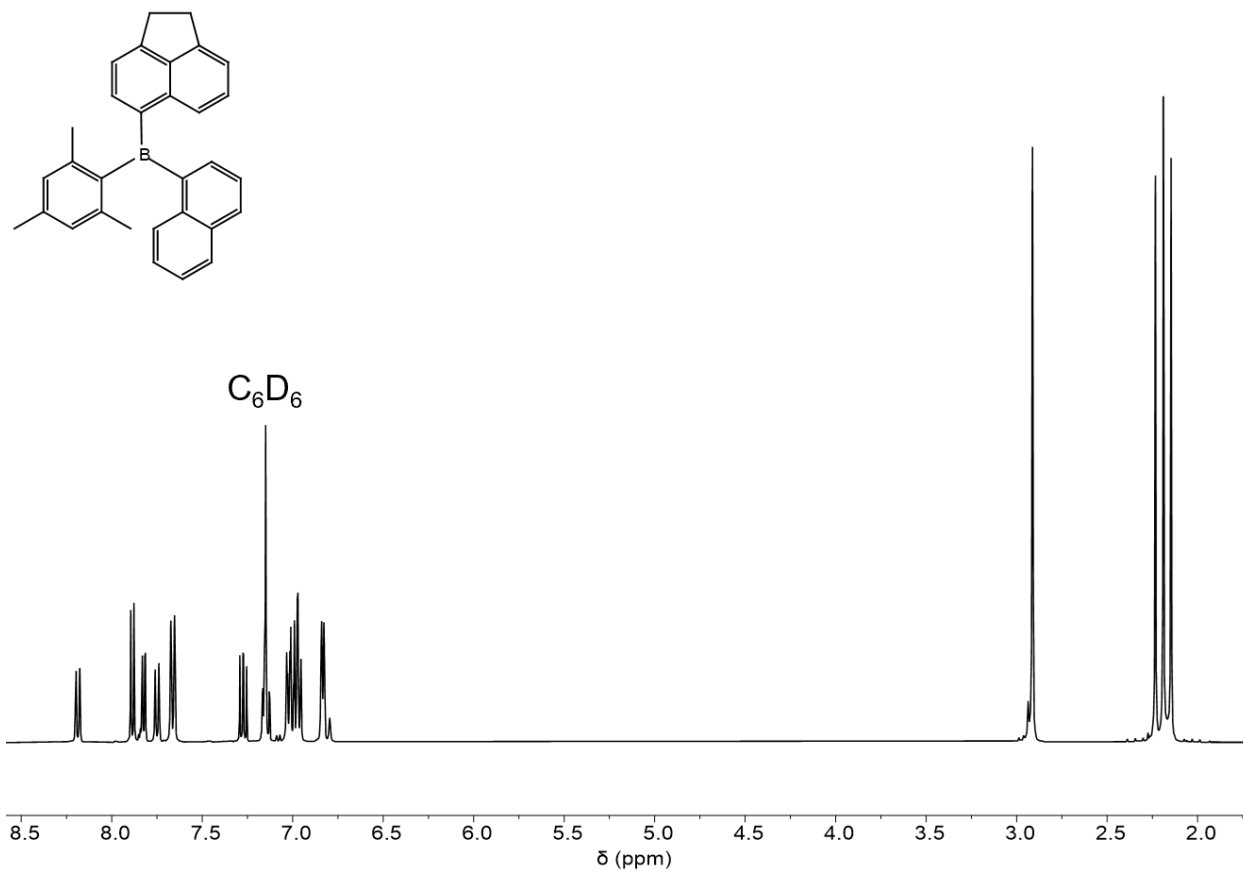

**Figure S61.** <sup>1</sup>H NMR spectrum of **5a**.

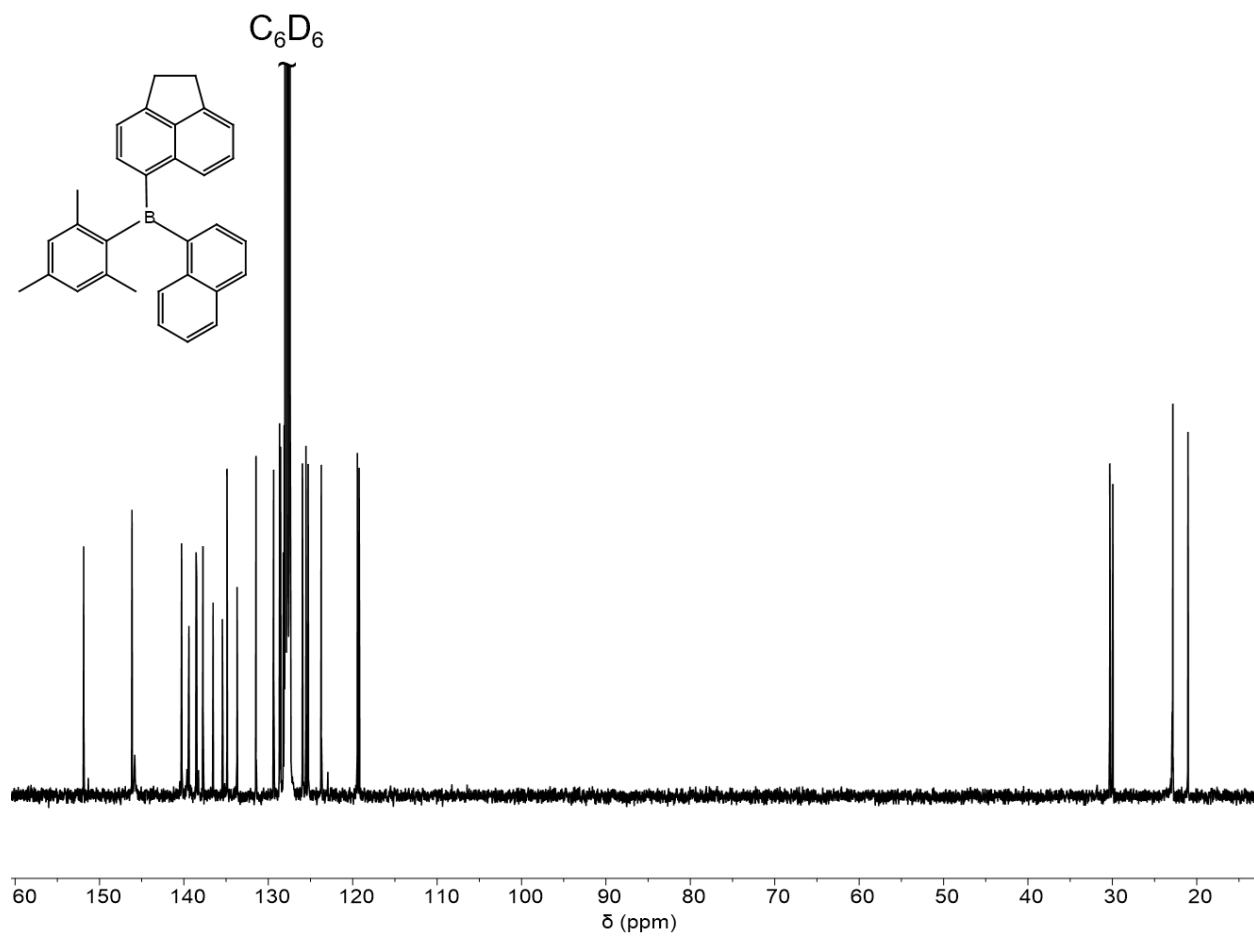

**Figure S62.**  $^{13}\text{C}$  NMR spectrum of **5a**.



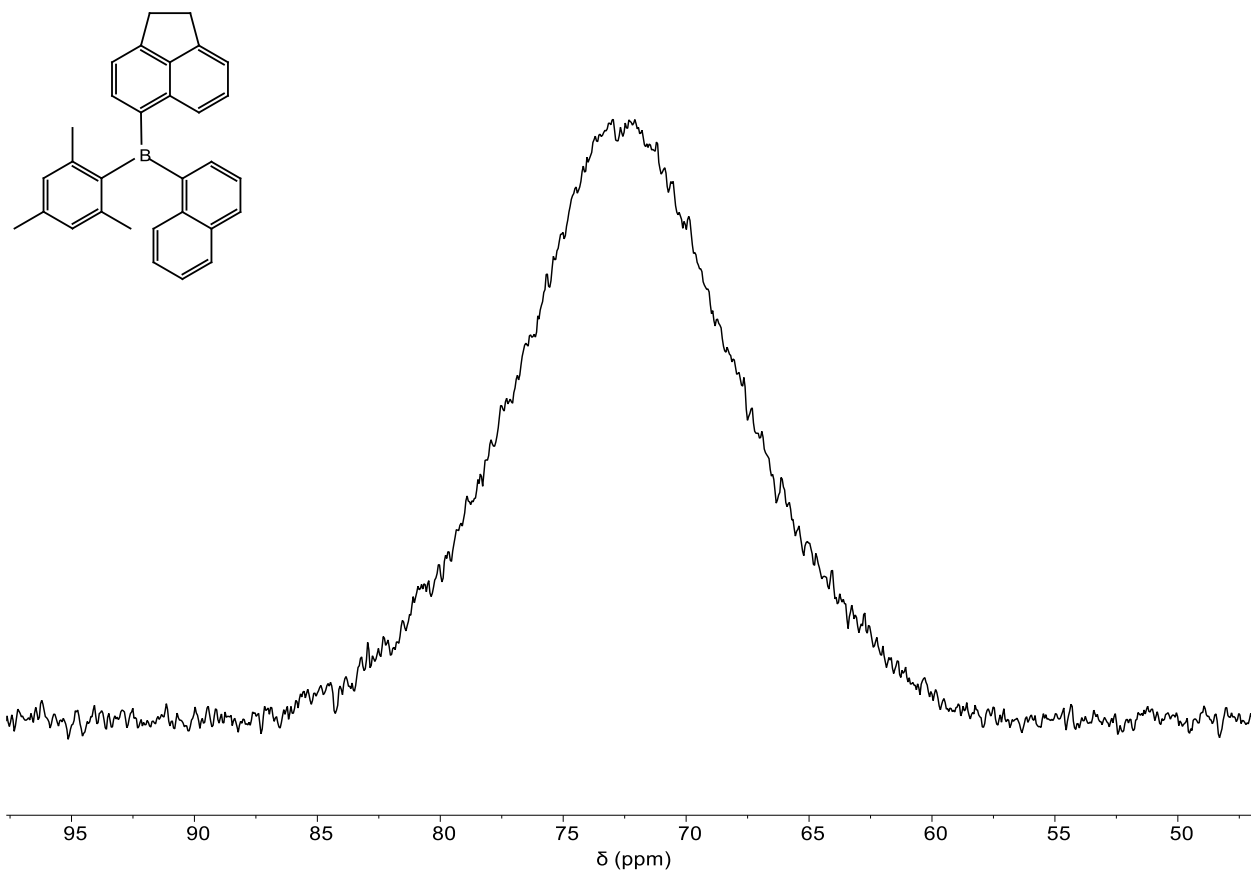

**Figure S63.**  $^{11}\text{B}$  NMR spectrum of **5a**.

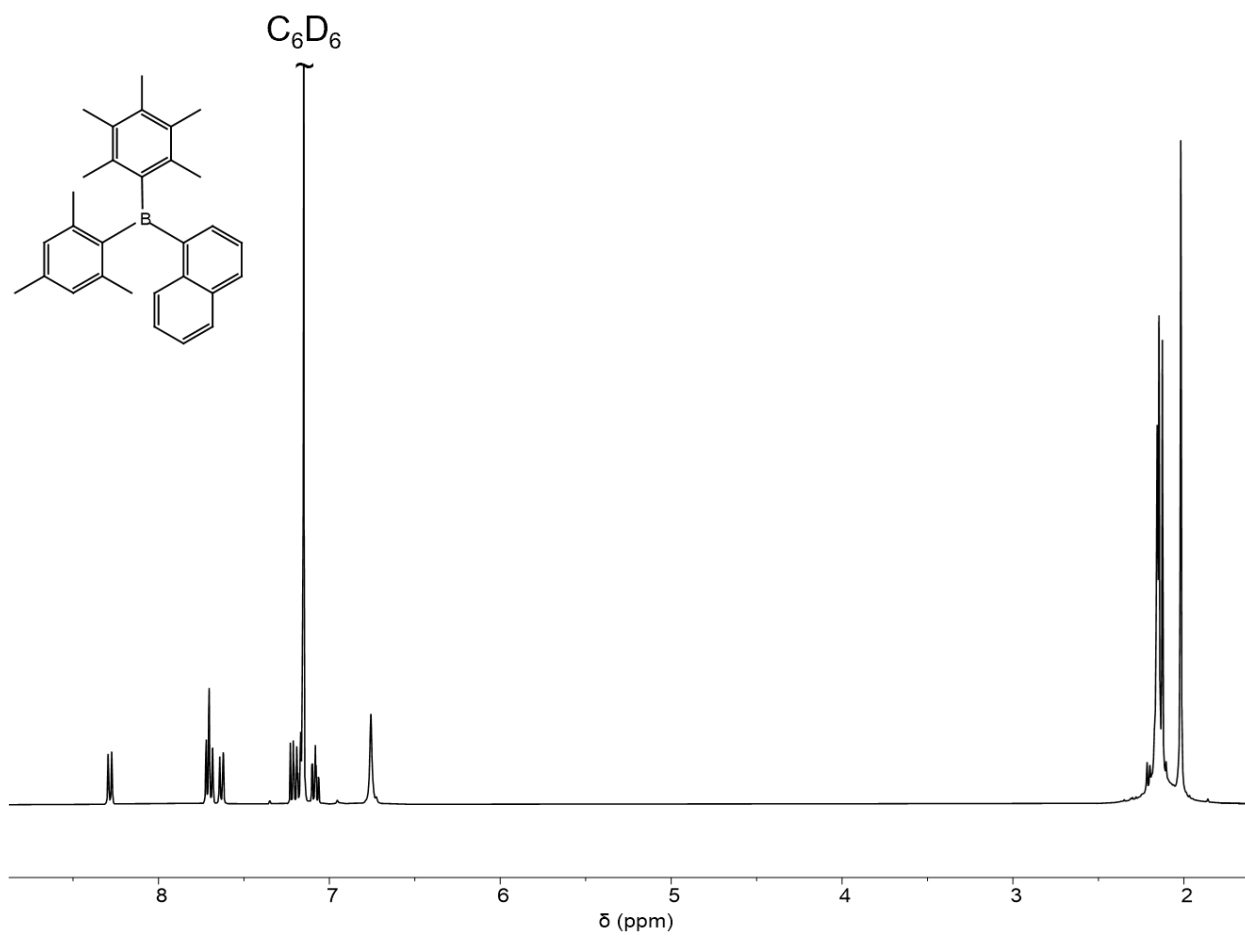

**Figure S64.**  $^1\text{H}$  NMR spectrum of **5b**.

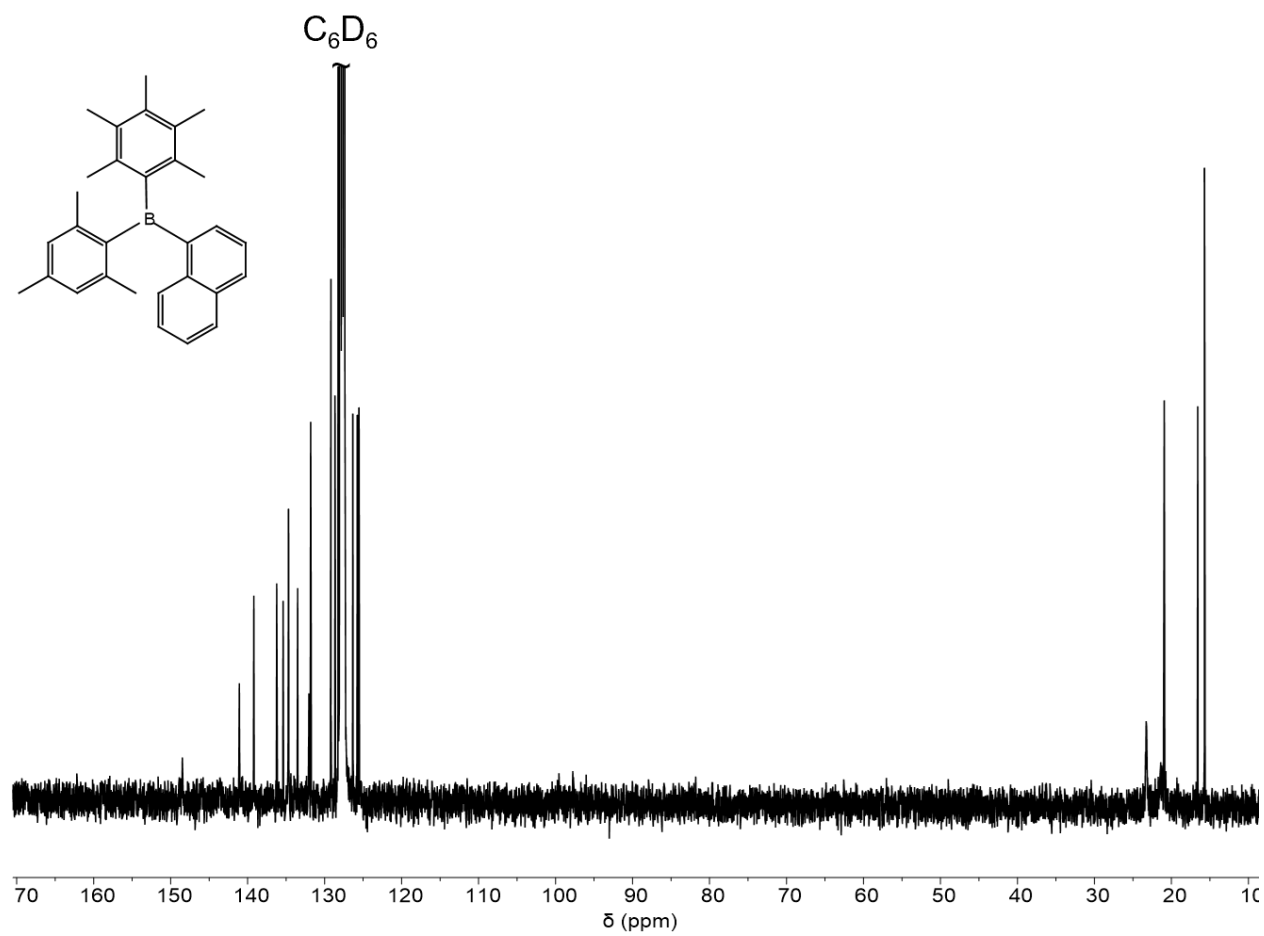

**Figure S65.**  $^{13}\text{C}$  NMR spectrum of **5b**.

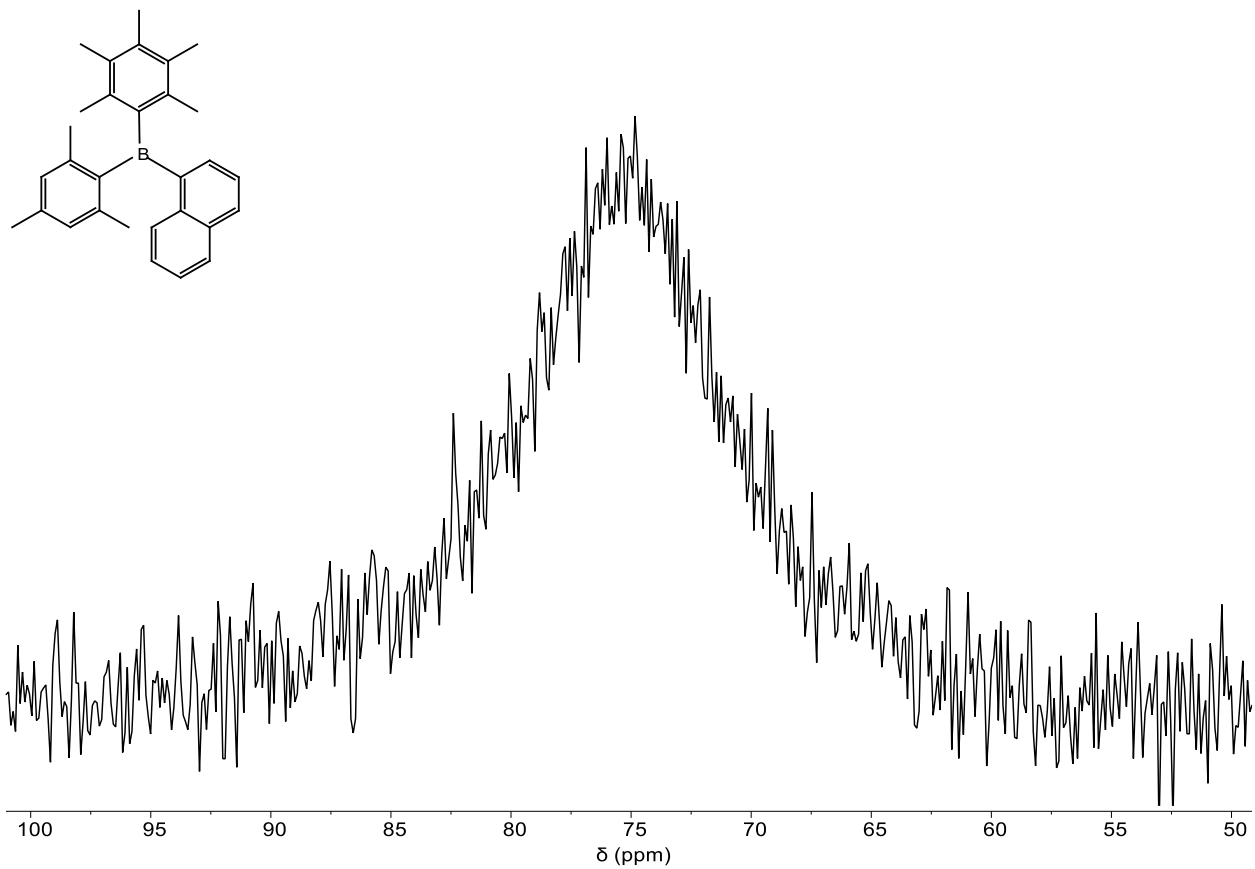

**Figure S66.**  $^{11}\text{B}$  NMR spectrum of **5b**.

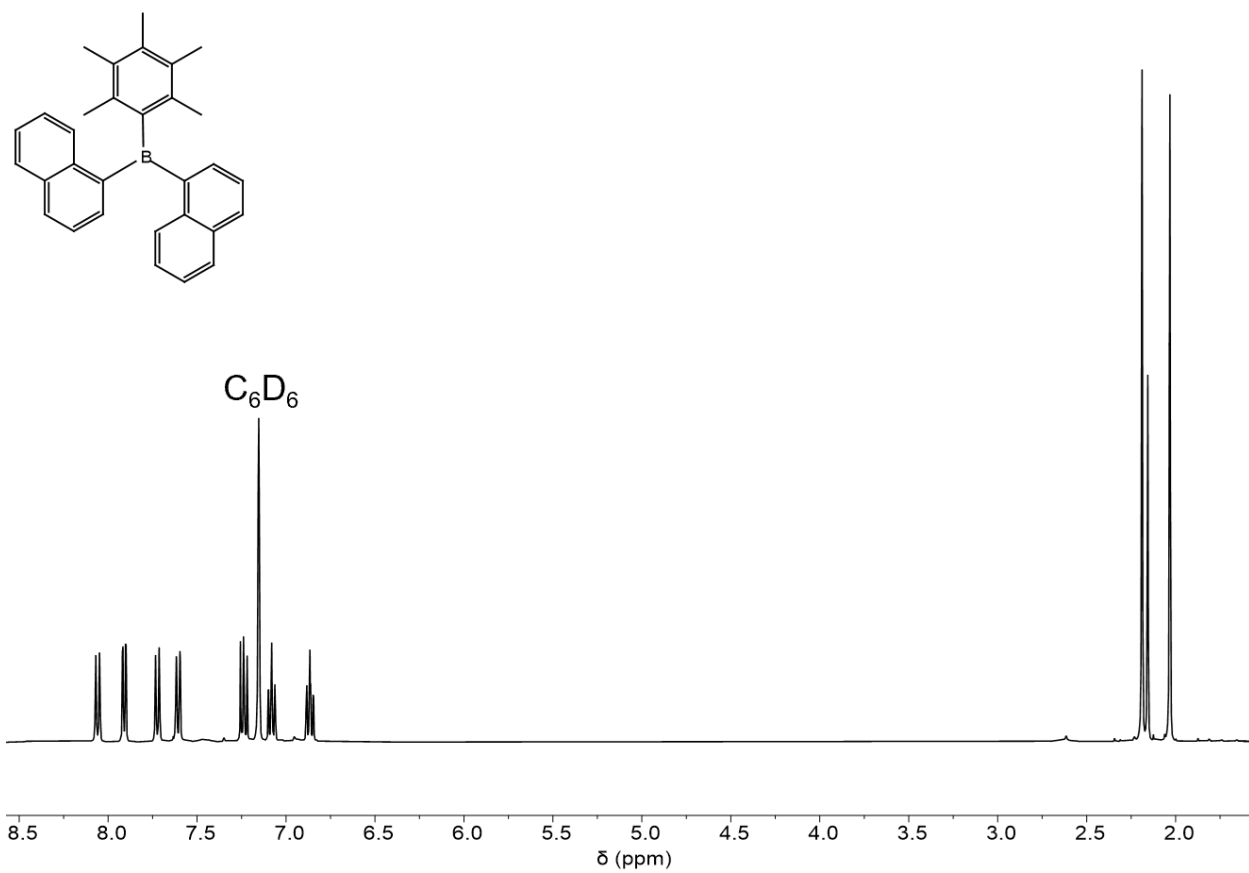

**Figure S67.**  $^1\text{H}$  NMR spectrum of **5c**.

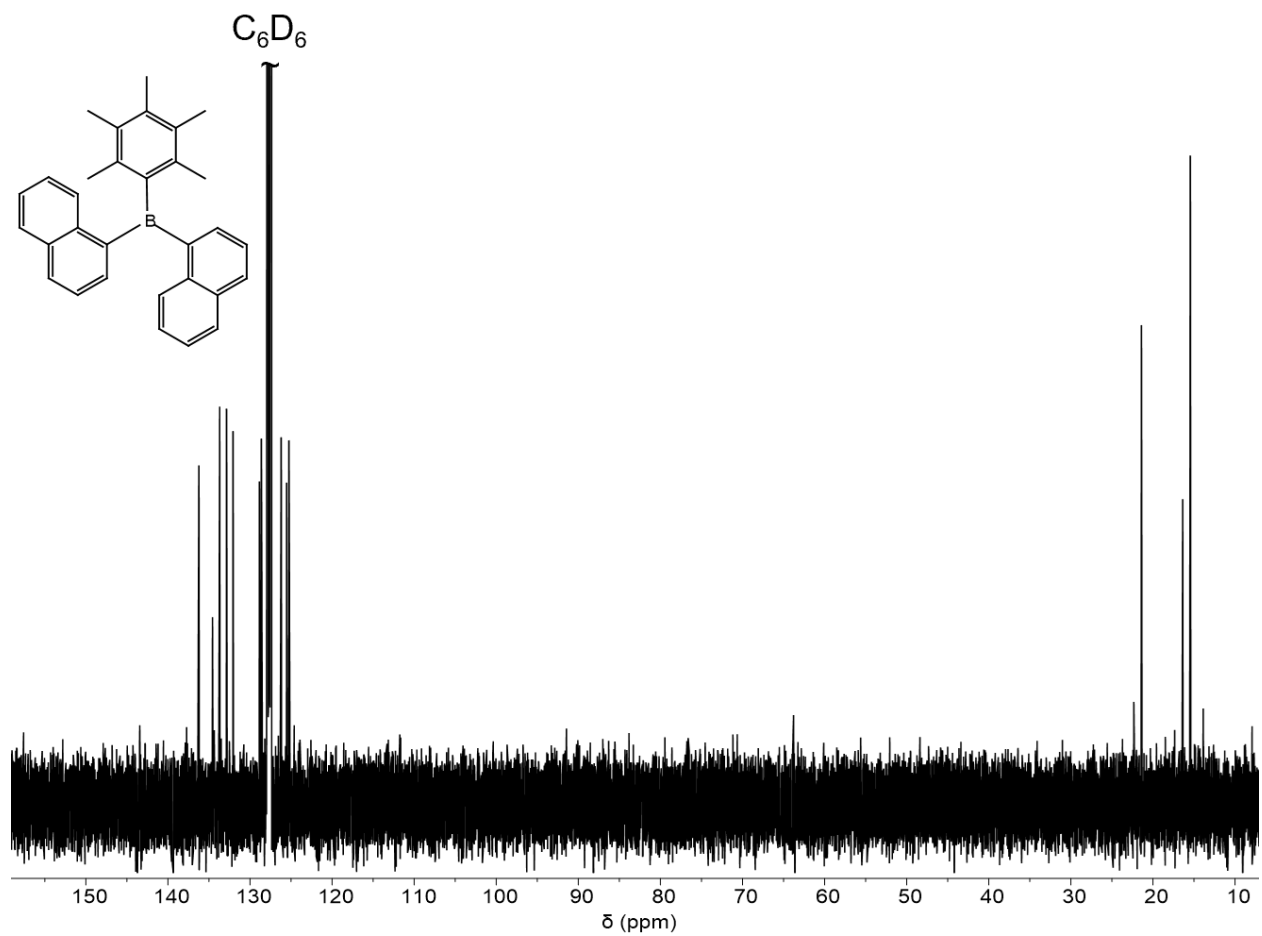

**Figure S68.**  $^{13}\text{C}$  NMR spectrum of **5c**.

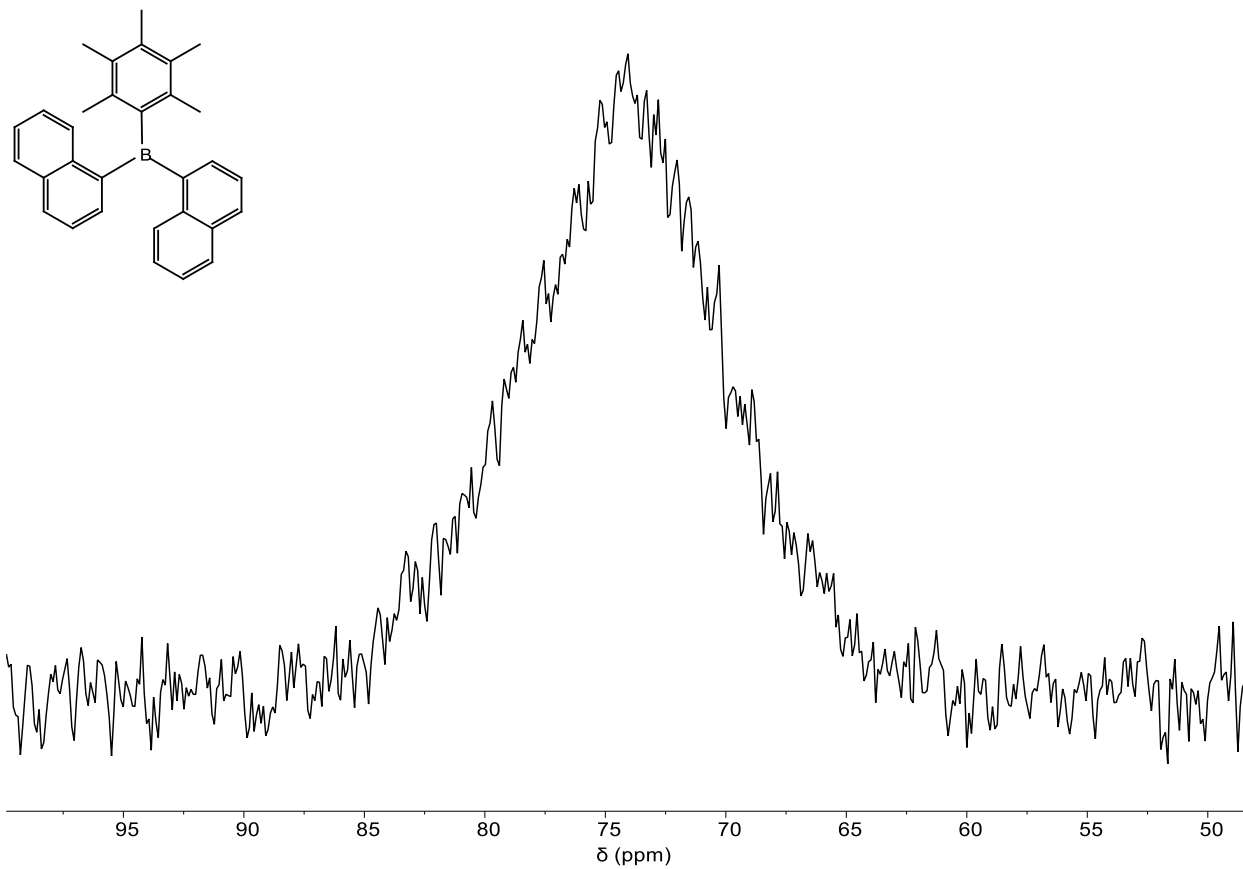

**Figure S69.**  $^{11}\text{B}$  NMR spectrum of **5c**.

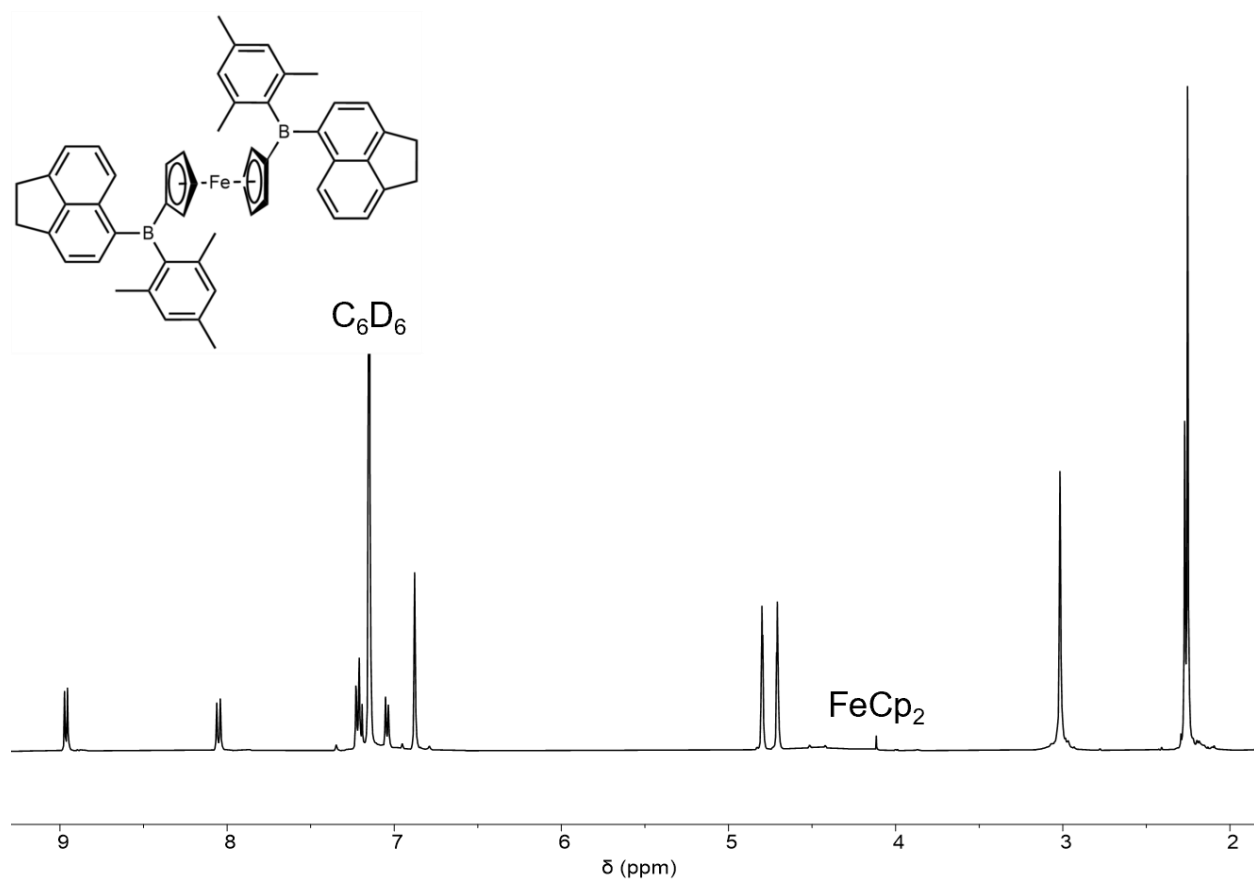

**Figure S70.**  $^1\text{H}$  NMR spectrum of **6**.



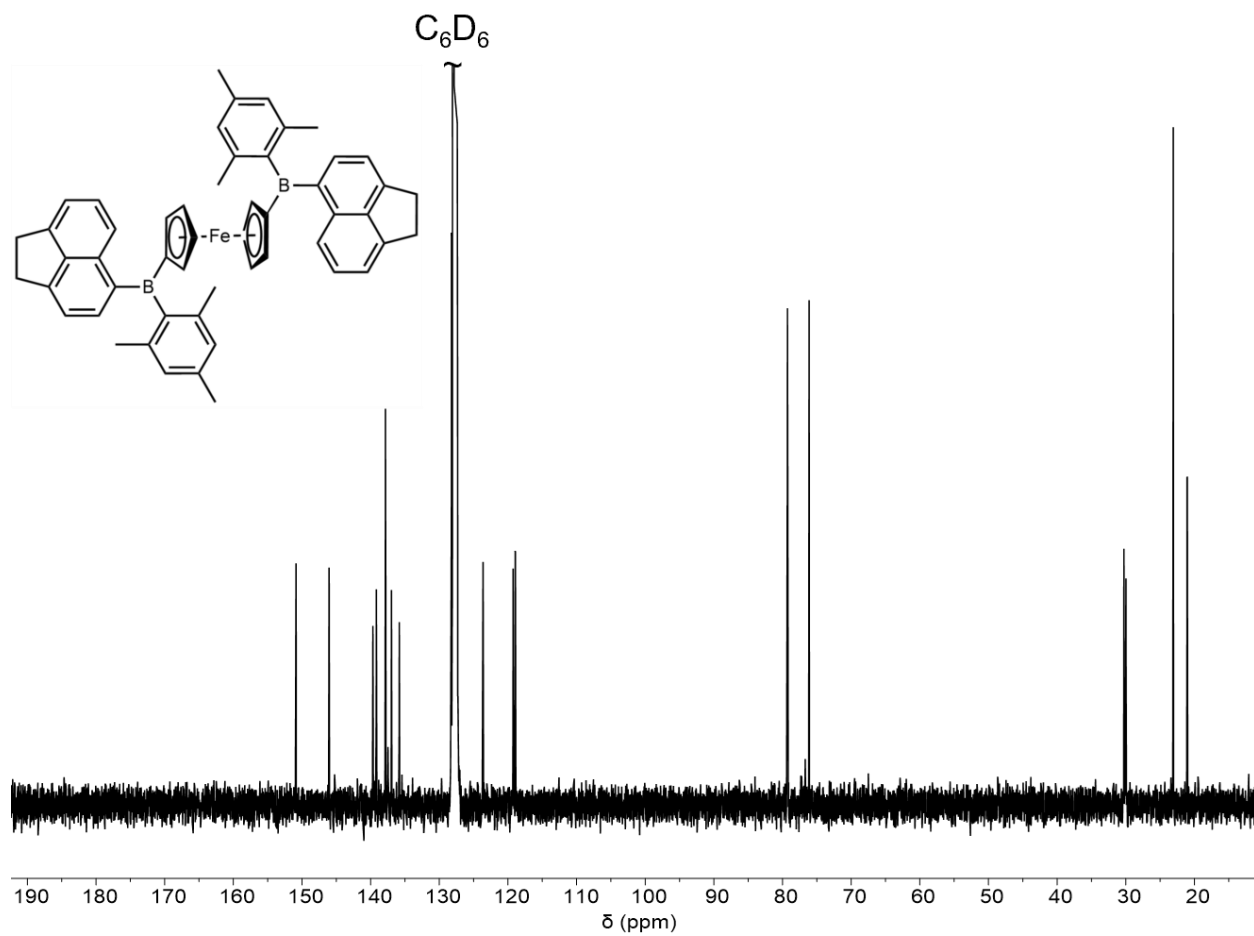

**Figure S71.**  $^{13}\text{C}$  NMR spectrum of **6**.

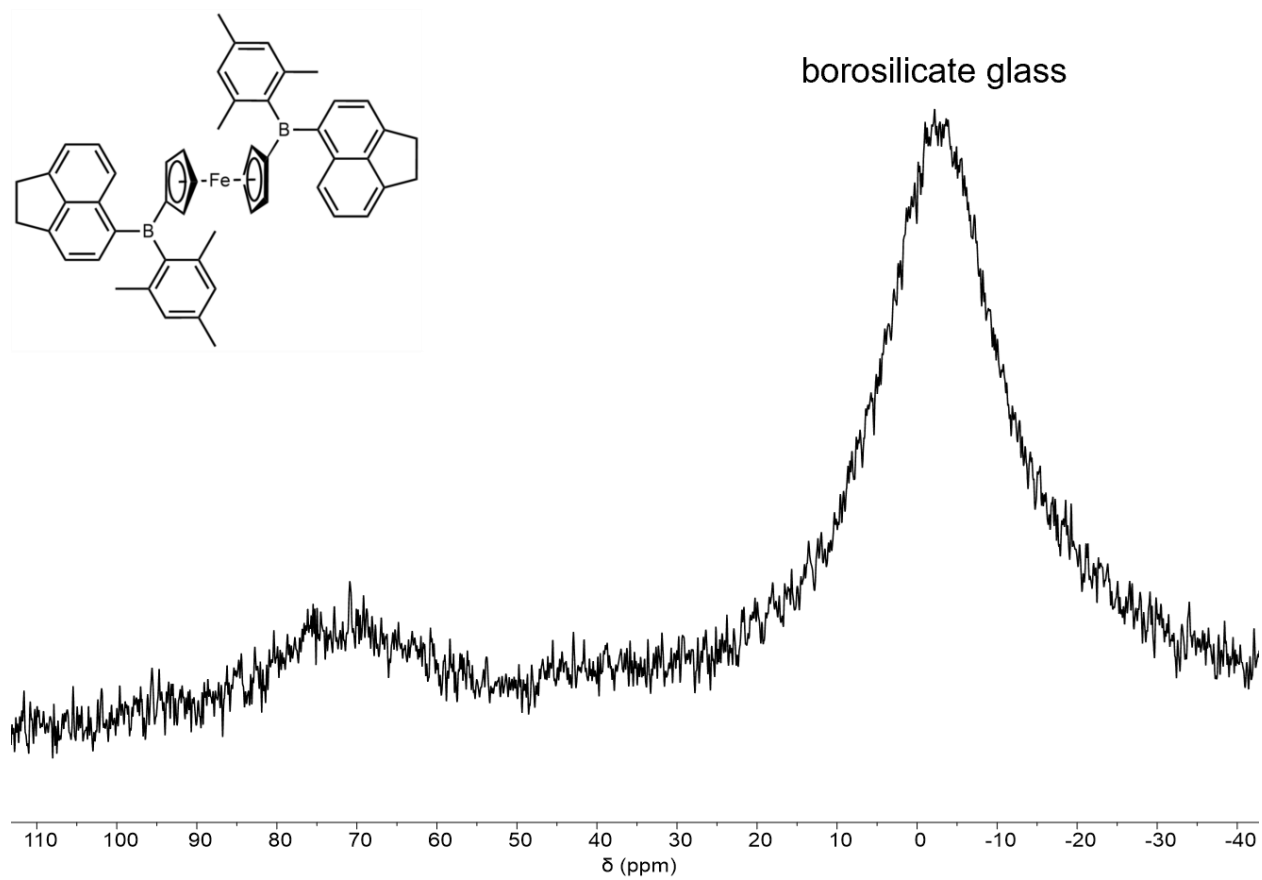

**Figure S72.**  $^{11}\text{B}$  NMR spectrum of **6**.

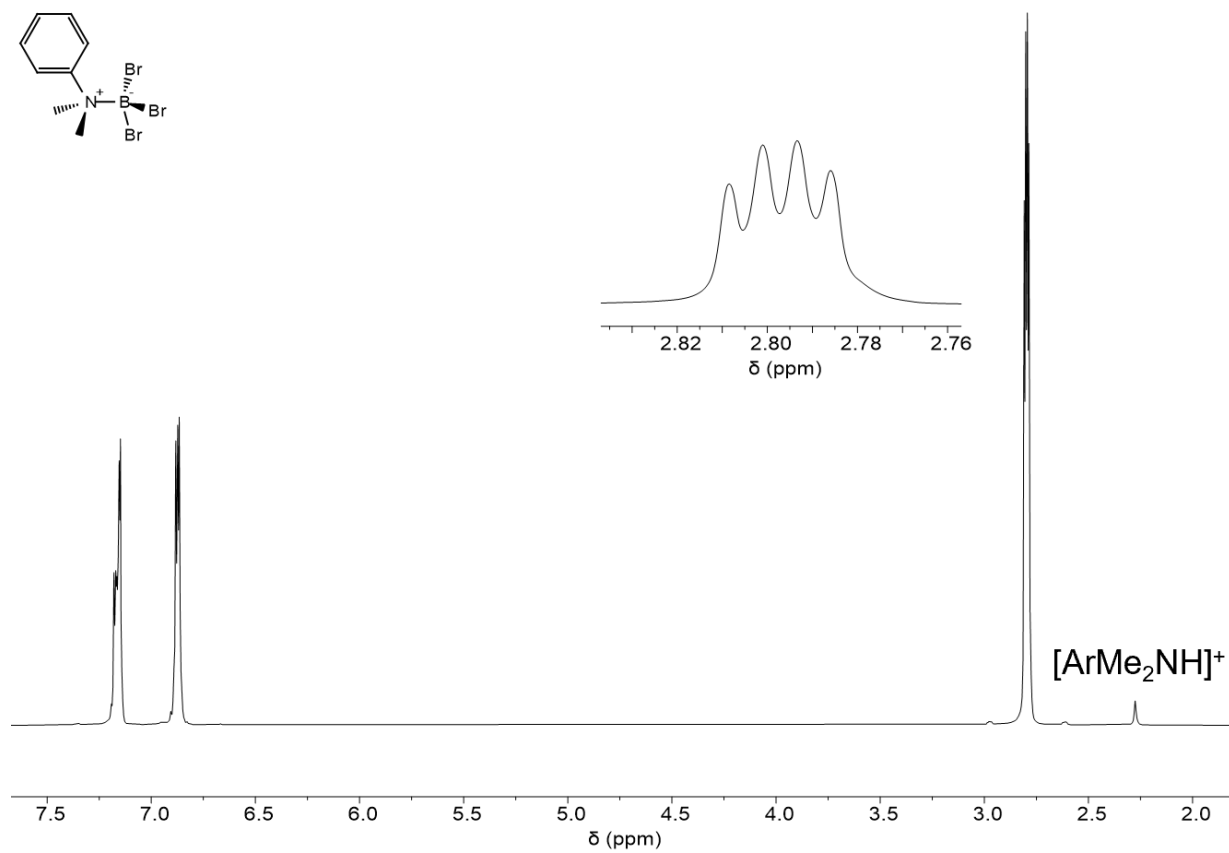

**Figure S73.**  $^1\text{H}$  NMR spectrum of  $\text{BBr}_3 \cdot \text{NMe}_2\text{Ph}$ .

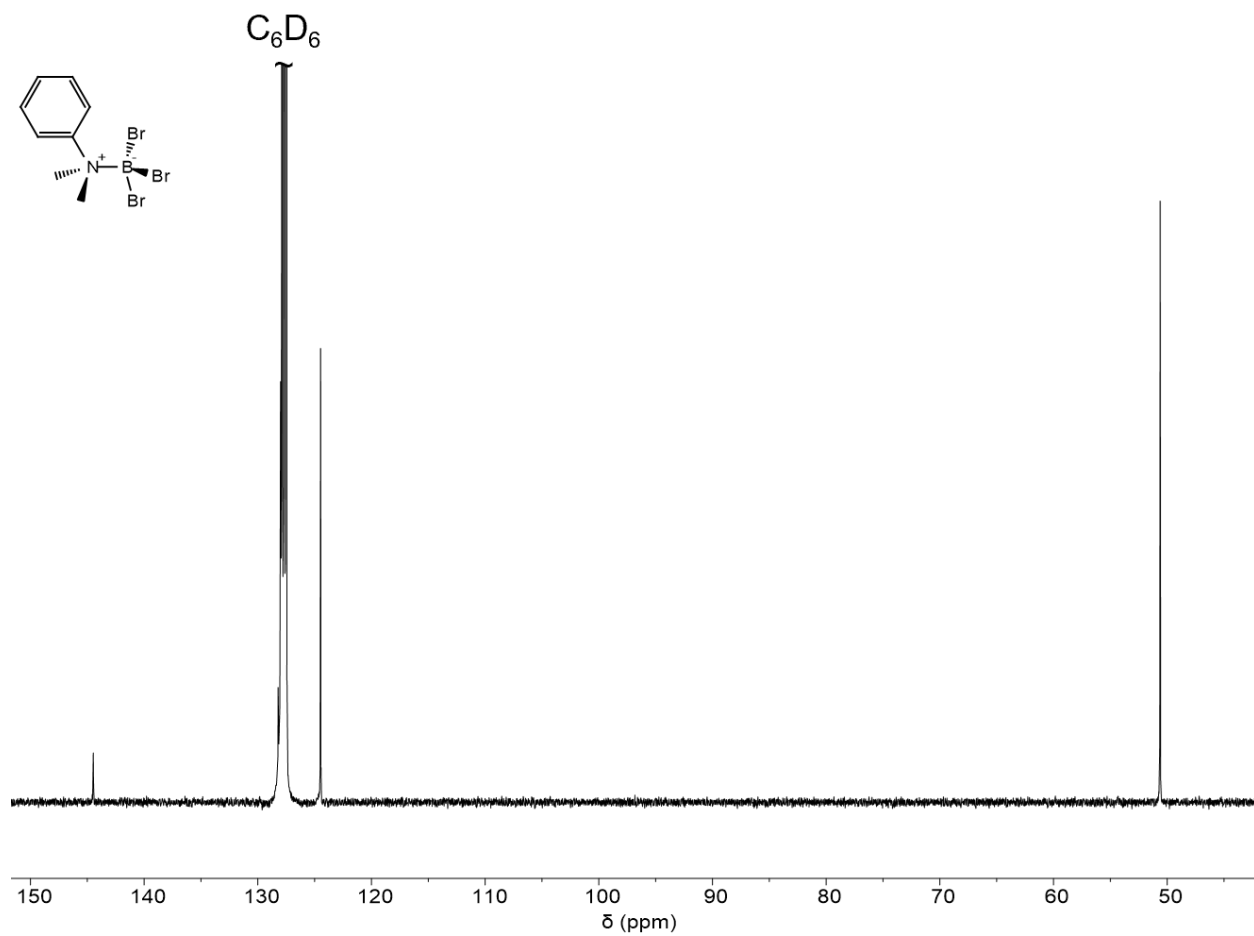

**Figure S74.**  $^{13}\text{C}$  NMR spectrum of  $\text{BBr}_3 \cdot \text{NMe}_2\text{Ph}$ .

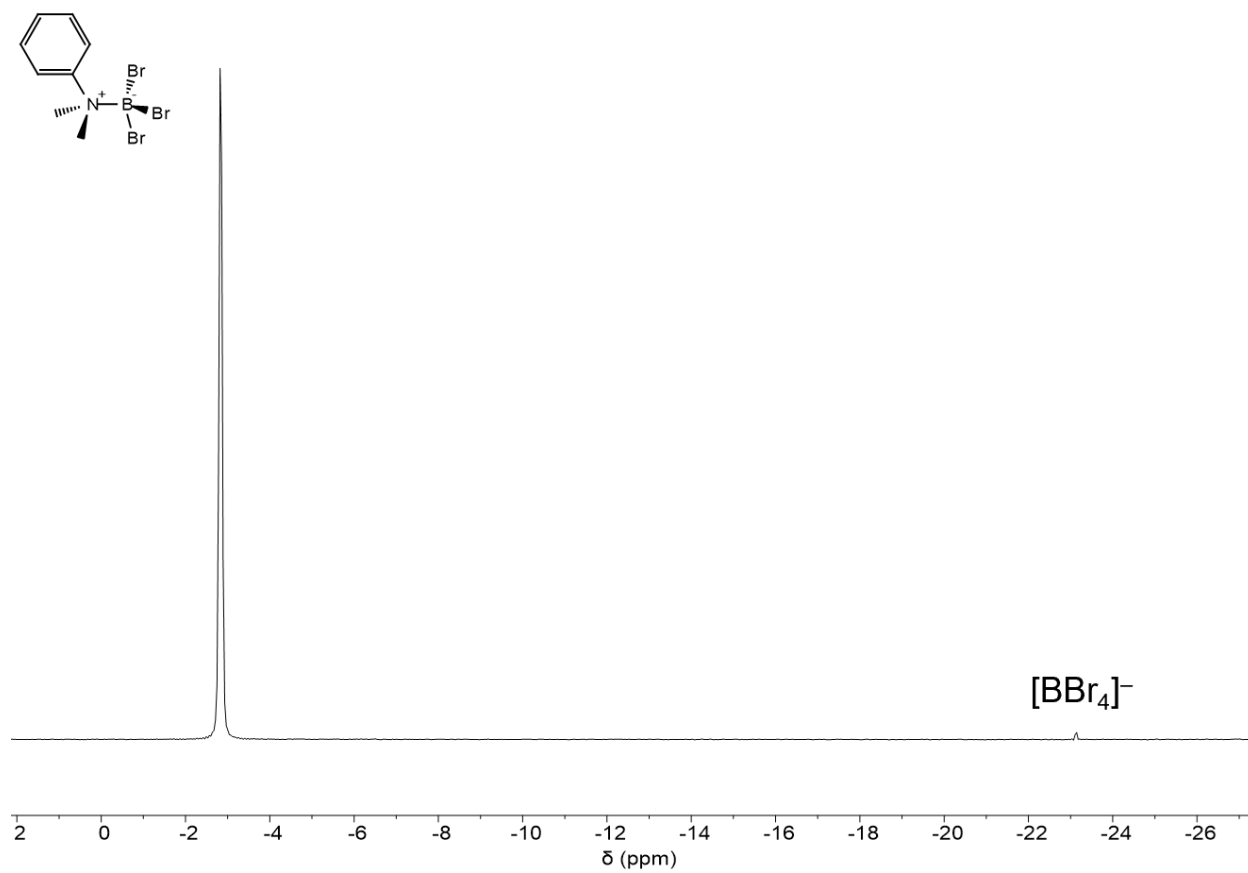

**Figure S75.**  $^{11}\text{B}$  NMR spectrum of  $\text{BBr}_3 \cdot \text{NMe}_2\text{Ph}$ .

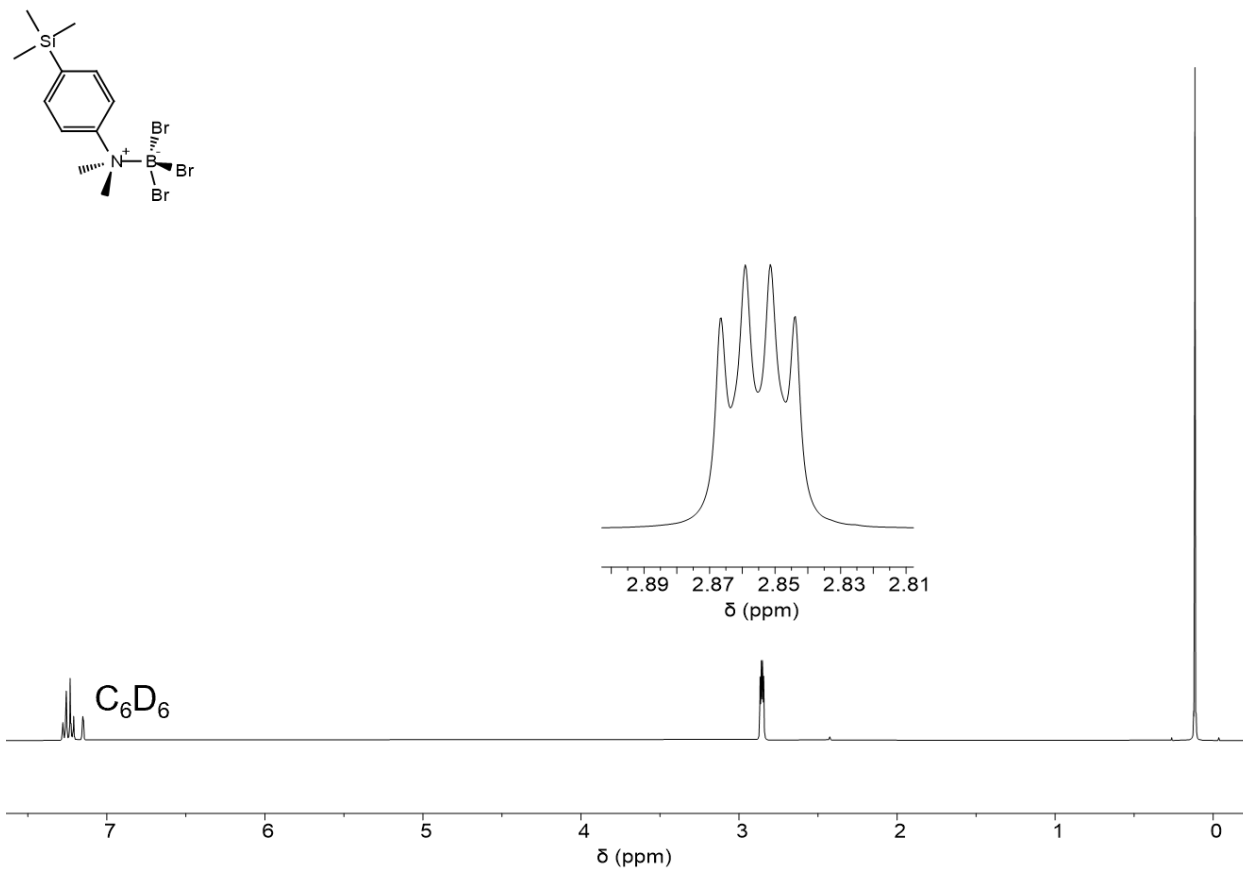

**Figure S76.**  $^1\text{H}$  NMR spectrum of  $\text{BBr}_3 \cdot \text{NMe}_2(4\text{-C}_6\text{H}_4\text{SiMe}_3)$ .

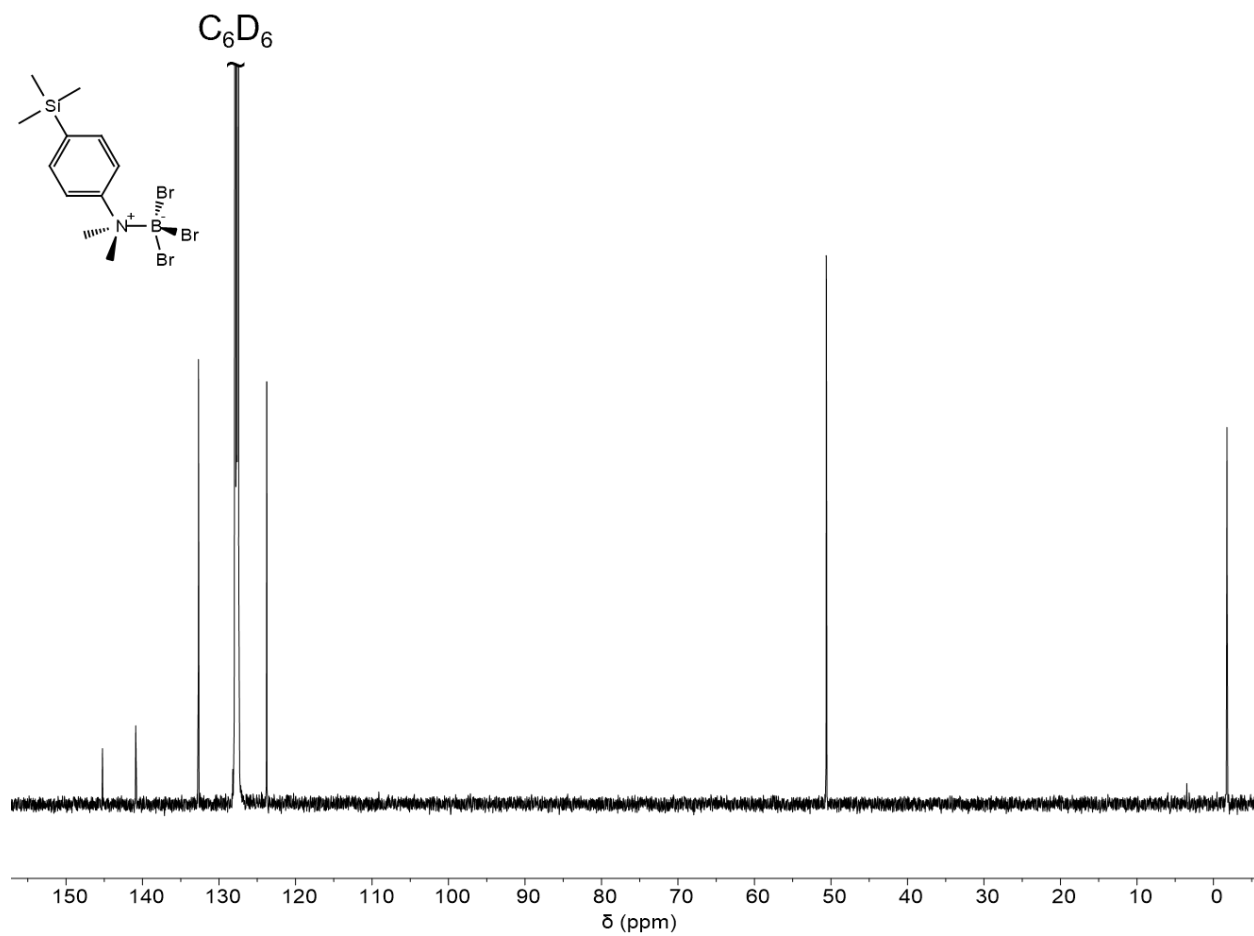

**Figure S77.**  $^{13}\text{C}$  NMR spectrum of  $\text{BBr}_3 \cdot \text{NMe}_2(4\text{-C}_6\text{H}_4\text{SiMe}_3)$ .

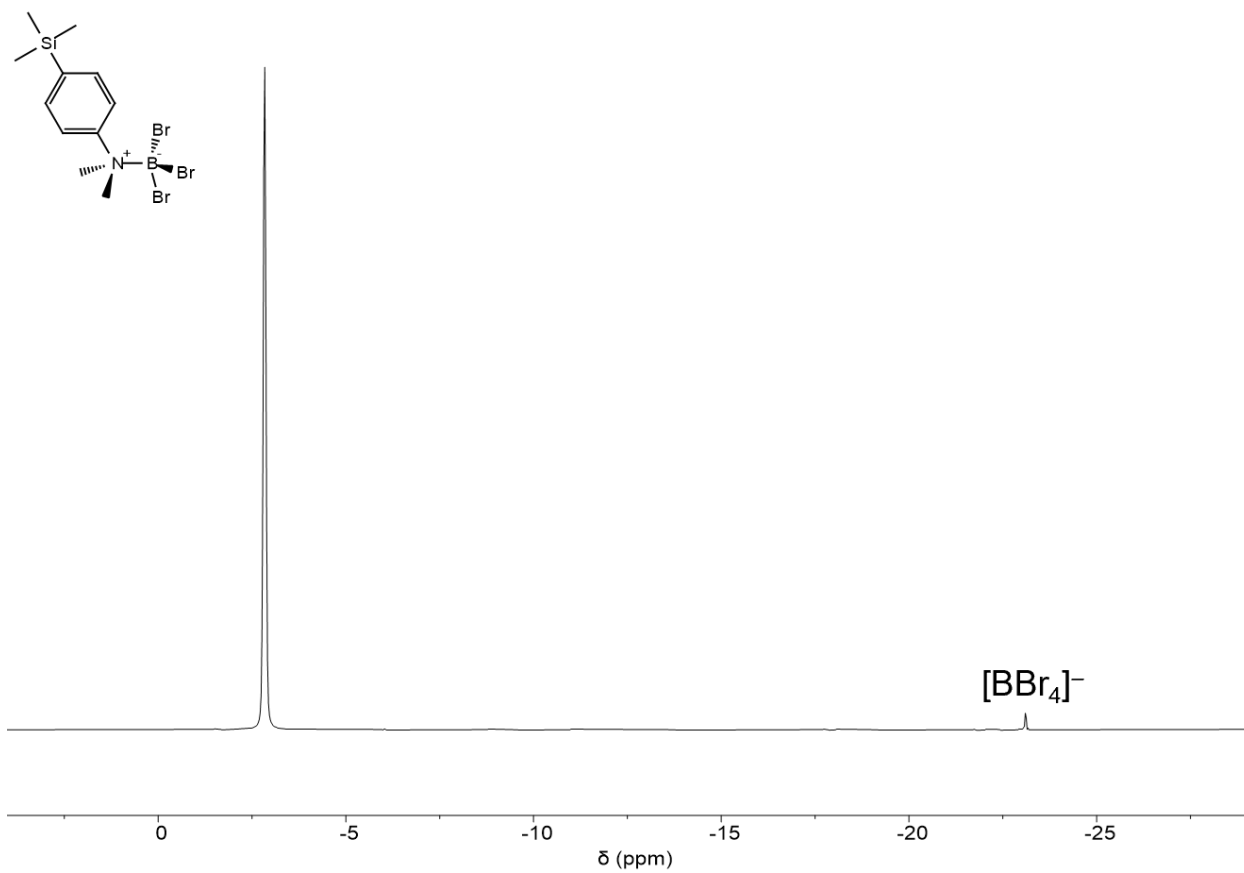

**Figure S78.**  $^{11}\text{B}$  NMR spectrum of  $\text{BBr}_3 \cdot \text{NMe}_2(4\text{-C}_6\text{H}_4\text{SiMe}_3)$ .



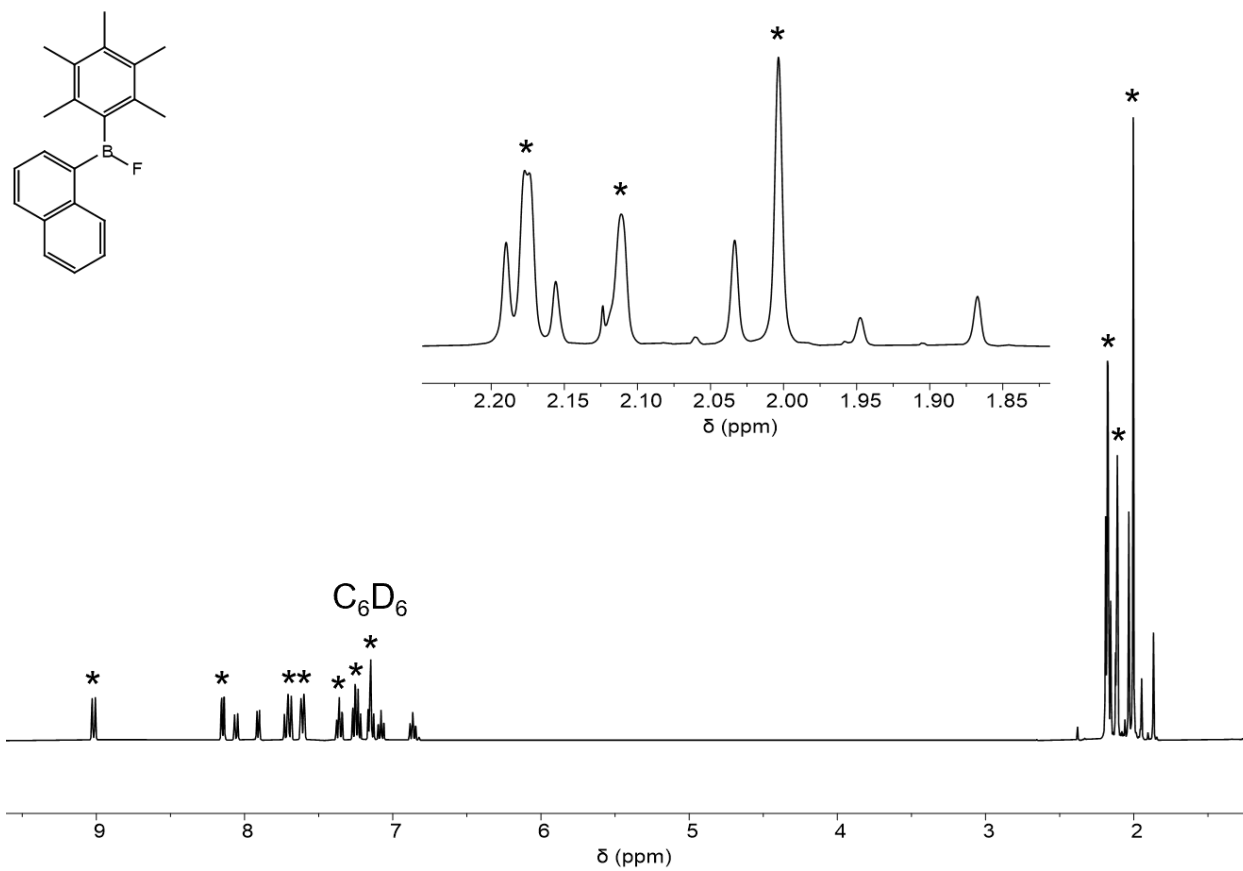

**Figure S79.**  $^1\text{H}$  NMR spectrum of product mixture from reaction of **3b** with NaphLi in pentane at 25°C. Asterisks denote  $\text{Ph}^*\text{B}(\text{Naph})\text{F}$ .

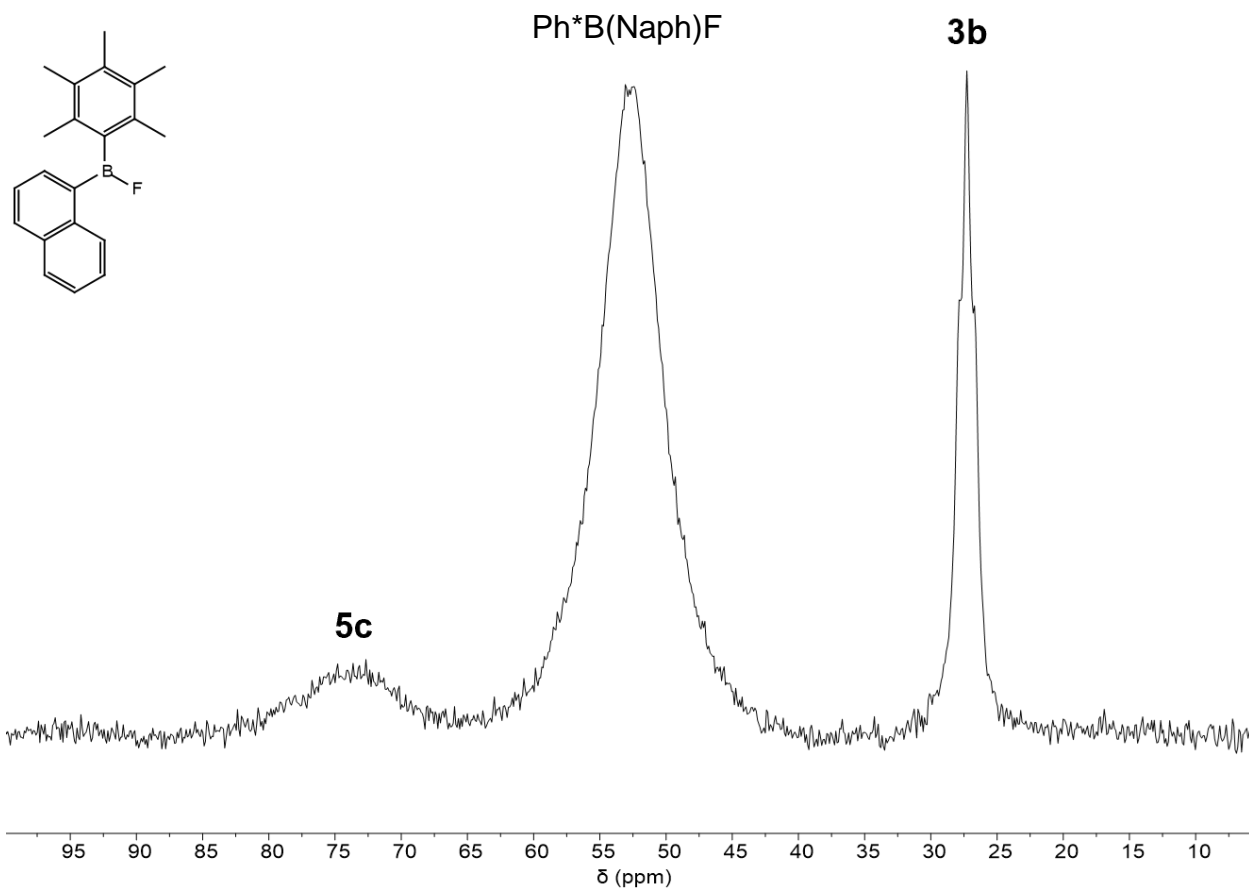

**Figure S80.**  $^{11}\text{B}$  NMR spectrum of product mixture from reaction of **3b** with NaphLi in pentane at 25°C.

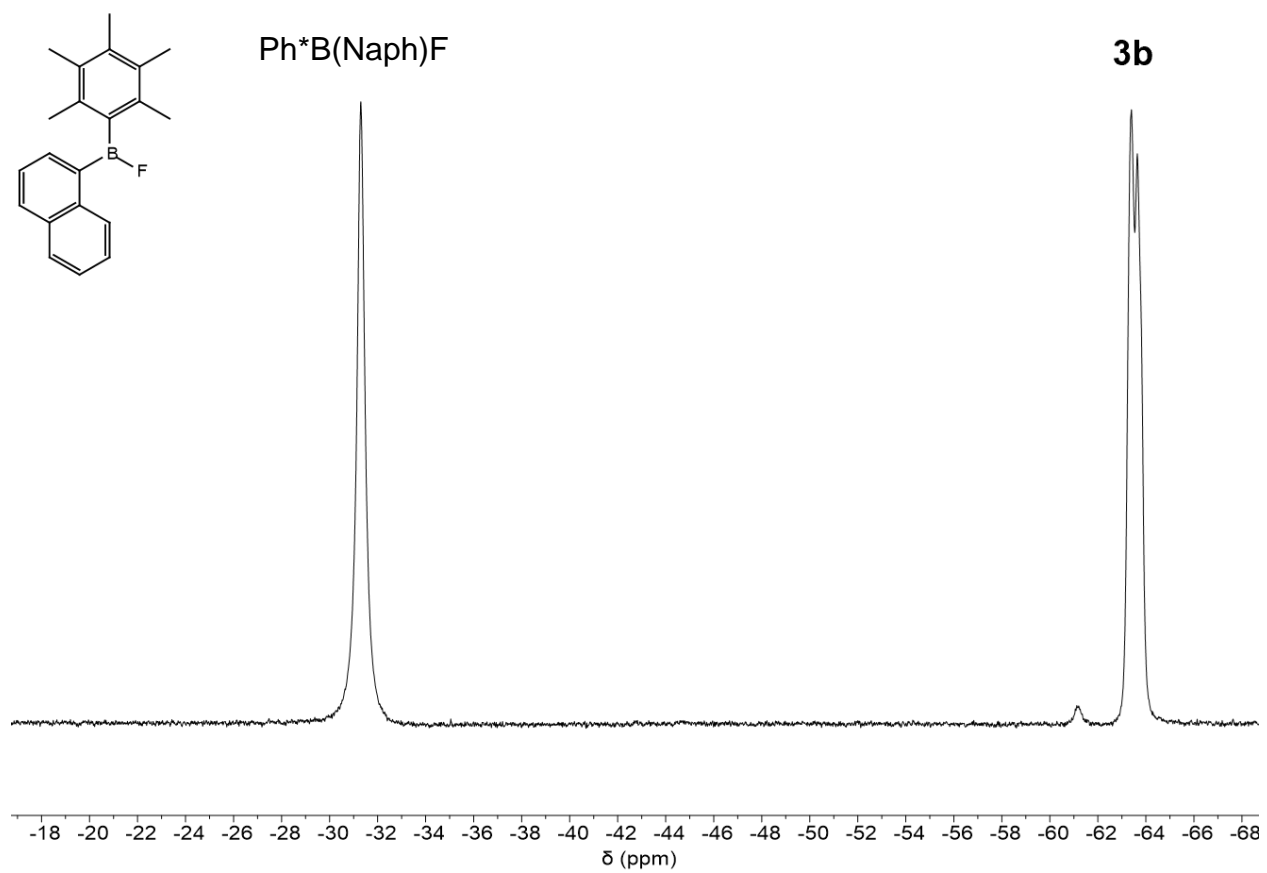

**Figure S81.**  $^{19}\text{F}$  NMR spectrum of product mixture from reaction of **3b** with NaphLi in pentane at 25°C.

## Optimised geometries.

### MesBF2 (3a)

|   |               |               |              |
|---|---------------|---------------|--------------|
| F | 0.9828290000  | -0.9079130000 | 2.9917620000 |
| F | 0.3712930000  | 0.5831780000  | 1.4661710000 |
| C | 0.5834680000  | 3.2832070000  | 1.9442590000 |
| C | 3.2869490000  | 4.6502360000  | 5.8803120000 |
| C | 2.5833180000  | -0.2018350000 | 5.1160420000 |
| C | 2.6759710000  | 3.5610800000  | 5.0601230000 |
| C | 2.8584360000  | 2.2299850000  | 5.4013910000 |
| C | 1.9281550000  | 3.8479060000  | 3.9314250000 |
| C | 2.3210820000  | 1.1999380000  | 4.6502280000 |
| C | 1.3748720000  | 2.8511990000  | 3.1433760000 |
| C | 1.5655560000  | 1.4988940000  | 3.4950380000 |
| B | 0.9624860000  | 0.3719350000  | 2.6368160000 |
| H | 0.5226520000  | 4.3666870000  | 1.9107390000 |
| H | -0.4290030000 | 2.8884650000  | 1.9616920000 |
| H | 1.0389220000  | 2.9426700000  | 1.0176900000 |
| H | 2.8532870000  | 5.6170490000  | 5.6425790000 |
| H | 4.3591250000  | 4.7128740000  | 5.6966780000 |
| H | 3.1542280000  | 4.4648820000  | 6.9436100000 |
| H | 3.2166540000  | -0.1873390000 | 5.9977540000 |
| H | 3.0805590000  | -0.7960830000 | 4.3536600000 |
| H | 1.6626690000  | -0.7210430000 | 5.3699820000 |
| H | 3.4359290000  | 1.9863400000  | 6.2819720000 |
| H | 1.7686140000  | 4.8801750000  | 3.6546250000 |

### Ph\*BF2 (3b)

|   |               |               |               |
|---|---------------|---------------|---------------|
| F | -2.2610400000 | -1.3604960000 | -0.9792760000 |
| F | -3.3399450000 | -0.7347370000 | 0.8672760000  |
| C | 0.4980400000  | 4.6077070000  | -0.0605220000 |
| C | -2.3853130000 | 4.6194940000  | 0.1208430000  |
| C | -3.8450510000 | 2.1270010000  | -0.0397260000 |
| C | 1.9561300000  | 2.1277820000  | 0.0090550000  |
| C | 0.5201210000  | -0.4009130000 | 0.0053500000  |
| C | -2.3431220000 | 2.1109950000  | 0.0066190000  |
| C | -1.6453540000 | 3.3164090000  | 0.0386240000  |
| C | -0.2501470000 | 3.3087520000  | -0.0077000000 |
| C | 0.4555590000  | 2.1037640000  | -0.0063650000 |
| C | -0.2393660000 | 0.8949250000  | -0.0187670000 |
| C | -1.6387740000 | 0.9020360000  | -0.0252340000 |
| B | -2.4270760000 | -0.4301070000 | -0.0470870000 |
| H | -0.0728010000 | 5.3750720000  | -0.5732190000 |
| H | 1.4435490000  | 4.5026300000  | -0.5817730000 |
| H | 0.7207830000  | 4.9843250000  | 0.9393730000  |
| H | -1.8534940000 | 5.3361310000  | 0.7399750000  |
| H | -3.3722910000 | 4.4928350000  | 0.5515290000  |
| H | -2.5157180000 | 5.0770410000  | -0.8612820000 |
| H | -4.2054620000 | 2.8553640000  | -0.7623110000 |
| H | -4.2764460000 | 2.3909060000  | 0.9255900000  |
| H | -4.2616330000 | 1.1665520000  | -0.3253570000 |
| H | 2.3326950000  | 2.8563520000  | 0.7230830000  |
| H | 2.3609640000  | 2.4002220000  | -0.9664750000 |
| H | 2.3775210000  | 1.1658970000  | 0.2737960000  |
| H | 1.1945820000  | -0.4858710000 | -0.8448530000 |
| H | -0.1333240000 | -1.2655660000 | -0.0161910000 |
| H | 1.1284420000  | -0.4815090000 | 0.9048310000  |

## NaphBF2 (3c)

|   |               |               |               |
|---|---------------|---------------|---------------|
| F | -5.9171300000 | 2.4389880000  | 0.0796970000  |
| F | -4.1671590000 | 3.8182210000  | -0.0319700000 |
| C | 0.5459870000  | 1.2344930000  | -0.1069880000 |
| C | -0.1329790000 | 2.4619980000  | -0.1245860000 |
| C | -1.4973600000 | 2.5091920000  | -0.0785360000 |
| C | -0.1633620000 | 0.0725190000  | -0.0429680000 |
| C | -4.3502440000 | 0.1052820000  | 0.1032880000  |
| C | -3.6945980000 | 1.3168820000  | 0.0387850000  |
| C | -2.2664660000 | 1.3277640000  | -0.0117370000 |
| C | -1.5719500000 | 0.0878590000  | 0.0060180000  |
| C | -2.2999610000 | -1.1167750000 | 0.0726380000  |
| C | -3.6623110000 | -1.1132630000 | 0.1206340000  |
| B | -4.5964550000 | 2.5656240000  | 0.0272800000  |
| H | 1.6240420000  | 1.2148300000  | -0.1439920000 |
| H | 0.4300130000  | 3.3812700000  | -0.1749440000 |
| H | -1.9916350000 | 3.4642890000  | -0.0934200000 |
| H | -5.4286780000 | 0.0944970000  | 0.1416470000  |
| H | -1.7522160000 | -2.0478490000 | 0.0850970000  |
| H | -4.2119270000 | -2.0398950000 | 0.1713860000  |
| H | 0.3418280000  | -0.8818610000 | -0.0285670000 |

## AceBF2 (3d)

|   |               |               |               |
|---|---------------|---------------|---------------|
| F | -3.2863330000 | 4.8032240000  | -0.0633220000 |
| F | -1.2020820000 | 5.5924620000  | 0.1190310000  |
| C | 0.3176690000  | -0.8321350000 | 0.0564800000  |
| C | -1.0102240000 | -1.6188600000 | -0.0644900000 |
| C | 0.6479040000  | 1.7647670000  | 0.1519360000  |
| C | -0.0346990000 | 2.9908760000  | 0.1352100000  |
| C | -1.4122270000 | 3.1080320000  | 0.0368330000  |
| C | -0.0859160000 | 0.6142220000  | 0.0662180000  |
| C | -4.1792520000 | 0.5570830000  | -0.2341620000 |
| C | -3.5929810000 | 1.7961420000  | -0.1573640000 |
| C | -2.1907880000 | 1.9130530000  | -0.0524590000 |
| C | -1.4813450000 | 0.7024560000  | -0.0338200000 |
| C | -2.0801160000 | -0.5630860000 | -0.1126740000 |
| C | -3.4395420000 | -0.6411840000 | -0.2138980000 |
| B | -1.9915210000 | 4.5268050000  | 0.0294150000  |
| H | 0.8578590000  | -1.0904980000 | 0.9648240000  |
| H | 0.9881800000  | -1.0429540000 | -0.7739200000 |
| H | -1.1558000000 | -2.2886750000 | 0.7800740000  |
| H | -1.0271950000 | -2.2366620000 | -0.9596480000 |
| H | 1.7241920000  | 1.7501700000  | 0.2308230000  |
| H | 0.5490070000  | 3.8970520000  | 0.2027280000  |
| H | -5.2544860000 | 0.4979480000  | -0.3136540000 |
| H | -4.2126490000 | 2.6763610000  | -0.1775960000 |
| H | -3.9521910000 | -1.5891020000 | -0.2777450000 |

## AnBF2 (3e)

|   |               |               |              |
|---|---------------|---------------|--------------|
| F | -0.2729730000 | 0.4080860000  | 2.2234260000 |
| F | 1.6652720000  | -0.6841090000 | 2.3088760000 |
| C | 5.4875950000  | 2.9942300000  | 2.7787830000 |
| C | -0.6013760000 | 3.2791570000  | 6.7023580000 |
| C | 4.9428390000  | 1.9689520000  | 1.9739220000 |
| C | 4.7530420000  | 3.5139480000  | 3.7923540000 |
| C | 2.6876920000  | 3.5835810000  | 5.0878490000 |
| C | 0.6513750000  | 3.7148690000  | 6.4237340000 |
| C | -1.1686940000 | 2.2406710000  | 5.9307630000 |
| C | 3.6940450000  | 1.4869830000  | 2.2044240000 |
| C | 3.4435220000  | 3.0389360000  | 4.0621800000 |
| C | 1.4017890000  | 3.1464980000  | 5.3620470000 |
| C | -0.4810200000 | 1.6739240000  | 4.9057420000 |
| C | 2.8887390000  | 1.9899680000  | 3.2630220000 |
| C | 0.8310510000  | 2.1039380000  | 4.5654660000 |
| C | 1.5826660000  | 1.5292820000  | 3.5216520000 |
| B | 0.9770400000  | 0.3916960000  | 2.6645610000 |
| H | 6.4819190000  | 3.3610650000  | 2.5780200000 |
| H | -1.1661420000 | 3.7152030000  | 7.5113530000 |
| H | 5.5277290000  | 1.5655810000  | 1.1618280000 |
| H | 5.1465240000  | 4.3047650000  | 4.4134800000 |
| H | 3.1134950000  | 4.3733750000  | 5.6908130000 |
| H | 1.1075210000  | 4.5014970000  | 7.0061970000 |
| H | -2.1630740000 | 1.8915570000  | 6.1623770000 |
| H | 3.3084250000  | 0.7102150000  | 1.5660500000 |
| H | -0.9434340000 | 0.8809760000  | 4.3431030000 |

## 1,4-C6H4(BF2)2 (3f)

|   |               |               |               |
|---|---------------|---------------|---------------|
| F | 1.8133910000  | 4.7360100000  | -0.3144960000 |
| F | -0.0589200000 | 5.8142080000  | 0.3010210000  |
| F | -1.8186770000 | -1.5673590000 | -0.3028490000 |
| F | -3.6909470000 | -0.4891610000 | 0.3127860000  |
| C | -2.2821330000 | 2.1025040000  | 0.3382500000  |
| C | -1.5928420000 | 3.2978790000  | 0.3351410000  |
| C | -0.2406880000 | 3.3340470000  | -0.0040450000 |
| C | 0.4045870000  | 2.1443290000  | -0.3399400000 |
| C | -0.2847040000 | 0.9489510000  | -0.3368280000 |
| C | -1.6368570000 | 0.9127850000  | 0.0023550000  |
| B | 0.5292210000  | 4.6705620000  | -0.0063290000 |
| B | -2.4067630000 | -0.4237330000 | 0.0046630000  |
| H | -3.3285390000 | 2.0848350000  | 0.6020430000  |
| H | -2.1010100000 | 4.2134820000  | 0.5966570000  |
| H | 1.4509900000  | 2.1619970000  | -0.6037460000 |
| H | 0.2234690000  | 0.0333510000  | -0.5983420000 |

p-Xyl- (BF2)2 (3g)

|   |               |               |               |
|---|---------------|---------------|---------------|
| F | 1.8936360000  | 4.5713840000  | -0.2888440000 |
| F | 0.1050220000  | 5.8418010000  | 0.1490830000  |
| F | -1.9863650000 | -1.6023460000 | -0.1515990000 |
| F | -3.7750200000 | -0.3319050000 | 0.2860840000  |
| C | 0.5557570000  | -0.3351250000 | -0.4860500000 |
| C | -2.4369850000 | 4.5745270000  | 0.4841390000  |
| C | -2.2827740000 | 2.1026460000  | 0.2371620000  |
| C | -1.6433130000 | 3.3305800000  | 0.2321790000  |
| C | -0.2625790000 | 3.3420510000  | -0.0132450000 |
| C | 0.4015430000  | 2.1367550000  | -0.2390780000 |
| C | -0.2379170000 | 0.9088210000  | -0.2340930000 |
| C | -1.6186510000 | 0.8973490000  | 0.0113410000  |
| B | 0.5913790000  | 4.6280360000  | -0.0497400000 |
| B | -2.4726000000 | -0.3886410000 | 0.0478900000  |
| H | 1.6008280000  | -0.0893830000 | -0.6479440000 |
| H | 0.1943320000  | -0.8703680000 | -1.3609720000 |
| H | 0.4960310000  | -1.0248900000 | 0.3525550000  |
| H | -3.4820920000 | 4.3288030000  | 0.6458320000  |
| H | -2.3770880000 | 5.2643910000  | -0.3543700000 |
| H | -2.0756930000 | 5.1096500000  | 1.3591910000  |
| H | -3.3463220000 | 2.0777610000  | 0.4250280000  |
| H | 1.4650910000  | 2.1616410000  | -0.4269480000 |

BtpBF2 (3h)

|   |               |               |               |
|---|---------------|---------------|---------------|
| S | -0.3470060000 | -2.9688990000 | -0.0006380000 |
| F | 0.1954610000  | -6.0887800000 | -0.0012130000 |
| F | 2.4417390000  | -5.9321450000 | -0.0008780000 |
| C | 1.1761060000  | -3.7947150000 | -0.0006270000 |
| C | 2.2221350000  | -2.9224480000 | -0.0003790000 |
| C | 2.6169970000  | -0.4054630000 | 0.0000730000  |
| C | 2.0112780000  | 0.8249270000  | 0.0002130000  |
| C | 0.6155860000  | 0.9355560000  | 0.0001010000  |
| C | -0.1874040000 | -0.1799990000 | -0.0001530000 |
| C | 0.4235610000  | -1.4302140000 | -0.0003000000 |
| C | 1.8253260000  | -1.5598770000 | -0.0001880000 |
| B | 1.2701840000  | -5.3170080000 | -0.0009040000 |
| H | 3.2505240000  | -3.2466570000 | -0.0003370000 |
| H | 3.6926070000  | -0.4922500000 | 0.0001580000  |
| H | 2.6123090000  | 1.7205070000  | 0.0004090000  |
| H | 0.1618630000  | 1.9143280000  | 0.0002130000  |
| H | -1.2618490000 | -0.0879300000 | -0.0002400000 |

AceMesBF (4a)

|   |               |              |               |
|---|---------------|--------------|---------------|
| F | 5.8132870000  | 6.6893150000 | 2.2118470000  |
| C | 5.0774430000  | 5.3752760000 | 4.1910400000  |
| C | 5.4225020000  | 4.3149240000 | 5.0154650000  |
| C | 4.8474640000  | 4.0691350000 | 6.2726060000  |
| C | 3.8740550000  | 4.9200160000 | 6.7156490000  |
| C | 3.4928370000  | 5.9975220000 | 5.9031020000  |
| C | 2.4789600000  | 6.7636040000 | 6.4958300000  |
| C | 1.9962840000  | 7.8487820000 | 5.8218170000  |
| C | 2.5394960000  | 8.1463610000 | 4.5575780000  |
| C | 3.5327220000  | 7.3958930000 | 3.9782220000  |
| C | 4.0585970000  | 6.2707080000 | 4.6481050000  |
| C | 2.1273600000  | 6.1688560000 | 7.8316550000  |
| C | 3.0651760000  | 4.9465520000 | 7.9805320000  |
| C | 6.7835450000  | 4.4119060000 | 2.2602970000  |
| C | 6.2663350000  | 3.1789150000 | 1.8517770000  |
| C | 7.1153530000  | 2.2252190000 | 1.3053000000  |
| C | 8.4737360000  | 2.4522190000 | 1.1684730000  |
| C | 8.9779210000  | 3.6781140000 | 1.5820020000  |
| C | 8.1565880000  | 4.6587730000 | 2.1093830000  |
| C | 4.8059820000  | 2.8564330000 | 1.9852480000  |
| C | 9.3787550000  | 1.4140920000 | 0.5835840000  |
| C | 8.7474990000  | 5.9765430000 | 2.5174020000  |
| B | 5.8667530000  | 5.5190440000 | 2.8739240000  |
| H | 6.1900630000  | 3.6376980000 | 4.6690940000  |
| H | 5.1771550000  | 3.2251810000 | 6.8593710000  |
| H | 1.2162710000  | 8.4725920000 | 6.2316660000  |
| H | 2.1574770000  | 9.0017380000 | 4.0205520000  |
| H | 3.9072240000  | 7.6731080000 | 3.0083030000  |
| H | 2.2762440000  | 6.8872400000 | 8.6348460000  |
| H | 1.0806240000  | 5.8744540000 | 7.8671110000  |
| H | 2.5063070000  | 4.0215880000 | 8.1060000000  |
| H | 3.7108750000  | 5.0387720000 | 8.8514880000  |
| H | 6.7024560000  | 1.2811730000 | 0.9767820000  |
| H | 10.0373640000 | 3.8747320000 | 1.4859100000  |
| H | 4.1763090000  | 3.7284150000 | 1.8273440000  |
| H | 4.5124900000  | 2.0971310000 | 1.2650470000  |
| H | 4.5741300000  | 2.4734260000 | 2.9782320000  |
| H | 8.8357210000  | 0.5029990000 | 0.3493050000  |
| H | 9.8447180000  | 1.7718910000 | -0.3332580000 |
| H | 10.1826160000 | 1.1600500000 | 1.2722950000  |
| H | 8.5302840000  | 6.7480620000 | 1.7806150000  |
| H | 8.3464430000  | 6.3230680000 | 3.4685000000  |
| H | 9.8270720000  | 5.9058120000 | 2.6160010000  |



## Ph\*MesBF (4b)

|   |               |               |               |
|---|---------------|---------------|---------------|
| F | 0.0971040000  | 8.3344300000  | 5.1349970000  |
| C | 4.0182360000  | 7.6816890000  | 6.8674380000  |
| C | 2.7556140000  | 8.0768790000  | 6.4621840000  |
| C | 1.0947400000  | 11.5842110000 | 4.3136220000  |
| C | 3.6681160000  | 8.6555750000  | 4.2985330000  |
| C | 0.2152660000  | 10.1442190000 | 2.5760440000  |
| C | 5.1110680000  | 7.7374540000  | 6.0150470000  |
| C | 0.7943530000  | 12.7037880000 | 3.5385460000  |
| C | 0.8088260000  | 10.3050980000 | 3.8313180000  |
| C | 4.9121760000  | 8.2228530000  | 4.7346130000  |
| C | 2.5606780000  | 8.5792630000  | 5.1597720000  |
| C | -0.1074410000 | 11.2628950000 | 1.8093240000  |
| C | 1.6949030000  | 11.7625420000 | 5.6803770000  |
| C | 1.6367000000  | 7.9846250000  | 7.4588320000  |
| C | 6.4595870000  | 7.2800060000  | 6.4710740000  |
| C | 0.1658010000  | 12.5409600000 | 2.3032730000  |
| C | -0.0389070000 | 8.7621370000  | 2.0416440000  |
| C | 3.5614190000  | 9.1742830000  | 2.8944500000  |
| C | 1.1374540000  | 14.0807190000 | 4.0274480000  |
| C | -0.2196220000 | 13.7499710000 | 1.5025000000  |
| C | -0.7464820000 | 11.1141180000 | 0.4592140000  |
| B | 1.1497960000  | 9.0560890000  | 4.7065620000  |
| H | 4.1541770000  | 7.3184320000  | 7.8770900000  |
| H | 5.7503990000  | 8.2711040000  | 4.0535400000  |
| H | 2.7349450000  | 12.0853680000 | 5.6311060000  |
| H | 1.6740420000  | 10.8420760000 | 6.2559250000  |
| H | 1.1528260000  | 12.5107690000 | 6.2549640000  |
| H | 0.9724000000  | 7.1529550000  | 7.2357030000  |
| H | 1.0234660000  | 8.8830050000  | 7.4712690000  |
| H | 2.0343110000  | 7.8356990000  | 8.4586820000  |
| H | 6.4585790000  | 6.2107960000  | 6.6782930000  |
| H | 6.7550170000  | 7.7830410000  | 7.3898490000  |
| H | 7.2188690000  | 7.4741440000  | 5.7191660000  |
| H | 0.3043150000  | 7.9908620000  | 2.7247610000  |
| H | 0.4732600000  | 8.6009830000  | 1.0940040000  |
| H | -1.0986710000 | 8.5836020000  | 1.8657490000  |
| H | 3.3833120000  | 10.2471350000 | 2.8771970000  |
| H | 2.7446100000  | 8.7095490000  | 2.3490370000  |
| H | 4.4809160000  | 8.9779950000  | 2.3502030000  |
| H | 0.2777390000  | 14.5771420000 | 4.4809220000  |
| H | 1.4788880000  | 14.7149390000 | 3.2138850000  |
| H | 1.9257920000  | 14.0576670000 | 4.7715910000  |
| H | -0.4926180000 | 14.5817330000 | 2.1446370000  |
| H | -1.0654580000 | 13.5491720000 | 0.8539770000  |
| H | 0.6001460000  | 14.0902910000 | 0.8671060000  |
| H | -0.7270360000 | 10.0898330000 | 0.1080900000  |
| H | -0.2444530000 | 11.7260160000 | -0.2874300000 |
| H | -1.7904590000 | 11.4289280000 | 0.4764260000  |

AceB(C6F5)F (4c)

|   |               |              |              |
|---|---------------|--------------|--------------|
| F | 5.9123950000  | 6.6819610000 | 2.2872780000 |
| C | 8.1375270000  | 4.6880410000 | 1.9890700000 |
| C | 8.9799470000  | 3.7584500000 | 1.4181320000 |
| C | 8.4976600000  | 2.4943720000 | 1.1434310000 |
| C | 7.1892970000  | 2.1755670000 | 1.4454510000 |
| C | 6.3800820000  | 3.1284770000 | 2.0285450000 |
| C | 6.8227010000  | 4.4067880000 | 2.3193270000 |
| C | 2.9346750000  | 4.9047420000 | 7.9359370000 |
| C | 2.0586680000  | 6.1729160000 | 7.7999280000 |
| C | 4.0779640000  | 6.2754780000 | 4.6724040000 |
| C | 3.6179400000  | 7.4367210000 | 4.0185090000 |
| C | 2.6389370000  | 8.2117490000 | 4.5909420000 |
| C | 2.0490710000  | 7.9053410000 | 5.8310110000 |
| C | 2.4686570000  | 6.7845370000 | 6.4892830000 |
| C | 3.4667760000  | 5.9933750000 | 5.9033150000 |
| C | 3.7800630000  | 4.8804860000 | 6.6963840000 |
| C | 4.7317550000  | 4.0004770000 | 6.2604650000 |
| C | 5.3534730000  | 4.2540490000 | 5.0302350000 |
| C | 5.0746310000  | 5.3488560000 | 4.2230320000 |
| B | 5.8990290000  | 5.5213830000 | 2.9474040000 |
| H | 3.5560330000  | 4.9362000000 | 8.8285740000 |
| H | 2.3312250000  | 4.0025280000 | 8.0106210000 |
| H | 0.9987240000  | 5.9285680000 | 7.8059950000 |
| H | 2.2243110000  | 6.8629060000 | 8.6244330000 |
| H | 4.0279850000  | 7.7250520000 | 3.0663610000 |
| H | 2.3069510000  | 9.0949780000 | 4.0661160000 |
| H | 1.2838490000  | 8.5501790000 | 6.2358110000 |
| H | 5.0087080000  | 3.1292900000 | 6.8338830000 |
| H | 6.1078060000  | 3.5549040000 | 4.7004400000 |
| F | 5.1186430000  | 2.7799740000 | 2.2843990000 |
| F | 6.7251470000  | 0.9637170000 | 1.1682510000 |
| F | 9.2882020000  | 1.5902020000 | 0.5894340000 |
| F | 10.2397900000 | 4.0601660000 | 1.1327790000 |
| F | 8.6408250000  | 5.8941730000 | 2.2491360000 |

MesB(C6F5)F (4d)

|   |               |               |              |
|---|---------------|---------------|--------------|
| F | 0.1840100000  | 8.0860710000  | 4.7659560000 |
| C | 3.7497320000  | 9.2753450000  | 2.9276930000 |
| C | 0.1011130000  | 12.5731110000 | 2.4230150000 |
| C | 6.4556470000  | 7.4252900000  | 6.6627850000 |
| C | 1.5189860000  | 7.7468380000  | 7.2477480000 |
| C | -0.5328130000 | 11.3843170000 | 2.1225050000 |
| C | 2.6045750000  | 8.5264520000  | 5.0802150000 |
| C | 4.9968470000  | 8.3315670000  | 4.8399130000 |
| C | 0.8325970000  | 10.2168530000 | 3.7561890000 |
| C | 1.0951350000  | 12.6011700000 | 3.3803840000 |
| C | 5.1169930000  | 7.8071100000  | 6.1183810000 |
| C | -0.1667930000 | 10.2370560000 | 2.7935210000 |
| C | 3.7723500000  | 8.7047530000  | 4.3161820000 |
| C | 1.4453650000  | 11.4322210000 | 4.0210520000 |
| C | 2.7145710000  | 7.9745900000  | 6.3692320000 |
| C | 3.9643450000  | 7.6428780000  | 6.8675980000 |
| B | 1.2109050000  | 8.9068920000  | 4.5372040000 |
| H | 4.6327120000  | 8.9612740000  | 2.3782040000 |
| H | 2.8788130000  | 8.9626600000  | 2.3594190000 |
| H | 3.7581630000  | 10.3642450000 | 2.9486340000 |
| H | 6.9126090000  | 6.6428630000  | 6.0590740000 |
| H | 7.1373690000  | 8.2738480000  | 6.6552740000 |
| H | 6.3790510000  | 7.0616620000  | 7.6830930000 |
| H | 1.8322690000  | 7.5776090000  | 8.2737280000 |
| H | 0.8354760000  | 8.5923730000  | 7.2424720000 |
| H | 0.9521550000  | 6.8763600000  | 6.9246600000 |
| H | 5.8839650000  | 8.4533980000  | 4.2336590000 |
| H | 4.0388130000  | 7.2402850000  | 7.8679770000 |
| F | 2.4074780000  | 11.5139000000 | 4.9373120000 |
| F | 1.6980910000  | 13.7462920000 | 3.6713720000 |
| F | -0.2433200000 | 13.6832440000 | 1.7949310000 |
| F | -1.4810600000 | 11.3602420000 | 1.1955550000 |
| F | -0.7959480000 | 9.1152150000  | 2.4544730000 |

AceMesBNaph (5a)

|   |              |               |               |
|---|--------------|---------------|---------------|
| C | 4.6743620000 | 6.9781910000  | -2.3001600000 |
| C | 5.2133660000 | 9.2907090000  | 0.5392620000  |
| C | 4.8501860000 | 8.1308620000  | -1.5930340000 |
| C | 4.6801290000 | 5.7430350000  | -1.6338210000 |
| C | 5.3699200000 | 9.2539110000  | 1.8929800000  |
| C | 5.0470080000 | 8.1004800000  | -0.1974380000 |
| C | 4.8700980000 | 5.6843790000  | -0.2828500000 |
| C | 5.3750340000 | 8.0225120000  | 2.5624010000  |
| C | 5.0723930000 | 6.8526790000  | 0.4813670000  |
| C | 5.2608710000 | 6.8202340000  | 1.8966300000  |
| C | 5.0150830000 | 5.4433860000  | 4.2089890000  |
| C | 5.8577260000 | 4.8350660000  | 5.1275500000  |
| C | 5.6126470000 | 4.7736340000  | 6.5109090000  |
| C | 4.4535800000 | 5.3148490000  | 6.9903870000  |
| C | 3.5585660000 | 5.9017300000  | 6.0846600000  |
| C | 2.4010050000 | 6.3703560000  | 6.7228610000  |
| C | 1.4183030000 | 6.9415130000  | 5.9662800000  |
| C | 1.6087350000 | 7.0254460000  | 4.5726480000  |
| C | 2.7441660000 | 6.5695400000  | 3.9515760000  |
| C | 3.7891110000 | 5.9908240000  | 4.7037650000  |
| C | 2.5108000000 | 6.1043060000  | 8.1994820000  |
| C | 3.8803760000 | 5.4034170000  | 8.3763720000  |
| C | 6.3988550000 | 4.3598530000  | 2.1856910000  |
| C | 5.8685470000 | 3.0628060000  | 2.0949070000  |
| C | 6.6445780000 | 2.0288950000  | 1.6004310000  |
| C | 7.9623760000 | 2.2286970000  | 1.2129420000  |
| C | 8.4824060000 | 3.5069350000  | 1.3176350000  |
| C | 7.7217740000 | 4.5729300000  | 1.7802960000  |
| C | 4.4467980000 | 2.7865170000  | 2.4903430000  |
| C | 8.7897860000 | 1.0923870000  | 0.6997380000  |
| C | 8.3478910000 | 5.9350980000  | 1.8422310000  |
| B | 5.5122330000 | 5.5309370000  | 2.7390040000  |
| H | 4.5236510000 | 7.0120890000  | -3.3681080000 |
| H | 5.2036410000 | 10.2324650000 | 0.0100310000  |
| H | 4.8360500000 | 9.0891410000  | -2.0913280000 |
| H | 4.5299880000 | 4.8328940000  | -2.1938730000 |
| H | 5.4875670000 | 10.1683360000 | 2.4538450000  |
| H | 4.8626950000 | 4.7291130000  | 0.2145650000  |
| H | 5.4976330000 | 8.0166760000  | 3.6353740000  |
| H | 6.7700050000 | 4.3899730000  | 4.7569230000  |
| H | 6.3313180000 | 4.2986280000  | 7.1618960000  |
| H | 0.5062310000 | 7.3156830000  | 6.4065900000  |
| H | 0.8270730000 | 7.4628880000  | 3.9696810000  |
| H | 2.8321330000 | 6.6509570000  | 2.8811000000  |
| H | 2.4590090000 | 7.0287080000  | 8.7708250000  |
| H | 1.6936570000 | 5.4765510000  | 8.5484340000  |
| H | 3.7718250000 | 4.4153140000  | 8.8185910000  |
| H | 4.5378620000 | 5.9671760000  | 9.0351420000  |
| H | 6.2111970000 | 1.0411510000  | 1.5148800000  |
| H | 9.5079670000 | 3.6845650000  | 1.0236160000  |
| H | 3.7678390000 | 3.5588590000  | 2.1307000000  |
| H | 4.1099640000 | 1.8345450000  | 2.0886510000  |
| H | 4.3359080000 | 2.7516680000  | 3.5725650000  |
| H | 8.9218610000 | 0.3259700000  | 1.4621750000  |
| H | 8.3151600000 | 0.6138210000  | -0.1551520000 |
| H | 9.7751780000 | 1.4298830000  | 0.3913070000  |
| H | 7.9646890000 | 6.5804360000  | 1.0532950000  |
| H | 8.1432190000 | 6.4347790000  | 2.7867990000  |
| H | 9.4259940000 | 5.8698000000  | 1.7231100000  |

## Ph\*MesBNaph (5b)

|   |               |               |               |
|---|---------------|---------------|---------------|
| C | 3.9647250000  | 2.3281680000  | 4.4177010000  |
| C | 3.5033820000  | 1.0807750000  | 3.9771120000  |
| C | 2.5891140000  | 0.3571430000  | 4.7392740000  |
| C | 2.1104970000  | 0.8905830000  | 5.9373490000  |
| C | 2.6027660000  | 2.1071750000  | 6.4104870000  |
| C | 3.5243340000  | 2.8281600000  | 5.6481070000  |
| C | 3.9375530000  | 0.5369260000  | 2.6437580000  |
| C | 2.1136570000  | -0.9898580000 | 4.2772000000  |
| C | 1.0649000000  | 0.1514730000  | 6.7202530000  |
| C | 2.1324860000  | 2.6268390000  | 7.7384610000  |
| C | 4.0674410000  | 4.1253970000  | 6.1770970000  |
| C | 4.6507590000  | 4.5413290000  | 2.9487340000  |
| C | 3.4180580000  | 4.7950190000  | 2.3199170000  |
| C | 3.1555610000  | 6.0471910000  | 1.7815750000  |
| C | 4.0588210000  | 7.0907170000  | 1.8748170000  |
| C | 5.2571180000  | 6.8488390000  | 2.5279410000  |
| C | 5.5728030000  | 5.6041980000  | 3.0455680000  |
| C | 2.3565390000  | 3.7437750000  | 2.1721000000  |
| C | 3.7587930000  | 8.4354230000  | 1.2932890000  |
| C | 6.9018190000  | 5.4626530000  | 3.7300400000  |
| C | 6.3798310000  | 2.4453230000  | 3.2976910000  |
| C | 6.9255540000  | 1.7801460000  | 4.3741020000  |
| C | 8.2272420000  | 1.2565780000  | 4.3516680000  |
| C | 8.9811470000  | 1.3596360000  | 3.2216780000  |
| C | 8.4608410000  | 1.9765320000  | 2.0646510000  |
| C | 9.2170540000  | 2.0487900000  | 0.8776160000  |
| C | 8.7035240000  | 2.6279710000  | -0.2455940000 |
| C | 7.4018310000  | 3.1510950000  | -0.2272270000 |
| C | 6.6480420000  | 3.0969860000  | 0.9108880000  |
| C | 7.1514280000  | 2.5248680000  | 2.0975790000  |
| B | 4.9878890000  | 3.1221160000  | 3.5273800000  |
| H | 4.4682380000  | 1.2760090000  | 2.0519210000  |
| H | 4.6035700000  | -0.3194180000 | 2.7504070000  |
| H | 3.0829440000  | 0.2082390000  | 2.0548130000  |
| H | 2.8213550000  | -1.4534290000 | 3.5989180000  |
| H | 1.9763060000  | -1.6694540000 | 5.1135750000  |
| H | 1.1576760000  | -0.9272080000 | 3.7540990000  |
| H | 0.4421180000  | 0.8299220000  | 7.2940630000  |
| H | 0.4089100000  | -0.4180220000 | 6.0693450000  |
| H | 1.5087160000  | -0.5531150000 | 7.4262070000  |
| H | 2.7779720000  | 3.4075630000  | 8.1221380000  |
| H | 1.1265380000  | 3.0441180000  | 7.6725310000  |
| H | 2.0988130000  | 1.8361140000  | 8.4843210000  |
| H | 4.7443750000  | 4.5942790000  | 5.4732210000  |
| H | 3.2758190000  | 4.8421200000  | 6.3898410000  |
| H | 4.6195780000  | 3.9748180000  | 7.1045760000  |
| H | 2.2109330000  | 6.2117360000  | 1.2815970000  |
| H | 5.9713700000  | 7.6540960000  | 2.6360800000  |
| H | 2.7502790000  | 2.8140330000  | 1.7707050000  |
| H | 1.8959510000  | 3.5055220000  | 3.1278860000  |
| H | 1.5757700000  | 4.0905820000  | 1.5006510000  |
| H | 3.8856730000  | 9.2225410000  | 2.0341230000  |
| H | 4.4315930000  | 8.6627820000  | 0.4673640000  |
| H | 2.7408380000  | 8.4853570000  | 0.9175450000  |
| H | 6.8537340000  | 4.8328160000  | 4.6135860000  |
| H | 7.6434480000  | 5.0221180000  | 3.0666500000  |
| H | 7.2728330000  | 6.4384000000  | 4.0324800000  |
| H | 6.3396550000  | 1.6787180000  | 5.2757080000  |
| H | 8.6234560000  | 0.7696820000  | 5.2295560000  |
| H | 9.9832510000  | 0.9574830000  | 3.1874560000  |
| H | 10.2123430000 | 1.6288850000  | 0.8734640000  |
| H | 9.2900200000  | 2.6766440000  | -1.1500360000 |
| H | 6.9917480000  | 3.5955670000  | -1.1210330000 |
| H | 5.6468560000  | 3.4944380000  | 0.9053320000  |

## Ph\*BNaph2 (5c)

|   |               |               |               |
|---|---------------|---------------|---------------|
| C | 9.2158500000  | 2.6690780000  | 11.2239190000 |
| C | 9.1063780000  | 1.9887780000  | 10.0107330000 |
| C | 7.8739030000  | 1.9093300000  | 9.3636820000  |
| C | 6.7501560000  | 2.5031130000  | 9.9421490000  |
| C | 6.8632890000  | 3.2158360000  | 11.1374920000 |
| C | 8.0972750000  | 3.2868360000  | 11.7837610000 |
| C | 10.3202360000 | 1.3162620000  | 9.4311690000  |
| C | 7.7454120000  | 1.1920400000  | 8.0516080000  |
| C | 5.4137860000  | 2.3766090000  | 9.2709430000  |
| C | 5.6568600000  | 3.8967730000  | 11.7154150000 |
| C | 8.2455650000  | 4.0459250000  | 13.0729560000 |
| C | 11.6502130000 | 3.7762920000  | 11.4406730000 |
| C | 11.1519750000 | 4.9996240000  | 11.0447460000 |
| C | 11.9861050000 | 6.0771470000  | 10.7122440000 |
| C | 13.3391050000 | 5.9183580000  | 10.7328520000 |
| C | 13.9129480000 | 4.6752990000  | 11.0718640000 |
| C | 15.3104570000 | 4.4932690000  | 11.0552000000 |
| C | 15.8622470000 | 3.2852500000  | 11.3653190000 |
| C | 15.0318540000 | 2.2039580000  | 11.6960590000 |
| C | 13.6745630000 | 2.3538200000  | 11.7228180000 |
| C | 13.0677600000 | 3.5917570000  | 11.4281680000 |
| C | 10.8452890000 | 1.7712680000  | 13.1545820000 |
| C | 10.3629130000 | 0.4882160000  | 13.0076430000 |
| C | 10.6421080000 | -0.5276090000 | 13.9337240000 |
| C | 11.3764590000 | -0.2476570000 | 15.0468200000 |
| C | 11.8499250000 | 1.0591250000  | 15.2865110000 |
| C | 12.5746050000 | 1.3657890000  | 16.4558640000 |
| C | 13.0156580000 | 2.6343340000  | 16.6930710000 |
| C | 12.7386000000 | 3.6534470000  | 15.7693350000 |
| C | 12.0407610000 | 3.3832510000  | 14.6267960000 |
| C | 11.5855360000 | 2.0806390000  | 14.3371610000 |
| B | 10.6024190000 | 2.7416440000  | 11.9562360000 |
| H | 10.6378190000 | 1.7798070000  | 8.4975780000  |
| H | 11.1680770000 | 1.3609910000  | 10.1117950000 |
| H | 10.1374110000 | 0.2634850000  | 9.2213200000  |
| H | 8.7094020000  | 1.0319610000  | 7.5825390000  |
| H | 7.2750070000  | 0.2145280000  | 8.1696270000  |
| H | 7.1328290000  | 1.7551980000  | 7.3514570000  |
| H | 4.6000630000  | 2.4143630000  | 9.9878550000  |
| H | 5.2454710000  | 3.1791750000  | 8.5502020000  |
| H | 5.3264940000  | 1.4392170000  | 8.7302750000  |
| H | 4.9690320000  | 3.1806710000  | 12.1673130000 |
| H | 5.9249090000  | 4.6129070000  | 12.4834030000 |
| H | 5.0986450000  | 4.4321340000  | 10.9505660000 |
| H | 7.5600650000  | 3.6881450000  | 13.8393850000 |
| H | 9.2514480000  | 3.9553880000  | 13.4775950000 |
| H | 8.0519070000  | 5.1103840000  | 12.9410910000 |
| H | 10.0817570000 | 5.1414740000  | 11.0126080000 |
| H | 11.5513800000 | 7.0256370000  | 10.4367410000 |
| H | 13.9948160000 | 6.7375250000  | 10.4756710000 |
| H | 15.9367970000 | 5.3307820000  | 10.7847490000 |
| H | 16.9332680000 | 3.1551980000  | 11.3492340000 |
| H | 15.4696730000 | 1.2453740000  | 11.9282290000 |
| H | 13.0520480000 | 1.5091010000  | 11.9670170000 |
| H | 9.7693990000  | 0.2498030000  | 12.1371730000 |
| H | 10.2685200000 | -1.5254700000 | 13.7627110000 |
| H | 11.5955870000 | -1.0182010000 | 15.7715770000 |
| H | 12.7683790000 | 0.5743550000  | 17.1650320000 |
| H | 13.5691790000 | 2.8595050000  | 17.5915400000 |
| H | 13.0774050000 | 4.6590840000  | 15.9652330000 |
| H | 11.8257540000 | 4.1798250000  | 13.9334470000 |

## Fc\_BAceMes\_2

|    |               |               |               |
|----|---------------|---------------|---------------|
| Fe | 6.6105170000  | 4.6797190000  | 7.5104910000  |
| C  | 6.6072750000  | 4.9007130000  | 9.5424390000  |
| C  | 5.5342070000  | 5.6257540000  | 8.9899180000  |
| C  | 6.0762850000  | 6.5871750000  | 8.0989380000  |
| C  | 7.4776920000  | 6.4453560000  | 8.1007340000  |
| C  | 7.8407290000  | 5.3897970000  | 9.0007920000  |
| C  | 8.7414420000  | 5.8427630000  | 12.0437400000 |
| C  | 9.3506430000  | 1.3254230000  | 14.0856220000 |
| C  | 9.8645670000  | 1.8579900000  | 9.1483790000  |
| C  | 9.0187990000  | 4.3781360000  | 11.8631810000 |
| C  | 9.0540650000  | 3.5561030000  | 12.9754740000 |
| C  | 9.3326740000  | 2.1994900000  | 12.8709970000 |
| C  | 9.5966080000  | 1.6896630000  | 11.6132560000 |
| C  | 9.5869330000  | 2.4922850000  | 10.4780130000 |
| C  | 9.2896920000  | 3.8531530000  | 10.5877950000 |
| C  | 15.0422490000 | 5.9141220000  | 7.2888030000  |
| C  | 14.0257510000 | 5.9352640000  | 6.1214690000  |
| C  | 11.8211640000 | 5.2586070000  | 9.0451000000  |
| C  | 12.2085410000 | 5.1362170000  | 10.3973670000 |
| C  | 13.5264760000 | 5.2528640000  | 10.7611380000 |
| C  | 14.5537180000 | 5.5020760000  | 9.8306810000  |
| C  | 14.2159390000 | 5.6379280000  | 8.5150260000  |
| C  | 12.8678990000 | 5.5187800000  | 8.1456090000  |
| C  | 12.6909780000 | 5.6923580000  | 6.7661520000  |
| C  | 11.4261010000 | 5.6228830000  | 6.2565310000  |
| C  | 10.3598080000 | 5.3806600000  | 7.1402160000  |
| C  | 10.4950880000 | 5.1800070000  | 8.5066720000  |
| C  | 5.3513190000  | 3.3026900000  | 6.6752660000  |
| C  | 6.5070340000  | 2.6546640000  | 7.1517250000  |
| C  | 7.6228240000  | 3.2077930000  | 6.4727050000  |
| C  | 7.1512610000  | 4.1978060000  | 5.5886630000  |
| C  | 5.7238940000  | 4.2797410000  | 5.6952070000  |
| C  | 3.6975280000  | 2.7848150000  | 3.7063310000  |
| C  | -0.9215190000 | 3.6192280000  | 5.4183730000  |
| C  | 2.7080820000  | 6.8803030000  | 6.4856600000  |
| C  | 2.7576130000  | 3.6385040000  | 4.5074310000  |
| C  | 1.4279640000  | 3.2705590000  | 4.6092900000  |
| C  | 0.5106380000  | 4.0405580000  | 5.3128480000  |
| C  | 0.9628880000  | 5.2070730000  | 5.9014450000  |
| C  | 2.2888450000  | 5.6135230000  | 5.8027160000  |
| C  | 3.2090240000  | 4.8275900000  | 5.1049970000  |
| C  | 5.3335310000  | 9.9498530000  | 0.9244580000  |
| C  | 6.4264600000  | 10.0109560000 | 2.0191450000  |
| C  | 4.5396140000  | 6.9511220000  | 2.9897670000  |
| C  | 3.4198040000  | 6.3940210000  | 2.3349700000  |
| C  | 2.8948170000  | 6.9901100000  | 1.2160770000  |
| C  | 3.4308360000  | 8.1666200000  | 0.6581190000  |
| C  | 4.5213290000  | 8.7284250000  | 1.2573580000  |
| C  | 5.0562000000  | 8.1168890000  | 2.4010310000  |
| C  | 6.1729120000  | 8.8108430000  | 2.8865710000  |
| C  | 6.8150520000  | 8.3245700000  | 3.9889130000  |
| C  | 6.3271350000  | 7.1483430000  | 4.5849590000  |
| C  | 5.2129920000  | 6.4447690000  | 4.1496770000  |
| B  | 9.2310450000  | 4.8092780000  | 9.3392570000  |
| B  | 4.7284380000  | 5.2158680000  | 4.9767200000  |
| H  | 6.5272270000  | 4.0824250000  | 10.2353710000 |

|   |               |               |               |
|---|---------------|---------------|---------------|
| H | 4.4893310000  | 5.4584750000  | 9.1779100000  |
| H | 5.5140700000  | 7.2767030000  | 7.4962240000  |
| H | 8.1651280000  | 7.0371800000  | 7.5245500000  |
| H | 8.9154670000  | 6.1467530000  | 13.0726120000 |
| H | 7.7104240000  | 6.0881450000  | 11.7947840000 |
| H | 9.3744970000  | 6.4557270000  | 11.4031590000 |
| H | 10.0036150000 | 1.7315540000  | 14.8559010000 |
| H | 9.6958930000  | 0.3238120000  | 13.8452400000 |
| H | 8.3563810000  | 1.2390980000  | 14.5221970000 |
| H | 10.4816240000 | 0.9702930000  | 9.2609770000  |
| H | 10.3735750000 | 2.5411200000  | 8.4742060000  |
| H | 8.9390420000  | 1.5485950000  | 8.6634820000  |
| H | 8.8703770000  | 3.9854680000  | 13.9516320000 |
| H | 9.8297110000  | 0.6385010000  | 11.5082970000 |
| H | 15.8016180000 | 5.1486660000  | 7.1442320000  |
| H | 15.5686140000 | 6.8624100000  | 7.3754180000  |
| H | 14.0391360000 | 6.8858210000  | 5.5923980000  |
| H | 14.2468820000 | 5.1667440000  | 5.3834490000  |
| H | 11.4696280000 | 4.9466510000  | 11.1559470000 |
| H | 13.7864120000 | 5.1505940000  | 11.8042010000 |
| H | 15.5761840000 | 5.5848480000  | 10.1675860000 |
| H | 11.2287150000 | 5.7468910000  | 5.2019330000  |
| H | 9.3705320000  | 5.3124010000  | 6.7177640000  |
| H | 4.3447750000  | 3.1280120000  | 7.0106200000  |
| H | 6.5445530000  | 1.9033150000  | 7.9193220000  |
| H | 8.6527920000  | 2.9467740000  | 6.6331720000  |
| H | 7.7625580000  | 4.7918300000  | 4.9341900000  |
| H | 3.1503320000  | 2.1208430000  | 3.0423260000  |
| H | 4.3253370000  | 2.1702000000  | 4.3491690000  |
| H | 4.3681520000  | 3.3893230000  | 3.0961600000  |
| H | -1.0166520000 | 2.6812320000  | 5.9637230000  |
| H | -1.3609600000 | 3.4627450000  | 4.4347910000  |
| H | -1.5150180000 | 4.3673810000  | 5.9362650000  |
| H | 1.8652670000  | 7.5552680000  | 6.6097650000  |
| H | 3.4807690000  | 7.4015290000  | 5.9269120000  |
| H | 3.1065480000  | 6.6733460000  | 7.4784820000  |
| H | 1.0942460000  | 2.3657970000  | 4.1183510000  |
| H | 0.2642020000  | 5.8293520000  | 6.4444390000  |
| H | 5.7695280000  | 9.8727590000  | -0.0694090000 |
| H | 4.7166230000  | 10.8459160000 | 0.9249960000  |
| H | 6.3636550000  | 10.9303260000 | 2.5979160000  |
| H | 7.4266330000  | 9.9816470000  | 1.5919130000  |
| H | 2.9650070000  | 5.4950560000  | 2.7117840000  |
| H | 2.0360610000  | 6.5374820000  | 0.7431450000  |
| H | 2.9809050000  | 8.5973310000  | -0.2238530000 |
| H | 7.6791510000  | 8.8178050000  | 4.4091240000  |
| H | 6.8381480000  | 6.7879540000  | 5.4631190000  |



## BF3·OEt2

|   |               |               |               |
|---|---------------|---------------|---------------|
| F | -2.7073090000 | -0.5619520000 | -0.3745790000 |
| F | -1.6388410000 | 0.4063620000  | 1.3883600000  |
| F | -0.7188390000 | -1.4243240000 | 0.3553020000  |
| O | -0.6908610000 | 0.6515120000  | -0.7403990000 |
| C | -0.6778920000 | -0.7122550000 | -2.7857100000 |
| C | -0.3910920000 | 3.0587080000  | -0.7742000000 |
| C | 0.1297310000  | 0.0759710000  | -1.7938950000 |
| C | -1.3230650000 | 1.9195250000  | -1.0666310000 |
| B | -1.5069470000 | -0.3172760000 | 0.2388630000  |
| H | -1.4479260000 | -0.1049020000 | -3.2540500000 |
| H | -1.1473350000 | -1.5698180000 | -2.3150280000 |
| H | -0.0110790000 | -1.0708720000 | -3.5667070000 |
| H | 0.5195370000  | 2.9989010000  | -1.3647790000 |
| H | -0.1266000000 | 3.0762340000  | 0.2787700000  |
| H | -0.8874740000 | 3.9945100000  | -1.0204770000 |
| H | 0.6446760000  | 0.9128310000  | -2.2552160000 |
| H | 0.8579290000  | -0.5406260000 | -1.2822240000 |
| H | -2.2167050000 | 1.9647090000  | -0.4562920000 |
| H | -1.6217050000 | 1.8789020000  | -2.1106700000 |

## C6F6

|   |               |               |               |
|---|---------------|---------------|---------------|
| F | 1.7433720000  | 3.9825030000  | -0.0015390000 |
| F | 3.0960650000  | 1.6404330000  | 0.0004220000  |
| F | 1.7429790000  | -0.7017640000 | 0.0014910000  |
| F | -0.9598250000 | -0.7016170000 | 0.0005960000  |
| F | -2.3126680000 | 1.6407160000  | -0.0013860000 |
| F | -0.9597230000 | 3.9826540000  | -0.0024250000 |
| C | -0.9888030000 | 1.6405280000  | -0.0009450000 |
| C | -0.2983190000 | 2.8358630000  | -0.0014780000 |
| C | 1.0818470000  | 2.8357960000  | -0.0010070000 |
| C | 1.7722040000  | 1.6403840000  | -0.0000070000 |
| C | 1.0817740000  | 0.4451440000  | 0.0005670000  |
| C | -0.2985020000 | 0.4452090000  | 0.0000750000  |

## MesBC12

|    |               |               |              |
|----|---------------|---------------|--------------|
| Cl | -0.2509850000 | -0.7086360000 | 3.2924240000 |
| Cl | 1.4503390000  | 0.1206610000  | 0.9865590000 |
| C  | 0.4685850000  | 3.2270040000  | 2.0109930000 |
| C  | 3.2796960000  | 4.6552210000  | 5.8890680000 |
| C  | 2.6685110000  | -0.2174000000 | 4.9885970000 |
| C  | 2.6861000000  | 3.5649140000  | 5.0549810000 |
| C  | 2.9351090000  | 2.2323030000  | 5.3524340000 |
| C  | 1.8726120000  | 3.8529250000  | 3.9721640000 |
| C  | 2.3835600000  | 1.2048120000  | 4.6082390000 |
| C  | 1.3225790000  | 2.8524010000  | 3.1852420000 |
| C  | 1.5727180000  | 1.5136560000  | 3.5063580000 |
| B  | 0.9630430000  | 0.3821950000  | 2.6505880000 |
| H  | 0.1161240000  | 4.2503840000  | 2.1012860000 |
| H  | -0.4040700000 | 2.5831720000  | 1.9173500000 |
| H  | 1.0268070000  | 3.1510180000  | 1.0791030000 |
| H  | 3.0370210000  | 5.6352840000  | 5.4891060000 |
| H  | 4.3635520000  | 4.5677210000  | 5.9353870000 |
| H  | 2.9107820000  | 4.6092420000  | 6.9125160000 |
| H  | 3.5370020000  | -0.2767100000 | 5.6380810000 |
| H  | 2.8614050000  | -0.8426360000 | 4.1185190000 |
| H  | 1.8268430000  | -0.6578000000 | 5.5208550000 |
| H  | 3.5746920000  | 1.9869010000  | 6.1892590000 |
| H  | 1.6614850000  | 4.8849360000  | 3.7289250000 |

## MesBBr2

|    |               |               |              |
|----|---------------|---------------|--------------|
| Br | -0.5133900000 | -0.6539700000 | 3.3099220000 |
| Br | 1.6246190000  | -0.0209930000 | 0.9244370000 |
| C  | 0.4277030000  | 3.2232090000  | 2.0480130000 |
| C  | 3.3014840000  | 4.6626560000  | 5.8814990000 |
| C  | 2.6989140000  | -0.2124950000 | 4.9626280000 |
| C  | 2.6998840000  | 3.5720260000  | 5.0533370000 |
| C  | 2.9639630000  | 2.2396310000  | 5.3394880000 |
| C  | 1.8631320000  | 3.8598480000  | 3.9881580000 |
| C  | 2.4072250000  | 1.2120770000  | 4.5994750000 |
| C  | 1.3022880000  | 2.8591750000  | 3.2093980000 |
| C  | 1.5710070000  | 1.5220890000  | 3.5181590000 |
| B  | 0.9541920000  | 0.3934870000  | 2.6686130000 |
| H  | 0.0719790000  | 4.2457710000  | 2.1339190000 |
| H  | -0.4443560000 | 2.5751340000  | 1.9739260000 |
| H  | 0.9708920000  | 3.1406820000  | 1.1074610000 |
| H  | 3.0558930000  | 5.6424500000  | 5.4825910000 |
| H  | 4.3855840000  | 4.5747310000  | 5.9190470000 |
| H  | 2.9406820000  | 4.6183560000  | 6.9079560000 |
| H  | 3.5658090000  | -0.2788390000 | 5.6134390000 |
| H  | 2.8968060000  | -0.8253980000 | 4.0842240000 |
| H  | 1.8573200000  | -0.6639890000 | 5.4863400000 |
| H  | 3.6197750000  | 1.9943920000  | 6.1637220000 |
| H  | 1.6421050000  | 4.8915380000  | 3.7522810000 |

MesBF2 dimer

|   |               |               |               |
|---|---------------|---------------|---------------|
| F | 6.1662700000  | 2.8505440000  | 4.5196230000  |
| F | 5.2806030000  | 4.3828290000  | 3.1829490000  |
| F | 1.2818020000  | -1.1556440000 | 3.1612360000  |
| F | 0.4713430000  | 0.3134740000  | 1.7107680000  |
| C | 3.9618120000  | 3.6942200000  | 0.8714080000  |
| C | 3.1514860000  | -1.1440260000 | 0.1083760000  |
| C | 5.8944480000  | 0.1681900000  | 4.0325900000  |
| C | 3.7834680000  | -0.0639210000 | 0.9242500000  |
| C | 4.5308840000  | -0.3686780000 | 2.0518490000  |
| C | 3.6390100000  | 1.2691840000  | 0.5802750000  |
| C | 5.1123680000  | 0.6146260000  | 2.8338950000  |
| C | 4.1987980000  | 2.2883280000  | 1.3344450000  |
| C | 4.9377190000  | 1.9731190000  | 2.4924010000  |
| C | 0.6739510000  | 3.0243270000  | 2.1311170000  |
| C | 3.3507950000  | 4.4933040000  | 6.0463030000  |
| C | 2.6381460000  | -0.3769400000 | 5.4102500000  |
| C | 2.7436970000  | 3.3824960000  | 5.2530850000  |
| C | 2.9185150000  | 2.0601420000  | 5.6331430000  |
| C | 1.9971590000  | 3.6389920000  | 4.1161470000  |
| C | 2.3800570000  | 1.0117810000  | 4.9075530000  |
| C | 1.4429050000  | 2.6222250000  | 3.3540020000  |
| C | 1.6377100000  | 1.2799950000  | 3.7369410000  |
| B | 5.4712190000  | 3.0867490000  | 3.4107780000  |
| B | 1.1214100000  | 0.1287040000  | 2.8558820000  |
| H | 3.4083630000  | 3.6901820000  | -0.0627920000 |
| H | 4.8935500000  | 4.2299120000  | 0.7097420000  |
| H | 3.3922760000  | 4.2636820000  | 1.6012030000  |
| H | 2.3972760000  | -0.7422640000 | -0.5616600000 |
| H | 2.6823060000  | -1.8912590000 | 0.7438840000  |
| H | 3.8982390000  | -1.6573170000 | -0.4967460000 |
| H | 5.9155370000  | -0.9163770000 | 4.0803910000  |
| H | 5.4603720000  | 0.5405890000  | 4.9569760000  |
| H | 6.9204580000  | 0.5255160000  | 3.9999780000  |
| H | 4.6575010000  | -1.4041680000 | 2.3351690000  |
| H | 3.0619110000  | 1.5251720000  | -0.2968980000 |
| H | 0.6110170000  | 4.1067750000  | 2.0712580000  |
| H | -0.3373000000 | 2.6266060000  | 2.1379150000  |
| H | 1.1505880000  | 2.6628160000  | 1.2227370000  |
| H | 3.2605810000  | 5.4436690000  | 5.5292030000  |
| H | 4.4053480000  | 4.3069680000  | 6.2374690000  |
| H | 2.8612730000  | 4.5888680000  | 7.0147730000  |
| H | 3.2161220000  | -0.3388200000 | 6.3286700000  |
| H | 3.1898860000  | -0.9697120000 | 4.6852890000  |
| H | 1.7132190000  | -0.9099610000 | 5.6150570000  |
| H | 3.4981560000  | 1.8387620000  | 6.5183810000  |
| H | 1.8506040000  | 4.6636090000  | 3.8055720000  |

MesBC12 dimer

|    |               |               |               |
|----|---------------|---------------|---------------|
| C1 | -0.7215000000 | -0.8040930000 | 3.5604130000  |
| C1 | 0.2291780000  | 0.3583160000  | 1.0124730000  |
| C1 | 7.5754200000  | 3.5439810000  | 3.1920680000  |
| C1 | 5.0716040000  | 5.1167710000  | 3.1520570000  |
| C  | 3.9961110000  | 3.6335660000  | 0.5149480000  |
| C  | 3.4186360000  | -1.3058150000 | 0.7434500000  |
| C  | 6.0869510000  | 0.9161530000  | 4.2898860000  |
| C  | 3.9900140000  | -0.0490140000 | 1.3153690000  |
| C  | 4.7419830000  | -0.0819890000 | 2.4782800000  |
| C  | 3.7764040000  | 1.1800350000  | 0.7153770000  |
| C  | 5.3082030000  | 1.0587540000  | 3.0158290000  |
| C  | 4.3033110000  | 2.3530240000  | 1.2318010000  |
| C  | 5.1085800000  | 2.3013220000  | 2.3847620000  |
| C  | 0.5334690000  | 3.2934150000  | 2.2832640000  |
| C  | 3.5742020000  | 3.8066160000  | 6.1904030000  |
| C  | 2.2295630000  | -0.7770400000 | 4.8408540000  |
| C  | 2.7953350000  | 2.9199170000  | 5.2737630000  |
| C  | 2.8296810000  | 1.5433560000  | 5.4255100000  |
| C  | 2.0340980000  | 3.4399670000  | 4.2413730000  |
| C  | 2.0981560000  | 0.6994490000  | 4.6110450000  |
| C  | 1.3043240000  | 2.6311350000  | 3.3851100000  |
| C  | 1.3031520000  | 1.2377180000  | 3.5818090000  |
| B  | 5.8408340000  | 3.5607740000  | 2.8883520000  |
| B  | 0.3650170000  | 0.3294910000  | 2.7624820000  |
| H  | 3.5270690000  | 3.4250530000  | -0.4421040000 |
| H  | 4.8864630000  | 4.2292680000  | 0.3275320000  |
| H  | 3.3138530000  | 4.2521130000  | 1.0943620000  |
| H  | 2.8914750000  | -1.1161530000 | -0.1862720000 |
| H  | 2.7171730000  | -1.7701500000 | 1.4353590000  |
| H  | 4.2029690000  | -2.0350900000 | 0.5486140000  |
| H  | 5.7440910000  | 0.0430040000  | 4.8391260000  |
| H  | 5.9809560000  | 1.7807130000  | 4.9390950000  |
| H  | 7.1495620000  | 0.7842660000  | 4.0951120000  |
| H  | 4.8894860000  | -1.0254300000 | 2.9860510000  |
| H  | 3.1823880000  | 1.2296340000  | -0.1855600000 |
| H  | 0.5227120000  | 4.3697570000  | 2.4267680000  |
| H  | -0.4979510000 | 2.9525110000  | 2.2329170000  |
| H  | 0.9864650000  | 3.0881740000  | 1.3154230000  |
| H  | 3.3956890000  | 4.8555440000  | 5.9758450000  |
| H  | 4.6444280000  | 3.6253580000  | 6.0999660000  |
| H  | 3.3080330000  | 3.6207100000  | 7.2294030000  |
| H  | 3.1979910000  | -0.9987430000 | 5.2823120000  |
| H  | 2.1450950000  | -1.3480900000 | 3.9207390000  |
| H  | 1.4665390000  | -1.1449970000 | 5.5241740000  |
| H  | 3.4475270000  | 1.1116170000  | 6.2010450000  |
| H  | 2.0060720000  | 4.5099130000  | 4.0951990000  |

MesBBr2 dimer

|    |               |               |               |
|----|---------------|---------------|---------------|
| Br | -1.2424740000 | -0.5754530000 | 3.5264410000  |
| Br | 0.2701810000  | 0.5099520000  | 0.8663640000  |
| Br | 7.9249550000  | 3.7263980000  | 2.6074940000  |
| Br | 5.0524100000  | 5.1596580000  | 3.1191260000  |
| C  | 4.3723500000  | 3.4519260000  | 0.1386010000  |
| C  | 3.5980370000  | -1.4290410000 | 0.8442990000  |
| C  | 6.2315630000  | 1.1152230000  | 4.2290990000  |
| C  | 4.1895750000  | -0.1360630000 | 1.3066110000  |
| C  | 4.8975430000  | -0.0675700000 | 2.4972220000  |
| C  | 4.0454210000  | 1.0243790000  | 0.5658240000  |
| C  | 5.4699020000  | 1.1112830000  | 2.9380560000  |
| C  | 4.5818130000  | 2.2315430000  | 0.9834140000  |
| C  | 5.3178800000  | 2.2790480000  | 2.1750090000  |
| C  | 0.1822080000  | 3.4754180000  | 2.6604890000  |
| C  | 3.4551470000  | 3.6571670000  | 6.4204300000  |
| C  | 2.0129840000  | -0.7921730000 | 4.7042210000  |
| C  | 2.6423680000  | 2.8537480000  | 5.4566160000  |
| C  | 2.6939500000  | 1.4680400000  | 5.4694950000  |
| C  | 1.8136000000  | 3.4661620000  | 4.5326230000  |
| C  | 1.9218110000  | 0.7015920000  | 4.6162490000  |
| C  | 1.0480900000  | 2.7371280000  | 3.6367880000  |
| C  | 1.0841880000  | 1.3356250000  | 3.6841920000  |
| B  | 6.0114780000  | 3.5864210000  | 2.6023060000  |
| B  | 0.1543290000  | 0.5074450000  | 2.7775230000  |
| H  | 4.0434430000  | 3.1759480000  | -0.8589140000 |
| H  | 5.2799740000  | 4.0442040000  | 0.0365060000  |
| H  | 3.6124680000  | 4.1012430000  | 0.5702450000  |
| H  | 3.1330140000  | -1.3250740000 | -0.1314040000 |
| H  | 2.8372520000  | -1.7841800000 | 1.5377800000  |
| H  | 4.3578840000  | -2.2055670000 | 0.7776780000  |
| H  | 5.9466630000  | 0.2671060000  | 4.8454400000  |
| H  | 6.0529260000  | 2.0208710000  | 4.8058320000  |
| H  | 7.3045610000  | 1.0490630000  | 4.0563150000  |
| H  | 5.0086570000  | -0.9593950000 | 3.0989510000  |
| H  | 3.4941200000  | 0.9927560000  | -0.3629720000 |
| H  | 0.0671990000  | 4.5126340000  | 2.9611020000  |
| H  | -0.8129500000 | 3.0422360000  | 2.5803700000  |
| H  | 0.6176650000  | 3.4660840000  | 1.6629480000  |
| H  | 3.3292750000  | 4.7225830000  | 6.2531590000  |
| H  | 4.5151980000  | 3.4257610000  | 6.3343770000  |
| H  | 3.1649070000  | 3.4413310000  | 7.4475890000  |
| H  | 2.9415160000  | -1.0905240000 | 5.1829860000  |
| H  | 1.9764800000  | -1.2640640000 | 3.7246930000  |
| H  | 1.1941820000  | -1.2040970000 | 5.2916720000  |
| H  | 3.3484240000  | 0.9691210000  | 6.1712210000  |
| H  | 1.7609770000  | 4.5451750000  | 4.5049680000  |

## BF3

|   |               |               |              |
|---|---------------|---------------|--------------|
| F | 0.8459750000  | 0.8122360000  | 0.0000000000 |
| F | -1.1191770000 | -0.3224500000 | 0.0000000000 |
| F | -1.1191770000 | 1.9469220000  | 0.0000000000 |
| B | -0.4641600000 | 0.8122360000  | 0.0000000000 |

## [BF4]-

|   |               |               |               |
|---|---------------|---------------|---------------|
| F | -0.4636570000 | 0.8122360000  | 1.4015390000  |
| F | 0.8574290000  | 0.8122360000  | -0.4666860000 |
| F | -1.1252190000 | -0.3317830000 | -0.4674060000 |
| F | -1.1252190000 | 1.9562560000  | -0.4674060000 |
| B | -0.4640090000 | 0.8122360000  | -0.0000400000 |

## [MesBF3]-

|   |               |               |              |
|---|---------------|---------------|--------------|
| F | -0.1114311848 | -0.3425714570 | 3.3441708862 |
| F | 1.9388791763  | -0.7059983646 | 2.3821128148 |
| F | 0.4310307967  | 0.6514187309  | 1.3635274518 |
| C | 0.5927897751  | 3.3241938751  | 1.9587310847 |
| C | 3.3334130575  | 4.6725692901  | 5.8843589028 |
| C | 2.5252760727  | -0.1776418593 | 5.1070325518 |
| C | 2.7134239549  | 3.5859460788  | 5.0597484674 |
| C | 2.8607657707  | 2.2522492300  | 5.4033202572 |
| C | 1.9702404508  | 3.8712363123  | 3.9304141519 |
| C | 2.3051694274  | 1.2349164401  | 4.6401211068 |
| C | 1.3981189034  | 2.8717650789  | 3.1461362910 |
| C | 1.5669065093  | 1.5201990375  | 3.4771150338 |
| B | 0.9455400113  | 0.2779514828  | 2.6224043585 |
| H | 0.5194021395  | 4.4091811509  | 1.9475523855 |
| H | -0.4116041251 | 2.9122675721  | 1.9755679318 |
| H | 1.0382745334  | 3.0021234390  | 1.0222609326 |
| H | 3.0166553331  | 5.6542897451  | 5.5431134766 |
| H | 4.4209067230  | 4.6404234469  | 5.8316822222 |
| H | 3.0627530869  | 4.5805311704  | 6.9344962028 |
| H | 2.8215630161  | -0.1897429927 | 6.1535074270 |
| H | 3.3074607996  | -0.6652435755 | 4.5303304253 |
| H | 1.6315196021  | -0.7810827048 | 4.9913242457 |
| H | 3.4187662509  | 1.9940041588  | 6.2940348797 |
| H | 1.8205956875  | 4.9049506030  | 3.6484433994 |

## [Ph\*BF3]-

|   |               |               |              |
|---|---------------|---------------|--------------|
| F | -0.0838060000 | -0.3410710000 | 3.0651620000 |
| F | 2.0968330000  | -0.6841250000 | 2.4393750000 |
| F | 0.7842750000  | 0.6876950000  | 1.2166980000 |
| C | 3.7143050000  | 1.8945530000  | 6.6264150000 |
| C | 1.8630930000  | 5.3279490000  | 3.4701260000 |
| C | 0.4605090000  | 3.2832770000  | 2.0435670000 |
| C | 3.3001020000  | 4.6786430000  | 5.9078430000 |
| C | 2.3782220000  | -0.1805640000 | 5.1681440000 |
| C | 2.7190250000  | 3.5826620000  | 5.0568540000 |
| C | 2.8780820000  | 2.2472910000  | 5.4266060000 |
| C | 1.9826000000  | 3.8955590000  | 3.9157460000 |
| C | 2.2813210000  | 1.2371100000  | 4.6678470000 |
| C | 1.3759130000  | 2.8785770000  | 3.1697350000 |
| C | 1.5675240000  | 1.5295330000  | 3.4959330000 |
| B | 1.0734800000  | 0.2945500000  | 2.5423560000 |
| H | 4.5254040000  | 2.6030730000  | 6.7693640000 |
| H | 4.1656160000  | 0.9135940000  | 6.5171390000 |
| H | 3.1328280000  | 1.8783660000  | 7.5512990000 |
| H | 2.7355140000  | 5.9076340000  | 3.7571440000 |
| H | 0.9884480000  | 5.8286400000  | 3.8921960000 |
| H | 1.7789460000  | 5.3971930000  | 2.3899480000 |
| H | -0.0560000000 | 4.2102930000  | 2.2832250000 |
| H | -0.2862100000 | 2.5229310000  | 1.8598030000 |
| H | 0.9934570000  | 3.4384860000  | 1.1045260000 |
| H | 2.6927980000  | 5.5779400000  | 5.8665640000 |
| H | 4.3097790000  | 4.9574080000  | 5.5975580000 |
| H | 3.3553500000  | 4.3843290000  | 6.9514660000 |
| H | 2.2813830000  | -0.2132360000 | 6.2521380000 |
| H | 3.3308220000  | -0.6455590000 | 4.9118860000 |
| H | 1.5954490000  | -0.7969890000 | 4.7462530000 |

## [NaphBF3]-

|   |               |               |               |
|---|---------------|---------------|---------------|
| F | -4.2773720000 | 3.4556470000  | 1.1335840000  |
| F | -5.9594210000 | 2.3587670000  | 0.0389580000  |
| F | -4.3213380000 | 3.4175450000  | -1.1533540000 |
| C | 0.5323100000  | 1.2483780000  | -0.0300000000 |
| C | -0.1710190000 | 2.4646100000  | -0.0365220000 |
| C | -1.5364180000 | 2.4742880000  | -0.0220310000 |
| C | -0.1521610000 | 0.0684780000  | -0.0120150000 |
| C | -4.3415320000 | 0.0612980000  | 0.0336870000  |
| C | -3.7078000000 | 1.2786330000  | 0.0146290000  |
| C | -2.2824930000 | 1.2736520000  | -0.0023980000 |
| C | -1.5629320000 | 0.0470630000  | 0.0021670000  |
| C | -2.2773090000 | -1.1680160000 | 0.0207470000  |
| C | -3.6402310000 | -1.1573730000 | 0.0376260000  |
| B | -4.5794730000 | 2.6509560000  | 0.0085790000  |
| H | 1.6123430000  | 1.2510220000  | -0.0389450000 |
| H | 0.3733540000  | 3.3971060000  | -0.0507880000 |
| H | -2.0718570000 | 3.4092070000  | -0.0263030000 |
| H | -5.4218320000 | 0.0431780000  | 0.0453620000  |
| H | -1.7267940000 | -2.0984210000 | 0.0236540000  |
| H | -4.1876350000 | -2.0892600000 | 0.0521910000  |
| H | 0.3784550000  | -0.8736290000 | -0.0065920000 |

[AceBF3]-

|   |               |               |               |
|---|---------------|---------------|---------------|
| F | -2.9345360000 | 4.7142250000  | 1.1298710000  |
| F | -2.8603530000 | 4.7482960000  | -1.1561070000 |
| F | -1.1165690000 | 5.6024060000  | 0.0566330000  |
| C | 0.3307210000  | -0.8760430000 | 0.0341900000  |
| C | -1.0174810000 | -1.6405150000 | -0.0461030000 |
| C | 0.6794860000  | 1.7330280000  | 0.0741480000  |
| C | 0.0009800000  | 2.9741970000  | 0.0619370000  |
| C | -1.3688340000 | 3.1114370000  | 0.0114700000  |
| C | -0.0506440000 | 0.5815920000  | 0.0308800000  |
| C | -4.1586170000 | 0.5951130000  | -0.1555130000 |
| C | -3.5426700000 | 1.8190470000  | -0.1069970000 |
| C | -2.1322810000 | 1.9109420000  | -0.0403910000 |
| C | -1.4465430000 | 0.6873390000  | -0.0288360000 |
| C | -2.0734700000 | -0.5659030000 | -0.0768990000 |
| C | -3.4362080000 | -0.6190310000 | -0.1413520000 |
| B | -2.0766360000 | 4.5687950000  | 0.0107580000  |
| H | 0.8807870000  | -1.1401620000 | 0.9359550000  |
| H | 0.9767840000  | -1.1223320000 | -0.8067410000 |
| H | -1.1507730000 | -2.3026070000 | 0.8077800000  |
| H | -1.0657420000 | -2.2669210000 | -0.9353460000 |
| H | 1.7600510000  | 1.7164190000  | 0.1181570000  |
| H | 0.5957560000  | 3.8765340000  | 0.0953090000  |
| H | -5.2370700000 | 0.5536700000  | -0.2074540000 |
| H | -4.1281510000 | 2.7245420000  | -0.1213750000 |
| H | -3.9673890000 | -1.5593890000 | -0.1812930000 |

[AnBF3]-

|   |               |               |              |
|---|---------------|---------------|--------------|
| F | 0.9814090000  | 0.7600980000  | 1.2111510000 |
| F | -0.2902460000 | -0.1629700000 | 2.8471960000 |
| F | 1.8769160000  | -0.7914240000 | 2.6478950000 |
| C | 5.4751800000  | 2.9749500000  | 2.7967950000 |
| C | -0.5928860000 | 3.3272480000  | 6.7379840000 |
| C | 4.9245660000  | 1.9405930000  | 2.0070620000 |
| C | 4.7414330000  | 3.5130780000  | 3.8018300000 |
| C | 2.6860660000  | 3.6099750000  | 5.1069570000 |
| C | 0.6627330000  | 3.7457280000  | 6.4475130000 |
| C | -1.1785010000 | 2.2982040000  | 5.9666180000 |
| C | 3.6680170000  | 1.4791450000  | 2.2410790000 |
| C | 3.4250790000  | 3.0553790000  | 4.0756170000 |
| C | 1.4041560000  | 3.1683110000  | 5.3814870000 |
| C | -0.5004540000 | 1.7228120000  | 4.9392890000 |
| C | 2.8513210000  | 2.0074820000  | 3.2840210000 |
| C | 0.8249860000  | 2.1188680000  | 4.5872820000 |
| C | 1.5453050000  | 1.5274810000  | 3.5295440000 |
| B | 1.0008660000  | 0.3171050000  | 2.5558220000 |
| H | 6.4751870000  | 3.3306190000  | 2.5972050000 |
| H | -1.1451980000 | 3.7732630000  | 7.5518300000 |
| H | 5.5100530000  | 1.5132640000  | 1.2067270000 |
| H | 5.1437420000  | 4.3048880000  | 4.4181250000 |
| H | 3.1175780000  | 4.3993470000  | 5.7078050000 |
| H | 1.1314940000  | 4.5312240000  | 7.0236880000 |
| H | -2.1794540000 | 1.9650220000  | 6.1974750000 |
| H | 3.2721420000  | 0.6913130000  | 1.6270800000 |
| H | -0.9657390000 | 0.9438400000  | 4.3668030000 |



[F2B-C6H4-BF3]-

|   |               |               |               |
|---|---------------|---------------|---------------|
| F | -0.2542670000 | 5.8168790000  | 0.3579610000  |
| F | 1.0999920000  | 4.9866490000  | -1.2930470000 |
| F | 1.6526000000  | 4.6632420000  | 0.9021900000  |
| F | -1.8005800000 | -1.6179250000 | -0.1306630000 |
| F | -3.7342190000 | -0.5191360000 | 0.1369800000  |
| C | -2.3328140000 | 2.0975530000  | 0.1426890000  |
| C | -1.6423170000 | 3.2940060000  | 0.1441110000  |
| C | -0.2566900000 | 3.3393630000  | 0.0015280000  |
| C | 0.4095640000  | 2.1210710000  | -0.1428380000 |
| C | -0.2673310000 | 0.9198120000  | -0.1456190000 |
| C | -1.6581040000 | 0.8832710000  | -0.0025650000 |
| B | 0.5723240000  | 4.7342900000  | -0.0062810000 |
| B | -2.4114460000 | -0.4414370000 | 0.0012740000  |
| H | -3.4079890000 | 2.0954960000  | 0.2566090000  |
| H | -2.1818510000 | 4.2221770000  | 0.2648030000  |
| H | 1.4854720000  | 2.1239970000  | -0.2473760000 |
| H | 0.2772000000  | -0.0074350000 | -0.2574150000 |

[F2B-Xyl-BF3]-

|   |               |               |               |
|---|---------------|---------------|---------------|
| F | 0.1612710000  | 5.5375200000  | -1.1238900000 |
| F | 1.9677290000  | 4.4599410000  | -0.2280790000 |
| F | 0.4238680000  | 5.4381490000  | 1.1494480000  |
| F | -2.0046920000 | -1.6370640000 | -0.1311780000 |
| F | -3.8012060000 | -0.3643140000 | 0.2379110000  |
| C | 0.5527640000  | -0.3670500000 | -0.4107660000 |
| C | -2.4138270000 | 4.5644890000  | 0.4248990000  |
| C | -2.2957010000 | 2.0847010000  | 0.1979100000  |
| C | -1.6404440000 | 3.3009920000  | 0.1930780000  |
| C | -0.2533950000 | 3.3274080000  | -0.0182700000 |
| C | 0.3952470000  | 2.1113380000  | -0.2049250000 |
| C | -0.2480390000 | 0.8827370000  | -0.1976810000 |
| C | -1.6364580000 | 0.8641320000  | 0.0077970000  |
| B | 0.5922730000  | 4.7162210000  | -0.0546010000 |
| B | -2.4824210000 | -0.4044390000 | 0.0364670000  |
| H | 1.6052890000  | -0.1226390000 | -0.5232460000 |
| H | 0.2354550000  | -0.9032560000 | -1.3033590000 |
| H | 0.4536940000  | -1.0591890000 | 0.4230830000  |
| H | -3.4851020000 | 4.3800960000  | 0.3839740000  |
| H | -2.1583050000 | 5.3200170000  | -0.3130780000 |
| H | -2.1772370000 | 4.9902470000  | 1.3982140000  |
| H | -3.3662680000 | 2.0703720000  | 0.3549500000  |
| H | 1.4646350000  | 2.1299720000  | -0.3650210000 |

[BtpBF3]-

|   |               |               |               |
|---|---------------|---------------|---------------|
| S | -0.3100430000 | -2.9617620000 | 0.0055790000  |
| F | 1.2025630000  | -5.8771760000 | -1.3380690000 |
| F | 0.1632600000  | -5.9460510000 | 0.6959800000  |
| F | 2.4562380000  | -5.8707590000 | 0.5724100000  |
| C | 1.2122910000  | -3.7905120000 | 0.0223840000  |
| C | 2.2356970000  | -2.9018180000 | 0.0302070000  |
| C | 2.6123390000  | -0.3701600000 | 0.0144290000  |
| C | 2.0021990000  | 0.8637960000  | -0.0012310000 |
| C | 0.6096200000  | 0.9716120000  | -0.0150420000 |
| C | -0.1812720000 | -0.1578200000 | -0.0150830000 |
| C | 0.4324410000  | -1.4041420000 | -0.0021150000 |
| C | 1.8351890000  | -1.5317010000 | 0.0144830000  |
| B | 1.2600490000  | -5.4118250000 | -0.0090430000 |
| H | 3.2679590000  | -3.2155670000 | 0.0488340000  |
| H | 3.6897830000  | -0.4469430000 | 0.0253190000  |
| H | 2.6043970000  | 1.7598820000  | -0.0027840000 |
| H | 0.1477430000  | 1.9472590000  | -0.0261610000 |
| H | -1.2576270000 | -0.0746990000 | -0.0256730000 |

## References.

- 1 K. Shoyama, D. Schmidt, M. Mahl and F. Würthner, *Org. Lett.*, 2017, **19**, 5328–5331.
- 2 X. Yang, D. Liu and Q. Miao, *Angew. Chem. Int. Ed.*, 2014, **53**, 6786–6790.
- 3 L. T. Ball, G. C. Lloyd-Jones and C. A. Russell, *Chem. Eur. J.*, 2012, **18**, 2931–2937.
- 4 W. Kaim, H. Tesmann and H. Bock, *Chem. Ber.*, 1980, **113**, 3221–3234.
- 5 L. Elmir, G. Bentabed-Ababsa, W. Erb, T. Roisnel and F. Mongin, *Eur. J. Org. Chem.*, 2023, **26**, e202300024.
- 6 M. C. Haberecht, J. B. Heilmann, A. Haghiri, M. Bolte, J. W. Bats, H.-W. Lerner, M. C. Holthausen and M. Wagner, *Z. Anorg. Allg. Chem.*, 2004, **630**, 904–913.
- 7 J. E. Borger, M. S. Bakker, A. W. Ehlers, M. Lutz, J. C. Slootweg and K. Lammertsma, *Chem. Commun.*, 2016, **52**, 3284–3287.
- 8 T. Pullmann, B. Engendahl, Z. Zhang, M. Hölscher, A. Zanotti-Gerosa, A. Dyke, G. Franciò and W. Leitner, *Chem. Eur. J.*, 2010, **16**, 7517–7526.
- 9 M. D. Rausch and D. J. Ciappenelli, *J. Organomet. Chem.*, 1967, **10**, 127–136.
- 10 M. R. Willcott, *J. Am. Chem. Soc.*, 2009, **131**, 13180–13180.
- 11 O. V. Dolomanov, L. J. Bourhis, R. J. Gildea, J. a. K. Howard and H. Puschmann, *J. Appl. Crystallogr.*, 2009, **42**, 339–341.
- 12 G. M. Sheldrick, *Acta Crystallogr. A*, 2015, **71**, 3–8.
- 13 F. Kleemiss, O. V. Dolomanov, M. Bodensteiner, N. Peyerimhoff, L. Midgley, L. J. Bourhis, A. Genoni, L. A. Malaspina, D. Jayatilaka, J. L. Spencer, F. White, B. Grundkötter-Stock, S. Steinhauer, D. Lentz, H. Puschmann and S. Grabowsky, *Chem. Sci.*, 2021, **12**, 1675–1692.
- 14 F. Neese, *WIREs Comput. Mol. Sci.*, 2012, **2**, 73–78.
- 15 C. F. Macrae, I. Sovago, S. J. Cottrell, P. T. A. Galek, P. McCabe, E. Pidcock, M. Platings, G. P. Shields, J. S. Stevens, M. Towler and P. A. Wood, *J. Appl. Crystallogr.*, 2020, **53**, 226–235.
- 16 L. J. Farrugia, *J. Appl. Crystallogr.*, 1997, **30**, 565–565.
- 17 Gaussian 16, revision C.01. M. J. Frisch, G. W. Trucks, H. B. Schlegel, G. E. Scuseria, M. A. Robb, J. R. Cheeseman, G. Scalmani, V. Barone, G. A. Petersson, H. Nakatsuji, X. Li, M. Caricato, A. V. Marenich, J. Bloino, B. G. Janesko, R. Gomperts, B. Mennucci, H. P. Hratchian, J. V. Ortiz, A. F. Izmaylov, J. L. Sonnenberg, D. Williams-Young, F. Ding, F. Lipparini, F. Egidi, J. Goings, B.

Peng, A. Petrone, T. Henderson, D. Ranasinghe, V. G. Zakrzewski, J. Gao, N. Rega, G. Zheng, W. Liang, M. Hada, M. Ehara, K. Toyota, R. Fukuda, J. Hasegawa, M. Ishida, T. Nakajima, Y. Honda, O. Kitao, H. Nakai, T. Vreven, K. Throssell, J. A. Montgomery, Jr., J. E. Peralta, F. Ogliaro, M. J. Bearpark, J. J. Heyd, E. N. Brothers, K. N. Kudin, V. N. Staroverov, T. A. Keith, R. Kobayashi, J. Normand, K. Raghavachari, A. P. Rendell, J. C. Burant, S. S. Iyengar, J. Tomasi, M. Cossi, J. M. Millam, M. Klene, C. Adamo, R. Cammi, J. W. Ochterski, R. L. Martin, K. Morokuma, O. Farkas, J. B. Foresman, and D. J. Fox, Gaussian, Inc., Wallingford CT, **2016**.

- 18 B. N. Barbu, T. M. Kosak, A. J. Prins, J. G. Gillmore and A. L. Korich, *Tetrahedron Lett.*, 2016, **57**, 3746–3748.
